# Supplementary material for: Whole-Genome and Epigenomic Landscapes of Etiologically Distinct Subtypes of Cholangiocarcinoma
Source: Oxford University Press journal article supplement (doi:10.1158/2159-8290.cd-17-0368), 2017-06-30
Supplement: 21598290cd170368-sup-181437_2_supp_4118309_grylgl.xlsx [file 21598290cd170368-sup-181437_2_supp_4118309_grylgl.xlsx]

## Sheet: TableS5A
Supplementary Table 5A. Number of Somatic Nonsilent Mutations Per Tumor in 71 WGS
Tumor	sSNVs	Indels	Total
CCA_CH_1	226	22	248
CCA_CH_2	19	9	28
CCA_CH_3	68	8	76
CCA_CH_4	50	6	56
CCA_CH_5	44	8	52
CCA_CH_6	2	3	5
CCA_CH_7	37	4	41
CCA_CH_8	20	4	24
CCA_IT_1	163	103	266
CCA_IT_2	70	13	83
CCA_IT_3	22	2	24
CCA_IT_4	48	3	51
CCA_JP_1	29	6	35
CCA_JP_2	30	4	34
CCA_JP_3	33	5	38
CCA_JP_4	21	5	26
CCA_JP_5	32	7	39
CCA_JP_6	24	4	28
CCA_JP_7	62	8	70
CCA_JP_8	52	11	63
CCA_JP_9	84	5	89
CCA_JP_10	42	3	45
CCA_RO_1	20	0	20
CCA_RO_2	57	8	65
CCA_RO_3	247	93	340
CCA_RO_4	40	8	48
CCA_RO_5	29	3	32
CCA_RO_6	15	8	23
CCA_RO_7	31	3	34
CCA_SG_1	99	12	111
CCA_SG_2	13	2	15
CCA_SG_3	16	4	20
CCA_SG_4	21	5	26
CCA_SG_5	31	2	33
CCA_SG_6	18	7	25
CCA_SG_7	816	400	1216
CCA_SG_8	16	2	18
CCA_SG_9	67	7	74
CCA_SG_10	62	1	63
CCA_SG_11	33	8	41
CCA_SG_12	25	7	32
CCA_SG_13	69	8	77
CCA_SG_14	35	5	40
CCA_SG_15	19	2	21
CCA_SG_16	27	4	31
CCA_SG_17	78	6	84
CCA_SG_18	40	7	47
CCA_SG_19	54	3	57
CCA_SG_20	18	1	19
CCA_TH_1	41	3	44
CCA_TH_2	30	3	33
CCA_TH_3	82	8	90
CCA_TH_4	35	3	38
CCA_TH_5	67	10	77
CCA_TH_6	17	2	19
CCA_TH_7	96	10	106
CCA_TH_8	46	2	48
CCA_TH_9	62	11	73
CCA_TH_10	90	10	100
CCA_TH_11	34	10	44
CCA_TH_12	27	0	27
CCA_TH_13	95	9	104
CCA_TH_14	68	12	80
CCA_TH_15	84	5	89
CCA_TH_16	65	11	76
CCA_TH_17	55	6	61
CCA_TH_18	131	16	147
CCA_TH_19	66	238	304
CCA_TH_20	66	9	75
CCA_TH_21	33	6	39
CCA_TH_22	77	8	85
Average	63.9577	17.6197	81.5775
Median	41	6	47

## Sheet: TableS5B
Supplementary Table 5B. Coverage Statistics for 388 Tumor-Normal Pairs CCAs
Sample ID	Tumor average coverage	Matched normal average coverage
CCA_BR_1	562.21	690.135
CCA_BR_2	645.104	598.542
CCA_BR_3	553.798	532.306
CCA_FR_1	359.916	346.49
CCA_FR_2	503.228	385.123
CCA_FR_3	380.109	387.418
CCA_FR_4	545.469	407.962
CCA_FR_5	505.352	529.756
CCA_FR_6	432.585	379.442
CCA_FR_7	405.764	423.552
CCA_FR_8	493.684	378.008
CCA_FR_9	385.77	390.3
CCA_FR_10	564.108	514.467
CCA_FR_11	405.433	441.074
CCA_FR_12	715.576	632.494
CCA_FR_13	469.191	356.783
CCA_FR_14	425.044	472.716
CCA_FR_15	345.495	391.568
CCA_FR_16	336.229	370.232
CCA_JP_11	152.978	158.583
CCA_JP_12	163.799	153.43
CCA_JP_13	170.13	151.435
CCA_JP_14	160.323	145.152
CCA_JP_15	416.062	451.018
CCA_JP_16	186.172	172.486
CCA_JP_17	145.061	145.609
CCA_JP_18	155.796	127.294
CCA_JP_19	155.235	160.588
CCA_JP_20	168.741	153.836
CCA_JP_21	167.548	168.057
CCA_JP_22	176.7	146.712
CCA_JP_23	169.061	163.611
CCA_JP_24	193.67	161.097
CCA_JP_25	164.505	160.809
CCA_JP_26	99.7006	98.4052
CCA_JP_27	93.5216	102.276
CCA_JP_28	113.035	97.0936
CCA_JP_29	107.415	102.407
CCA_JP_30	103.55	105.227
CCA_JP_31	117.626	78.3193
CCA_JP_32	86.0494	90.0848
CCA_JP_33	89.4726	77.1347
CCA_JP_34	91.3	89.5318
CCA_JP_35	82.2865	84.4925
CCA_JP_36	116.764	110.076
CCA_JP_37	107.705	106.233
CCA_JP_38	115.253	105.961
CCA_JP_39	90.2196	111.605
CCA_JP_40	106.161	105.627
CCA_JP_41	111.61	107.767
CCA_JP_42	112.929	110.601
CCA_JP_43	113.328	111.161
CCA_JP_44	110.713	99.3092
CCA_JP_45	107.946	105.137
CCA_JP_46	112.983	105.727
CCA_JP_47	110.25	112.53
CCA_JP_48	137.962	122.276
CCA_JP_49	124.577	122.52
CCA_JP_50	128.511	121.886
CCA_JP_51	129.91	130.705
CCA_JP_52	124.243	122.627
CCA_JP_53	129.759	121.953
CCA_JP_54	140.855	130.29
CCA_JP_55	103.381	92.2053
CCA_JP_56	103.48	100.002
CCA_JP_57	111.151	96.9376
CCA_JP_58	108.998	105.725
CCA_JP_59	102.67	99.4206
CCA_JP_60	99.2958	100.37
CCA_JP_61	100.165	103.141
CCA_JP_62	108.281	100.886
CCA_JP_63	101.75	96.9853
CCA_JP_64	95.0462	90.4225
CCA_JP_65	94.8183	102.114
CCA_JP_66	90.7946	87.9896
CCA_JP_67	71.5207	125.135
CCA_JP_68	104.241	116.023
CCA_JP_69	102.535	81.8374
CCA_JP_70	105.195	81.8505
CCA_JP_71	99.1745	80.4604
CCA_JP_72	83.1185	127.023
CCA_JP_73	79.4125	89.0553
CCA_JP_74	104.037	105.768
CCA_JP_75	103.055	93.6268
CCA_JP_76	113.051	97.5048
CCA_JP_77	122.142	107.974
CCA_JP_78	118.685	117.096
CCA_JP_79	82.294	90.5918
CCA_JP_80	98.7766	104.811
CCA_JP_81	97.9427	93.4418
CCA_JP_82	84.9018	87.8161
CCA_JP_83	89.1715	104.664
CCA_JP_84	81.9356	97.0041
CCA_JP_85	94.4193	96.941
CCA_JP_86	93.2204	87.4316
CCA_JP_87	105.079	105.784
CCA_JP_88	91.7797	75.8144
CCA_JP_89	86.9145	93.7429
CCA_JP_90	77.7813	79.2926
CCA_JP_91	78.2011	90.9902
CCA_JP_92	76.128	83.6004
CCA_JP_93	94.4703	80.7619
CCA_JP_94	89.9336	72.0461
CCA_JP_95	104.843	117.318
CCA_JP_96	109.334	108.886
CCA_JP_97	162.455	104.94
CCA_JP_98	100.38	83.5727
CCA_JP_99	123.002	78.5124
CCA_JP_100	98.8177	109.085
CCA_JP_101	105.756	105.732
CCA_JP_102	110.944	110.866
CCA_JP_103	127.146	118.232
CCA_JP_104	114.383	113.4
CCA_JP_105	107.84	102.28
CCA_JP_106	100.642	97.5403
CCA_JP_107	100.375	93.94
CCA_JP_108	106.418	100.274
CCA_JP_109	92.8876	110.409
CCA_JP_110	117.549	99.0244
CCA_JP_111	89.468	86.3596
CCA_JP_112	108.097	114.984
CCA_JP_113	95.2883	81.8281
CCA_JP_114	89.5003	85.964
CCA_JP_115	87.7	100.501
CCA_JP_116	114.798	85.2716
CCA_JP_117	98.032	92.0032
CCA_JP_118	95.583	93.1851
CCA_JP_119	102.453	106.265
CCA_JP_120	104.241	96.1022
CCA_JP_121	118.754	88.0728
CCA_JP_122	84.9988	102.159
CCA_JP_123	94.0449	103.508
CCA_JP_124	97.6851	94.7168
CCA_JP_125	87.3842	93.585
CCA_JP_126	112.2	100.256
CCA_JP_127	114.229	105.466
CCA_JP_128	97.9073	81.8249
CCA_JP_129	119.553	101.917
CCA_JP_130	99.9846	104.045
CCA_JP_131	96.1628	103.355
CCA_JP_132	105.259	119.334
CCA_JP_133	114.895	95.1416
CCA_JP_134	110.191	103.296
CCA_JP_135	112.719	107.662
CCA_JP_136	96.6569	110.407
CCA_JP_137	88.628	90.5605
CCA_JP_138	85.8823	84.8873
CCA_JP_139	90.285	94.1855
CCA_JP_140	86.7167	88.9114
CCA_JP_141	77.8173	82.5822
CCA_JP_142	83.7841	82.3
CCA_JP_143	78.9234	83.0325
CCA_JP_144	84.2152	91.9229
CCA_JP_145	96.1427	93.3535
CCA_JP_146	84.2367	77.8317
CCA_JP_147	106.709	79.7621
CCA_JP_148	86.314	97.6618
CCA_JP_149	98.9607	89.3898
CCA_JP_150	94.8475	96.1311
CCA_JP_151	92.7176	95.8135
CCA_JP_152	95.7885	97.0902
CCA_JP_153	81.4686	90.7744
CCA_JP_154	88.7225	96.4222
CCA_JP_155	94.5713	98.886
CCA_JP_156	103.659	95.4624
CCA_JP_157	98.896	94.8653
CCA_JP_158	92.8407	103.107
CCA_JP_159	96.4906	91.3587
CCA_JP_160	113.59	125.214
CCA_JP_161	107.555	114.018
CCA_JP_162	114.033	109.861
CCA_JP_163	113.662	115.785
CCA_JP_164	286.903	289.421
CCA_JP_165	148.175	116.129
CCA_JP_166	107.724	140.917
CCA_JP_167	233.048	110.147
CCA_JP_168	84.2625	78.6338
CCA_JP_169	94.8448	84.1994
CCA_JP_170	70.4246	87.8948
CCA_JP_171	103.511	112.299
CCA_JP_172	93.8563	103.487
CCA_JP_173	103.971	105.679
CCA_JP_174	68.3304	76.6189
CCA_JP_175	117.046	67.2485
CCA_JP_176	106.121	98.0922
CCA_JP_177	123.034	101.124
CCA_JP_178	195.698	196.268
CCA_JP_179	219.716	218.906
CCA_JP_180	357.01	236.266
CCA_JP_181	66.5756	90.1469
CCA_JP_182	68.534	66.3118
CCA_JP_183	71.8575	75.3683
CCA_JP_184	116.996	112.187
CCA_JP_185	112.766	100.106
CCA_JP_186	68.0354	84.3059
CCA_JP_187	119.324	110.001
CCA_JP_188	125.473	167.074
CCA_JP_189	84.7334	167.224
CCA_JP_190	99.327	123.822
CCA_JP_191	91.4438	97.217
CCA_JP_192	98.1371	79.4712
CCA_JP_193	172.345	134.582
CCA_JP_194	118.74	81.6724
CCA_JP_195	111.749	77.6609
CCA_JP_196	74.9562	66.0307
CCA_JP_197	128.232	127.814
CCA_JP_198	80.4211	122.134
CCA_JP_199	92.0571	105.92
CCA_JP_200	98.3574	86.188
CCA_JP_201	85.4981	82.7706
CCA_JP_202	80.6039	103.716
CCA_JP_203	84.7086	66.5654
CCA_JP_204	90.6893	162.693
CCA_JP_205	96.8674	95.6729
CCA_JP_206	86.8214	76.7342
CCA_JP_207	81.8379	76.1318
CCA_JP_208	77.0807	73.0724
CCA_JP_209	93.5304	76.2563
CCA_JP_210	132.33	85.0455
CCA_KR_1	789.791	784.135
CCA_KR_2	740.05	871.61
CCA_RO_8	441.537	422.619
CCA_RO_9	386.748	614.65
CCA_RO_10	519.19	586.331
CCA_RO_11	569.362	522.201
CCA_RO_12	581.982	753.155
CCA_RO_13	492.967	449.81
CCA_RO_14	437.419	485.73
CCA_RO_15	558.298	661.397
CCA_RO_16	792.176	651.411
CCA_RO_17	625.863	600.79
CCA_RO_18	526.077	562.409
CCA_RO_19	612.832	408.078
CCA_RO_20	459.958	505.209
CCA_RO_21	600.606	568.723
CCA_RO_22	638.013	533.173
CCA_RO_23	610.636	625.451
CCA_RO_24	563.283	619.446
CCA_RO_25	561.766	492.705
CCA_RO_26	403.107	489.532
CCA_RO_27	484.888	496.79
CCA_RO_28	487.635	542.574
CCA_RO_29	582.571	573.449
CCA_RO_30	534.592	355.6
CCA_RO_31	537.829	647.19
CCA_RO_32	466.14	569.432
CCA_RO_33	490.236	426.132
CCA_RO_34	638.749	563.823
CCA_RO_35	396.312	420.94
CCA_RO_36	359.296	375.718
CCA_RO_37	381.318	693.604
CCA_RO_38	415.547	369.896
CCA_RO_39	426.424	544.706
CCA_RO_40	497.861	444.977
CCA_SG_21	680.489	697.81
CCA_SG_22	694.342	860.755
CCA_SG_23	615.244	391.604
CCA_SG_24	895.032	782.928
CCA_SG_25	713.006	712.023
CCA_SG_26	605.368	672.976
CCA_SG_27	581.761	465.205
CCA_SG_28	526.489	581.492
CCA_SG_29	669.234	938.09
CCA_SG_30	900.324	765.257
CCA_SG_31	709.956	1151.94
CCA_SG_32	597.555	697.67
CCA_SG_33	656.364	692.086
CCA_SG_34	647.859	711.088
CCA_SG_35	738.249	551.937
CCA_SG_36	994.469	787.068
CCA_SG_37	738.343	749.028
CCA_SG_38	873.753	602.374
CCA_SG_39	736.345	288.274
CCA_SG_40	749.747	987.688
CCA_SG_41	668.916	647.454
CCA_SG_42	542.764	576.256
CCA_SG_43	765.833	711.686
CCA_SG_44	770.135	580.645
CCA_SG_45	668.983	1076.3
CCA_SG_46	902.012	663.492
CCA_SG_47	856.797	797.421
CCA_TH_23	869.319	594.005
CCA_TH_24	920.696	300.802
CCA_TH_25	407.321	629.368
CCA_TH_26	913.077	495.611
CCA_TH_27	736.644	668.396
CCA_TH_28	731.356	752.73
CCA_TH_29	792.768	560.737
CCA_TH_30	560.815	530.645
CCA_TH_31	430.141	414.293
CCA_TH_32	586.455	532.6
CCA_TH_33	621.22	408.408
CCA_TH_34	482.636	443.496
CCA_TH_35	582.661	693.659
CCA_TH_36	586.179	517.78
CCA_TH_37	466.439	463.365
CCA_TH_38	563.891	490.113
CCA_TH_39	577.355	633.744
CCA_TH_40	626.774	625.224
CCA_TH_41	660.16	618.192
CCA_TH_42	623.44	697.377
CCA_TH_43	471.621	546.039
CCA_TH_44	655.8	507.202
CCA_TH_45	579.975	580.947
CCA_TH_46	649.167	598.422
CCA_TH_47	433.144	708.792
CCA_TH_48	721.16	444.901
CCA_TH_49	549.919	560.938
CCA_TH_50	609.68	626.408
CCA_TH_51	554.769	642.142
CCA_TH_52	968.573	639.094
CCA_TH_53	778.727	740.509
CCA_TH_54	729.357	650.705
CCA_TH_55	424.007	410.774
CCA_TH_56	612.845	557.819
CCA_TH_57	502.847	519.698
CCA_TH_58	617.821	473.315
CCA_TH_59	576.972	640.838
CCA_TH_60	590.029	480.264
CCA_TH_61	470.454	524.879
CCA_TH_62	528.776	499.158
CCA_TH_63	563.445	549.976
CCA_TH_64	559.562	580.317
CCA_TH_65	574.551	527.371
CCA_TH_66	513.945	738.15
CCA_TH_67	476.467	410.64
CCA_TH_68	507.976	564.447
CCA_TH_69	569.579	486.928
CCA_TH_70	500.893	552.716
CCA_TH_71	540.36	584.912
CCA_TH_72	696.4	564.582
CCA_TH_73	562.991	483.885
CCA_TH_74	624.065	589.302
CCA_TH_75	508.644	520.344
CCA_TH_76	428.081	520.04
CCA_TH_77	512.132	494.115
CCA_TH_78	586.87	516.02
CCA_TH_79	544.244	509.447
CCA_TH_80	579.519	605.082
CCA_TH_81	665.244	470.486
CCA_TH_82	523.997	532.603
CCA_TH_83	592.162	389.311
CCA_TH_84	545.175	472.616
CCA_TH_85	445.225	472.586
CCA_TH_86	515.362	472.733
CCA_TH_87	696.106	559.141
CCA_TH_88	721.694	696.361
CCA_TH_89	582.463	534.715
CCA_TH_90	581.351	634.76
CCA_TH_91	495.095	471.082
CCA_TH_92	579.387	509.547
CCA_TH_93	519.998	613.322
CCA_TH_94	623.412	502.767
CCA_TH_95	388.081	596.329
CCA_TH_96	618.314	536.831
CCA_TH_97	533.463	526.185
CCA_TH_98	526.392	522.36
CCA_TH_99	633.983	456.749
CCA_TH_100	601.939	628.344
CCA_TH_101	645.147	567.4
CCA_TH_102	503.186	394.005
CCA_TH_103	553.464	477.731
CCA_TH_104	578.8	538.1
CCA_TH_105	643.591	464.606
CCA_TH_106	473.964	632.716
CCA_TH_107	482.212	509.858
CCA_TH_108	514.251	518.019
CCA_TH_109	518.137	547.913
CCA_TH_110	479.156	453.607
CCA_TH_111	490.519	514.83
CCA_TH_112	531.689	411.696
CCA_TH_113	369.092	536.275
CCA_TH_114	486.151	526.319
CCA_TH_115	408.689	442.482
CCA_TH_116	499.275	516.245
CCA_TH_117	627.729	504.53
CCA_TH_118	581.52	590.791
CCA_TH_119	739.466	634.618
CCA_TH_120	645.562	759.603
CCA_TH_121	524.969	688.89
CCA_TH_122	622.325	708.691
CCA_TH_123	746.234	653.32
CCA_TH_124	531.042	544.243
CCA_TH_125	596.56	603.809
CCA_TH_126	1052.67	523.69
CCA_TH_127	589.342	563.849
CCA_TH_128	560.979	687.585
CCA_TH_129	572.841	670.854
Avg	339.997	328.69

## Sheet: TableS5C
Supplementary Table 5C. Gene List Used for Targeted Sequencing
Gene	Genomic region	# targeted regions	Size	Databases	Coverage	# high coverage regions	# low coverage regions
ABCA13	chr7:48211071-48685118	63	16531	Gencode, RefSeq, VEGA	99.6552	62	1
ABCA2	chr9:139902371-139923334	49	8700	Gencode, RefSeq, VEGA	100	49	0
ABCA7	chr19:1041351-1065434	46	7361	Gencode, RefSeq	100	46	0
ABCC1	chr16:16043599-16235148	32	5266	Gencode, RefSeq, VEGA	100	32	0
ACAN	chr15:89379428-89417722	17	7933	Gencode, RefSeq	100	17	0
ACLY	chr17:40024053-40075277	29	4048	Gencode, RefSeq, VEGA	100	29	0
ACVR1B	chr12:52345518-52387904	10	2083	Gencode, RefSeq	100	10	0
ACVR2A	chr2:148602712-148684853	11	1762	Gencode, RefSeq, VEGA	100	11	0
ADAM33	chr20:3649600-3662661	22	2971	Gencode, RefSeq, VEGA	100	22	0
ADAMTS20	chr12:43748002-43945734	40	6809	Gencode, RefSeq	100	40	0
ADAMTSL3	chr15:84324504-84706568	29	5656	Gencode, RefSeq, VEGA	100	29	0
AFF1	chr4:87869676-88056863	22	4225	Gencode, RefSeq, VEGA	100	22	0
AFG3L2	chr18:12329554-12377263	18	2892	Gencode, RefSeq, VEGA	100	18	0
AGPAT6	chr8:41456649-41478530	13	1637	Gencode, RefSeq, VEGA	100	13	0
AKAP6	chr14:32902690-33293989	12	7200	Gencode, RefSeq, VEGA	100	12	0
AKT1	chr14:105236668-105258990	13	1703	Gencode, RefSeq	100	13	0
AKT3	chr1:243663035-244006482	14	1764	Gencode, RefSeq, VEGA	100	14	0
ALDH1A2	chr15:58247385-58357858	15	1953	Gencode, RefSeq, VEGA	100	15	0
ALK	chr2:29416080-30143535	31	5738	Gencode, RefSeq, VEGA	100	31	0
AMER2	chr13:25743732-25745767	1	2036	RefSeq	100	1	0
ANGPT1	chr8:108264073-108509796	10	1708	Gencode, RefSeq, VEGA	100	10	0
ANK1	chr8:41513236-41754008	47	7074	Gencode, RefSeq, VEGA	100	47	0
ANK3	chr10:61802439-62493087	56	15352	Gencode, RefSeq, VEGA	100	56	0
APC	chr5:112043405-112198243	19	9166	Gencode, RefSeq, VEGA	99.4545	18	1
APOB	chr2:21224592-21266827	30	14375	Gencode, RefSeq, VEGA	100	30	0
ARHGEF4	chr2:131672500-131803772	14	5277	Gencode, RefSeq, VEGA	100	14	0
ARID1A	chr1:27022885-27107257	20	7260	Gencode, RefSeq, VEGA	99.4766	20	0
ARID1B	chr6:157099054-157529035	23	7836	Gencode, RefSeq, VEGA	97.6008	22	1
ARID2	chr12:46123610-46298871	24	6067	Gencode, RefSeq, VEGA	99.011	23	1
ARNT	chr1:150784487-150849053	23	2910	Gencode, RefSeq, VEGA	96.0138	21	2
ASAP2	chr2:9347224-9543466	28	3581	Gencode, RefSeq, VEGA	100	28	0
ASTN1	chr1:176826737-177133822	24	4440	Gencode, RefSeq, VEGA	100	24	0
ASTN2	chr9:119187859-120177226	28	4969	Gencode, RefSeq, VEGA	97.1423	26	2
ASXL1	chr20:30946569-31025151	17	5054	Gencode, RefSeq, VEGA	99.4856	16	1
ASXL2	chr2:25964888-26101101	13	4571	Gencode, RefSeq, VEGA	97.7467	12	1
ATF7IP	chr12:14538308-14651017	15	4178	Gencode, RefSeq	100	15	0
ATM	chr11:108098342-108236245	62	10411	Gencode, RefSeq	100	62	0
ATP10A	chr15:25924478-26108253	22	4959	Gencode, RefSeq	100	22	0
AXIN1	chr16:338112-397035	10	2847	Gencode, RefSeq, VEGA	100	10	0
BAP1	chr3:52436294-52443904	17	2599	Gencode, RefSeq, VEGA	100	17	0
BARD1	chr2:215593390-215674303	12	2590	Gencode, RefSeq, VEGA	100	12	0
BBX	chr3:107429298-107524384	16	3306	Gencode, RefSeq, VEGA	100	16	0
BCAR1	chr16:75263399-75301888	14	3262	Gencode, RefSeq, VEGA	100	14	0
BCL2L1	chr20:30253742-30310031	2	742	Gencode, RefSeq, VEGA	100	2	0
BCL9	chr1:147083626-147096770	7	4421	Gencode, RefSeq, VEGA	100	7	0
BCOR	chrX:39909159-39937192	16	5707	Gencode, RefSeq, VEGA	100	16	0
BIRC6	chr2:32582220-32842981	74	16054	Gencode, RefSeq, VEGA	100	74	0
BMI1	chr10:22615369-22618481	9	1161	Gencode, RefSeq, VEGA	100	9	0
BOD1L1	chr4:13571625-13629221	26	9676	RefSeq	100	26	0
BPTF	chr17:65821637-65978414	32	9989	Gencode, RefSeq, VEGA	99.9199	32	0
BRAF	chr7:140426284-140624513	21	2799	Gencode, RefSeq, VEGA	100	21	0
BRCA1	chr17:41197685-41276123	24	6184	Gencode, RefSeq, VEGA	98.9327	23	1
BRCA2	chr13:32890588-32972917	26	10777	Gencode, RefSeq, VEGA	100	26	0
BRD7	chr16:50353112-50402695	18	2346	Gencode, RefSeq, VEGA	100	18	0
BRPF3	chr6:36168090-36198507	13	3977	Gencode, RefSeq, VEGA	100	13	0
BSN	chr3:49592026-49702282	10	11981	Gencode, RefSeq, VEGA	97.9634	9	1
C11ORF30	chr11:76157973-76261200	21	4486	Gencode, RefSeq	100	21	0
CAMTA1	chr1:6845581-7826592	27	5735	Gencode, RefSeq, VEGA	98.8666	26	1
CARD11	chr7:2946262-2998150	24	3945	Gencode, RefSeq, VEGA	100	24	0
CCND1	chr11:69456072-69466060	5	988	Gencode, RefSeq	100	5	0
CCND3	chr6:41903579-41909397	6	1151	Gencode, RefSeq, VEGA	100	6	0
CCNE1	chr19:30303453-30314694	11	1471	Gencode, RefSeq	100	11	0
CD84	chr1:160518036-160549237	8	1349	Gencode, RefSeq, VEGA	100	8	0
CDH2	chr18:25532107-25756996	18	3179	Gencode, RefSeq, VEGA	97.4835	17	1
CDH22	chr20:44803135-44879943	11	2707	Gencode, RefSeq, VEGA	100	11	0
CDH5	chr16:66413231-66437082	11	2575	Gencode, RefSeq, VEGA	100	11	0
CDH8	chr16:61687502-62055317	11	2620	Gencode, RefSeq, VEGA	100	11	0
CDK10	chr16:89748876-89762193	17	1778	Gencode, RefSeq, VEGA	95.3881	15	2
CDK6	chr7:92244444-92462647	7	1121	Gencode, RefSeq, VEGA	100	7	0
CDKN1B	chr12:12870764-12874151	3	800	Gencode, RefSeq, VEGA	100	3	0
CDKN2A	chr9:21968218-21994463	5	1135	Gencode, RefSeq, VEGA	100	5	0
CDKN2B	chr9:22005976-22008962	2	538	Gencode, RefSeq, VEGA	100	2	0
CECR2	chr22:17956132-18032550	20	4913	Gencode, RefSeq, VEGA	100	20	0
CGGBP1	chr3:88104613-88105136	1	524	Gencode, RefSeq, VEGA	100	1	0
CHD5	chr1:6161970-6240093	44	7131	Gencode, RefSeq, VEGA	98.2331	43	1
CNOT10	chr3:32726943-32815113	21	2933	Gencode, RefSeq, VEGA	96.9656	20	1
CNPPD1	chr2:220037298-220041560	8	1393	RefSeq	100	8	0
COL11A1	chr1:103343565-103573744	69	7012	Gencode, RefSeq, VEGA	100	69	0
COL7A1	chr3:48601829-48632602	119	11278	Gencode, RefSeq, VEGA	100	119	0
COMP	chr19:18893715-18902088	19	2654	Gencode, RefSeq	100	19	0
CREB3L4	chr1:153940992-153946551	9	1391	Gencode, RefSeq, VEGA	100	9	0
CREBBP	chr16:3777709-3930131	31	8153	Gencode, RefSeq, VEGA	98.9452	30	1
CSF3R	chr1:36931687-36945107	16	3017	Gencode, RefSeq, VEGA	100	16	0
CSMD1	chr8:2796097-4851948	73	12258	Gencode, RefSeq, VEGA	100	73	0
CSMD3	chr8:113236990-114449093	72	12622	Gencode, RefSeq, VEGA	100	72	0
CTNNA2	chr2:79750329-80875007	22	3581	Gencode, RefSeq, VEGA	100	22	0
CTNNB1	chr3:41265550-41280843	14	2626	Gencode, RefSeq, VEGA	100	14	0
CTNND2	chr5:10973555-11903975	24	4292	Gencode, RefSeq, VEGA	100	24	0
CTTN	chr11:70253394-70282524	18	2470	Gencode, RefSeq, VEGA	100	18	0
CUBN	chr10:16866964-17171774	70	12409	Gencode, RefSeq, VEGA	100	70	0
DAPK1	chr9:90113983-90322289	26	4888	Gencode, RefSeq, VEGA	100	26	0
DDB2	chr11:47236678-47260410	10	1484	Gencode, RefSeq	100	10	0
DDR2	chr1:162688844-162750046	16	3064	Gencode, RefSeq, VEGA	100	16	0
DDX50	chr10:70661131-70706396	15	2514	Gencode, RefSeq, VEGA	100	15	0
DENND4A	chr15:65954179-66048798	35	6513	Gencode, RefSeq	100	35	0
DICER1	chr14:95556825-95599805	26	6289	Gencode, RefSeq	100	26	0
DIDO1	chr20:61510575-61542974	15	7200	Gencode, RefSeq, VEGA	100	15	0
DLC1	chr8:12943310-13357590	20	5356	Gencode, RefSeq, VEGA	100	20	0
DMXL1	chr5:118407255-118582924	44	10027	Gencode, RefSeq, VEGA	100	44	0
DMXL2	chr15:51741171-51914752	44	10057	Gencode, RefSeq, VEGA	100	44	0
DNMT3A	chr2:25457138-25536863	25	3388	Gencode, RefSeq, VEGA	100	25	0
DOPEY2	chr21:37537022-37665879	36	7617	Gencode, RefSeq, VEGA	100	36	0
DPYSL3	chr5:146773588-146889431	15	2394	Gencode, RefSeq, VEGA	100	15	0
E2F2	chr1:23836362-23857295	7	1454	Gencode, RefSeq, VEGA	100	7	0
ECE2	chr3:183967473-184010036	23	3747	Gencode, RefSeq, VEGA	100	23	0
ECT2	chr3:172472311-172538037	25	3467	Gencode, RefSeq, VEGA	100	25	0
EFS	chr14:23826425-23834244	6	1806	Gencode, RefSeq, VEGA	100	6	0
EGFR	chr7:55086961-55273320	32	4734	Gencode, RefSeq, VEGA	100	32	0
EIF4G2	chr11:10819353-10830027	23	3403	Gencode, RefSeq	100	23	0
ELF3	chr1:201980255-201984461	8	1276	Gencode, RefSeq, VEGA	100	8	0
EPHA2	chr1:16451700-16482437	17	3271	Gencode, RefSeq, VEGA	100	17	0
EPHA3	chr3:89156889-89528662	17	3318	Gencode, RefSeq, VEGA	100	17	0
EPPK1	chr8:144940149-144947431	1	7283	Gencode, RefSeq	100	1	0
ERBB2	chr17:37855803-37884307	28	4360	Gencode, RefSeq	100	28	0
ERBB4	chr2:212248330-213403264	29	4552	Gencode, RefSeq, VEGA	100	29	0
ESRRG	chr1:216679944-216896651	9	1655	Gencode, RefSeq, VEGA	98.429	8	1
ESX1	chrX:103494899-103499540	4	1301	Gencode, RefSeq, VEGA	100	4	0
EXT2	chr11:44117793-44265847	15	2649	Gencode, RefSeq	100	15	0
EZH2	chr7:148504728-148544400	21	2876	Gencode, RefSeq, VEGA	100	21	0
FAS	chr10:90749216-90774217	10	1354	Gencode, RefSeq, VEGA	100	10	0
FASTKD2	chr2:207631408-207656536	11	2353	Gencode, RefSeq, VEGA	100	11	0
FAT2	chr5:150885116-150948502	23	13512	Gencode, RefSeq, VEGA	100	23	0
FAT3	chr11:92085269-92624289	28	14488	Gencode, RefSeq, VEGA	98.7714	27	1
FBN2	chr5:127595137-127873306	66	10183	Gencode, RefSeq, VEGA	100	66	0
FBXL13	chr7:102453779-102715227	22	2979	Gencode, RefSeq, VEGA	97.3817	21	1
FBXO15	chr18:71740686-71815030	10	1733	Gencode, RefSeq, VEGA	100	10	0
FBXO31	chr16:87364884-87417360	9	1800	Gencode, RefSeq	100	9	0
FBXO4	chr5:41925402-41941393	8	1390	Gencode, RefSeq, VEGA	95.6835	7	1
FBXW7	chr4:153244023-153332965	14	2898	Gencode, RefSeq	100	14	0
FGF19	chr11:69514020-69518654	3	711	Gencode, RefSeq	100	3	0
FGF23	chr12:4479499-4488758	3	816	Gencode, RefSeq	100	3	0
FGFR1	chr8:38271136-38318634	20	3220	Gencode, RefSeq, VEGA	100	20	0
FGFR2	chr10:123239085-123353341	23	3259	Gencode, RefSeq, VEGA	100	23	0
FGFR3	chr4:1795652-1809424	18	3360	Gencode, RefSeq, VEGA	100	18	0
FGFR4	chr5:176516594-176524687	15	3652	Gencode, RefSeq, VEGA	100	15	0
FH	chr1:241661118-241683032	10	1733	Gencode, RefSeq, VEGA	100	10	0
FHIT	chr3:59737942-60522705	5	544	Gencode, RefSeq, VEGA	100	5	0
FKBP3	chr14:45585391-45603669	7	815	Gencode, RefSeq, VEGA	100	7	0
FOS	chr14:75745676-75748137	4	1223	Gencode, RefSeq	100	4	0
FOXB2	chr9:79634561-79635879	1	1319	Gencode, RefSeq, VEGA	100	1	0
FOXK1	chr7:4714876-4802105	10	2473	Gencode, RefSeq, VEGA	92.3575	9	1
FOXK2	chr17:80477755-80559385	10	2242	Gencode, RefSeq, VEGA	100	10	0
FOXM1	chr12:2967794-2983654	9	2589	Gencode, RefSeq	94.8243	8	1
FOXQ1	chr6:1312930-1314161	1	1232	Gencode, RefSeq, VEGA	100	1	0
FRS3	chr6:41738347-41748181	6	1671	Gencode, RefSeq, VEGA	100	6	0
FSIP2	chr2:186603345-186697963	24	21485	Gencode, RefSeq, VEGA	100	24	0
FYN	chr6:111982932-112041264	12	2010	Gencode, RefSeq, VEGA	100	12	0
GATA3	chr10:8097609-8115996	5	1437	Gencode, RefSeq, VEGA	100	5	0
GATA6	chr18:19751096-19780796	6	1908	Gencode, RefSeq, VEGA	100	6	0
GATM	chr15:45654297-45670661	9	1452	Gencode, RefSeq, VEGA	100	9	0
GLI3	chr7:42003918-42262862	15	5278	Gencode, RefSeq, VEGA	100	15	0
GNA12	chr7:2770805-2883805	7	1715	Gencode, RefSeq, VEGA	100	7	0
GNAS	chr20:57415152-57485894	17	4436	Gencode, RefSeq, VEGA	100	17	0
GPAM	chr10:113913298-113941552	20	2899	Gencode, RefSeq, VEGA	100	20	0
GPR112	chrX:135390927-135519225	24	9776	Gencode, RefSeq, VEGA	100	24	0
GPR98	chr5:89825289-90459727	94	20981	Gencode, RefSeq, VEGA	100	94	0
GPT	chr8:145729678-145732393	11	1711	Gencode, RefSeq	100	11	0
GTF3C1	chr16:27472661-27561221	37	7070	Gencode, RefSeq	100	37	0
HACE1	chr6:105177527-105307527	27	3368	Gencode, RefSeq, VEGA	97.6247	25	2
HAT1	chr2:172779001-172848276	11	1480	Gencode, RefSeq, VEGA	100	11	0
HCFC1	chrX:153214788-153236301	26	6763	Gencode, RefSeq, VEGA	100	26	0
HDAC2	chr6:114262212-114292364	14	2069	Gencode, RefSeq, VEGA	100	14	0
HECTD3	chr1:45469154-45476939	21	3074	Gencode, RefSeq, VEGA	100	21	0
HIPK3	chr11:33307951-33375124	16	3968	Gencode, RefSeq, VEGA	100	16	0
HIST1H3C	chr6:26045629-26046059	1	431	Gencode, RefSeq, VEGA	100	1	0
HLCS	chr21:38126537-38311193	9	2361	Gencode, RefSeq, VEGA	100	9	0
HMCN1	chr1:185703902-186159020	107	19048	Gencode, RefSeq, VEGA	100	107	0
HMGA2	chr12:66219041-66357082	10	944	Gencode, RefSeq	79.3432	9	1
HNF1A	chr12:121416562-121440298	12	2729	Gencode, RefSeq, VEGA	100	12	0
HSF1	chr8:145515430-145538003	14	1954	Gencode, RefSeq	100	14	0
HUWE1	chrX:53560260-53681061	83	15034	Gencode, RefSeq, VEGA	100	83	0
HYOU1	chr11:118915816-118927124	29	3900	Gencode, RefSeq	100	29	0
IDH1	chr2:209101793-209116285	8	1408	Gencode, RefSeq, VEGA	100	8	0
IDH2	chr15:90627488-90645632	11	1579	Gencode, RefSeq, VEGA	100	11	0
IGLON5	chr19:51815092-51832023	8	1171	Gencode, RefSeq, VEGA	100	8	0
IKBKB	chr8:42128879-42188959	24	3336	Gencode, RefSeq, VEGA	100	24	0
ITCH	chr20:32981608-33095609	24	3192	Gencode, RefSeq, VEGA	95.52	23	1
JAK3	chr19:17937542-17955236	23	3987	Gencode, RefSeq	100	23	0
JARID2	chr6:15246761-15521062	21	4402	Gencode, RefSeq, VEGA	100	21	0
JUN	chr1:59247737-59248752	1	1016	Gencode, RefSeq, VEGA	100	1	0
KAT2A	chr17:40265657-40273332	18	2874	Gencode, RefSeq, VEGA	100	18	0
KAT6B	chr10:76602606-76790814	16	6542	RefSeq	100	16	0
KCNA4	chr11:30032254-30034235	1	1982	Gencode, RefSeq	100	1	0
KCNH1	chr1:210856613-211307297	11	3190	Gencode, RefSeq, VEGA	100	11	0
KDM1B	chr6:18160117-18222233	20	2872	Gencode, RefSeq, VEGA	100	20	0
KDM3B	chr5:137688475-137771399	25	5793	Gencode, RefSeq, VEGA	99.5339	24	1
KDM6A	chrX:44732788-44970666	31	5090	Gencode, RefSeq, VEGA	100	31	0
KDR	chr4:55946098-55991470	30	4671	Gencode, RefSeq, VEGA	100	30	0
KIF2B	chr17:51900385-51902426	1	2042	Gencode, RefSeq	100	1	0
KRAS	chr12:25362719-25398328	5	787	Gencode, RefSeq	100	5	0
LAMA1	chr18:6942068-7117729	63	10692	Gencode, RefSeq, VEGA	100	63	0
LAMA2	chr6:129204381-129837502	67	10736	Gencode, RefSeq, VEGA	99.7578	66	1
LAMA3	chr18:21269638-21534622	78	11876	Gencode, RefSeq, VEGA	98.7285	77	1
LASP1	chr17:37026433-37076338	8	1000	Gencode, RefSeq, VEGA	100	8	0
LDB1	chr10:103867840-103879877	11	1456	Gencode, RefSeq, VEGA	100	11	0
LGI1	chr10:95517892-95557570	8	1834	Gencode, RefSeq, VEGA	100	8	0
LMO7	chr13:76195820-76432159	34	6045	Gencode, RefSeq, VEGA	100	34	0
LRP1B	chr2:140990745-142888308	93	15845	Gencode, RefSeq, VEGA	99.7286	92	1
LRP2	chr2:169985163-170218919	79	15592	Gencode, RefSeq, VEGA	100	79	0
LRRIQ1	chr12:85431945-85638729	26	5693	Gencode, RefSeq	100	26	0
LTN1	chr21:30302760-30365274	32	6226	Gencode, RefSeq	100	32	0
LYVE1	chr11:10580648-10590089	6	1089	Gencode, RefSeq	100	6	0
MAFB	chr20:39316509-39317500	1	992	Gencode, RefSeq, VEGA	100	1	0
MAP2K4	chr17:11924194-12044587	13	1502	Gencode, RefSeq	100	13	0
MAP2K7	chr19:7968820-7977326	11	1679	Gencode, RefSeq, VEGA	100	11	0
MAP3K1	chr5:56111391-56189517	20	4939	Gencode, RefSeq, VEGA	100	20	0
MAPK4	chr18:48190319-48256234	5	1864	Gencode, RefSeq	100	5	0
MARCKS	chr6:114178912-114181765	2	1039	Gencode, RefSeq, VEGA	100	2	0
MARK4	chr19:45754837-45805978	17	2769	Gencode, RefSeq	100	17	0
MAX	chr14:65472912-65569067	8	1030	Gencode, RefSeq, VEGA	100	8	0
MCC	chr5:112361049-112824121	21	3620	Gencode, RefSeq, VEGA	98.895	20	1
MCM5	chr22:35796422-35820258	18	2668	Gencode, RefSeq, VEGA	100	18	0
MCM6	chr2:136598395-136633945	17	2806	Gencode, RefSeq, VEGA	100	17	0
MCM9	chr6:119135977-119252898	12	3708	Gencode, RefSeq, VEGA	100	12	0
MDM1	chr12:68689024-68726035	16	2743	Gencode, RefSeq	100	16	0
MDM2	chr12:69202248-69233639	14	1945	Gencode, RefSeq, VEGA	94.1902	13	1
MED12	chrX:70338595-70362078	45	7498	Gencode, RefSeq, VEGA	99.5465	44	1
MEN1	chr11:64571796-64577591	9	2028	Gencode, RefSeq, VEGA	100	9	0
MET	chr7:116335801-116436188	21	4779	Gencode, RefSeq, VEGA	98.6817	20	1
MKL1	chr22:40807384-40915499	13	3332	Gencode, RefSeq, VEGA	100	13	0
MLH1	chr3:37035029-37107120	20	2711	Gencode, RefSeq, VEGA	100	20	0
MLL2	chr12:49415553-49449117	54	17694	Gencode	99.7287	54	0
MLL3	chr7:151833907-152132881	62	16276	Gencode, VEGA	99.6375	61	1
MLLT11	chr1:151039691-151039983	1	293	Gencode, RefSeq, VEGA	100	1	0
MLLT6	chr17:36861876-36881861	21	3861	Gencode, RefSeq, VEGA	100	21	0
MRAS	chr3:138091716-138121121	5	727	Gencode, RefSeq, VEGA	100	5	0
MSH2	chr2:47630321-47739583	18	3344	Gencode, RefSeq, VEGA	97.9964	17	1
MSH3	chr5:79950537-80171691	24	3894	Gencode, RefSeq, VEGA	100	24	0
MSH4	chr1:76262661-76378582	20	3211	Gencode, RefSeq, VEGA	100	20	0
MSH6	chr2:48010363-48034009	10	4318	Gencode, RefSeq, VEGA	100	10	0
MSL3	chrX:11776373-11793208	14	1992	Gencode, RefSeq, VEGA	100	14	0
MUC1	chr1:155158601-155162644	10	2080	Gencode, RefSeq, VEGA	100	10	0
MUC16	chr19:8959598-9091824	84	45208	Gencode, RefSeq	100	84	0
MUC17	chr7:100663407-100701335	13	13742	Gencode, RefSeq, VEGA	100	13	0
MUC2	chr11:1074892-1104273	50	9501	Gencode, RefSeq, VEGA	90.4221	49	1
MUC4	chr3:195474037-195538698	26	16784	Gencode, RefSeq, VEGA	100	26	0
MUC6	chr11:1013446-1036665	33	7980	Gencode, RefSeq	100	33	0
MYC	chr8:128748830-128753214	3	1425	Gencode, RefSeq, VEGA	100	3	0
NCK2	chr2:106471510-106509642	3	1203	Gencode, RefSeq, VEGA	100	3	0
NCOA2	chr8:71025857-71128990	22	4843	Gencode, RefSeq, VEGA	100	22	0
NCOA3	chr20:46250982-46282171	21	4725	Gencode, RefSeq, VEGA	100	21	0
NCOR1	chr17:15935600-16097893	47	8523	Gencode, RefSeq, VEGA	100	47	0
NDC80	chr18:2572975-2616583	17	2284	Gencode, RefSeq, VEGA	98.4676	16	1
NEB	chr2:152342264-152589680	183	29442	Gencode, RefSeq, VEGA	100	183	0
NEK4	chr3:52745783-52804772	17	3039	Gencode, RefSeq, VEGA	90.1283	15	2
NF1	chr17:29422318-29705959	60	9902	Gencode, RefSeq, VEGA	100	60	0
NFATC4	chr14:24834874-24846921	16	3505	Gencode, RefSeq, VEGA	98.2882	15	1
NFKB1	chr4:103432080-103537761	24	3414	Gencode, RefSeq, VEGA	98.9162	23	1
NFKB2	chr10:104155707-104162143	22	3143	Gencode, RefSeq, VEGA	100	22	0
NKX2-1	chr14:36986473-36989344	4	1317	Gencode, RefSeq, VEGA	100	4	0
NLRP1	chr17:5405124-5487287	18	4853	Gencode, RefSeq	97.6715	17	1
NOTCH1	chr9:139390513-139440248	34	8348	Gencode, RefSeq, VEGA	100	34	0
NOTCH2	chr1:120457919-120612085	38	9195	Gencode, RefSeq, VEGA	100	38	0
NOTCH4	chr6:32163204-32191715	30	6612	Gencode, RefSeq, VEGA	100	30	0
NOV	chr8:120428763-120435382	5	1174	Gencode, RefSeq, VEGA	100	5	0
NR2F1	chr5:92920720-92929558	3	1332	Gencode, RefSeq, VEGA	97.5225	3	0
NRAS	chr1:115251146-115258791	4	650	Gencode, RefSeq, VEGA	100	4	0
NSD1	chr5:176562095-176722470	25	8793	Gencode, RefSeq, VEGA	98.2031	23	2
NUP214	chr9:134000983-134108884	38	7350	Gencode, RefSeq, VEGA	100	38	0
OBSCN	chr1:228399475-228566506	117	30353	Gencode, RefSeq, VEGA	100	117	0
OGT	chrX:70753140-70793654	23	3698	Gencode, RefSeq, VEGA	96.8361	22	1
OR10Z1	chr1:158565294-158577180	2	997	Gencode, RefSeq, VEGA	100	2	0
P4HTM	chr3:49027680-49044350	9	1875	Gencode, RefSeq, VEGA	100	9	0
PAF1	chr19:39876545-39881514	15	2012	Gencode, RefSeq	97.0179	14	1
PAK1	chr11:77034172-77103575	16	2025	Gencode, RefSeq	100	16	0
PAK7	chr20:9520099-9624986	8	2320	Gencode, RefSeq, VEGA	100	8	0
PALB2	chr16:23614770-23652488	13	3821	Gencode, RefSeq	100	13	0
PAX5	chr9:36840516-37034038	11	1484	Gencode, RefSeq, VEGA	100	11	0
PBRM1	chr3:52582069-52713737	31	5735	Gencode, RefSeq, VEGA	98.1517	30	1
PBX1	chr1:164529050-164853809	11	1597	Gencode, RefSeq, VEGA	100	11	0
PCDH10	chr4:134071286-134111325	7	3340	Gencode, RefSeq, VEGA	100	7	0
PCDHA12	chr5:140255048-140389532	4	2918	Gencode, RefSeq, VEGA	100	4	0
PCDHA13	chr5:140261844-140389831	5	3054	Gencode, RefSeq, VEGA	100	5	0
PCLO	chr7:82387881-82791918	29	16306	Gencode, RefSeq, VEGA	100	29	0
PDE4DIP	chr1:144852344-145075872	53	10377	Gencode, RefSeq, VEGA	100	53	0
PDGFA	chr7:538191-559855	9	1167	Gencode, RefSeq, VEGA	100	9	0
PDGFRB	chr5:149495316-149516620	22	3795	Gencode, RefSeq, VEGA	100	22	0
PEG3	chr19:57325033-57336033	7	4913	RefSeq	100	7	0
PELP1	chr17:4574724-4607566	17	3883	RefSeq	100	17	0
PIGR	chr1:207103653-207113886	10	2495	Gencode, RefSeq, VEGA	100	10	0
PIK3C2A	chr11:17111275-17191298	32	5701	Gencode, RefSeq	100	32	0
PIK3C2G	chr12:18435006-18800972	32	5105	Gencode, RefSeq	100	32	0
PIK3CA	chr3:178916604-178952162	20	3609	Gencode, RefSeq, VEGA	100	20	0
PIK3R1	chr5:67522494-67593439	19	2779	Gencode, RefSeq, VEGA	100	19	0
PIK3R3	chr1:46509335-46642153	12	1875	Gencode, RefSeq, VEGA	100	12	0
PLCD1	chr3:38049254-38071040	16	2688	Gencode, RefSeq, VEGA	100	16	0
PLEC	chr8:144990335-145049547	39	15508	Gencode, RefSeq	100	39	0
PLEKHG1	chr6:151054808-151162042	15	4458	Gencode, RefSeq, VEGA	100	15	0
PMEPA1	chr20:56227099-56285529	7	1204	Gencode, RefSeq, VEGA	100	7	0
PMS1	chr2:190656526-190742172	16	3397	Gencode, RefSeq, VEGA	97.0562	15	1
POLD3	chr11:74303694-74351821	12	1645	Gencode, RefSeq	100	12	0
POLE	chr12:133201273-133413397	52	8169	Gencode, RefSeq	100	52	0
PPFIA4	chr1:203008127-203045528	30	4302	Gencode, RefSeq, VEGA	100	30	0
PPP1R12A	chr12:80169699-80328721	25	3610	Gencode, RefSeq	100	25	0
PRDM11	chr11:45117347-45249720	8	3861	Gencode, RefSeq	100	8	0
PREX2	chr8:68864620-69143623	49	6348	Gencode, RefSeq, VEGA	100	49	0
PRKCI	chr3:169940448-170020925	18	2151	Gencode, RefSeq, VEGA	100	18	0
PTEN	chr10:89624217-89725239	9	1392	Gencode, RefSeq, VEGA	100	9	0
PTPRE	chr10:129785616-129883421	22	2728	Gencode, RefSeq, VEGA	100	22	0
PTPRT	chr20:40709509-41818383	33	5112	Gencode, RefSeq, VEGA	100	33	0
PXDN	chr2:1637966-1748237	24	5042	Gencode, RefSeq, VEGA	100	24	0
RADIL	chr7:4838999-4917780	14	3508	Gencode, RefSeq, VEGA	100	14	0
RARG	chr12:53605450-53621339	9	1812	Gencode, RefSeq, VEGA	100	9	0
RASA1	chr5:86564160-86688155	30	3967	Gencode, RefSeq, VEGA	98.6892	29	1
RASGRF2	chr5:80256548-80521599	28	4296	Gencode, RefSeq, VEGA	100	28	0
RB1	chr13:48878039-49054217	27	3327	Gencode, RefSeq, VEGA	100	27	0
RBL1	chr20:35627152-35724341	22	3656	Gencode, RefSeq, VEGA	100	22	0
RECQL	chr12:21623118-21652514	14	2230	Gencode, RefSeq	100	14	0
REG3A	chr2:79384342-79386541	5	628	Gencode, RefSeq, VEGA	100	5	0
REST	chr4:57776795-57813587	4	3413	Gencode, RefSeq, VEGA	98.7108	3	1
RET	chr10:43572697-43623727	20	3777	Gencode, RefSeq, VEGA	100	20	0
RGS7	chr1:240939453-241519086	18	1899	Gencode, RefSeq, VEGA	100	18	0
RHBDF1	chr16:108329-115023	18	3238	Gencode, RefSeq, VEGA	100	18	0
RIMS1	chr6:72596717-73110426	42	6140	Gencode, RefSeq, VEGA	99.1531	40	2
RNF213	chr17:78237471-78367308	69	17473	Gencode, RefSeq, VEGA	100	69	0
RNF43	chr17:56432294-56492948	9	2532	Gencode, RefSeq	100	9	0
ROBO1	chr3:78648053-79639071	35	5944	Gencode, RefSeq, VEGA	100	35	0
ROBO2	chr3:75986635-77695219	32	5516	Gencode, RefSeq, VEGA	100	32	0
ROBO3	chr11:124735464-124751156	28	4815	Gencode, RefSeq	100	28	0
ROR2	chr9:94456634-94712255	12	3267	Gencode, RefSeq, VEGA	100	12	0
ROS1	chr6:117609645-117746829	45	7978	Gencode, RefSeq, VEGA	100	45	0
RPA1	chr17:1733378-1800479	17	2191	Gencode, RefSeq, VEGA	100	17	0
RPAP1	chr15:41809730-41829333	24	4662	Gencode, RefSeq, VEGA	100	24	0
RPL22	chr1:6246722-6259643	4	467	Gencode, RefSeq, VEGA	100	4	0
RPS6KA4	chr11:64126698-64138962	17	2659	Gencode, RefSeq, VEGA	100	17	0
RPS6KA6	chrX:83319275-83442917	23	2779	Gencode, RefSeq, VEGA	100	23	0
RYR2	chr1:237205812-237995957	111	17285	Gencode, RefSeq, VEGA	100	111	0
SACS	chr13:23903546-23985388	10	14008	Gencode, RefSeq, VEGA	100	10	0
SBNO1	chr12:123780445-123834998	31	4811	Gencode, RefSeq	100	31	0
SDHAF2	chr11:61197609-61213553	4	581	Gencode, RefSeq	100	4	0
SDHB	chr1:17345366-17380524	8	1003	Gencode, RefSeq, VEGA	100	8	0
SDHD	chr11:111957622-111990025	6	719	Gencode, RefSeq	77.886	4	2
SETD2	chr3:47058573-47205424	27	8312	Gencode, RefSeq, VEGA	98.9774	24	3
SETDB1	chr1:150899244-150936850	22	4438	Gencode, RefSeq, VEGA	100	22	0
SF3B1	chr2:198257017-198299733	27	4585	Gencode, RefSeq, VEGA	100	27	0
SIRT6	chr19:4174604-4182546	8	1228	Gencode, RefSeq	100	8	0
SLC22A23	chr6:3273279-3456803	14	2677	Gencode, RefSeq, VEGA	97.7587	13	1
SLC5A5	chr19:17983119-18004696	15	2232	Gencode, RefSeq	100	15	0
SLIT2	chr4:20255429-20622048	42	5698	Gencode, RefSeq, VEGA	100	42	0
SLTM	chr15:59172188-59225774	21	3525	Gencode, RefSeq, VEGA	100	21	0
SMAD4	chr18:48573407-48604847	13	1999	Gencode, RefSeq, VEGA	100	13	0
SMARCA2	chr9:2029013-2192749	35	5592	Gencode, RefSeq, VEGA	99.9463	35	0
SMARCA4	chr19:11094818-11172502	39	6021	Gencode, RefSeq	99.8505	39	0
SMARCB1	chr22:24129347-24176377	9	1392	Gencode, RefSeq, VEGA	100	9	0
SMG1	chr16:18820881-18937373	63	12249	Gencode, RefSeq	100	63	0
SOX9	chr17:70117523-70120538	3	1590	Gencode, RefSeq	100	3	0
SPA17	chr11:124545151-124564352	4	536	Gencode, RefSeq	100	4	0
SPHKAP	chr2:228846423-229046324	12	5343	Gencode, RefSeq, VEGA	100	12	0
SPOP	chr17:47677730-47700182	12	1441	Gencode, RefSeq, VEGA	100	12	0
SPTA1	chr1:158581044-158656317	52	8300	Gencode, RefSeq, VEGA	100	52	0
SRCAP	chr16:30712136-30751064	32	10333	Gencode, RefSeq, VEGA	100	32	0
SRPK1	chr6:35803071-35888843	19	2938	Gencode, RefSeq, VEGA	96.1198	18	1
SRPK2	chr7:104758275-105029827	20	2920	Gencode, RefSeq, VEGA	100	20	0
ST14	chr11:130029865-130079728	19	3094	Gencode, RefSeq	100	19	0
STAC3	chr12:57637585-57643429	11	1315	Gencode, RefSeq	100	11	0
STK11	chr19:1206903-1226656	9	1482	Gencode, RefSeq	100	9	0
STK4	chr20:43595200-43703827	12	1788	Gencode, RefSeq, VEGA	100	12	0
SYNE1	chr6:152443561-152949476	151	30352	Gencode, RefSeq, VEGA	100	151	0
SYT1	chr12:79611290-79842914	8	1429	Gencode, RefSeq, VEGA	100	8	0
TACC1	chr8:38599938-38709553	18	3109	Gencode, RefSeq, VEGA	100	18	0
TAF10	chr11:6632143-6633430	5	757	Gencode, RefSeq, VEGA	100	5	0
TAF4B	chr18:23806888-23969986	16	2949	Gencode, RefSeq	100	16	0
TAL1	chr1:47685382-47691570	3	1062	Gencode, RefSeq, VEGA	100	3	0
TBX2	chr17:59477528-59485877	7	2283	Gencode, RefSeq, VEGA	100	7	0
TENM1	chrX:123514376-124097612	32	8839	RefSeq	100	32	0
TENM2	chr5:166711833-167689825	29	8878	RefSeq	100	29	0
TERT	chr5:1253833-1295114	16	3719	Gencode, RefSeq, VEGA	100	16	0
TERT:PROMOTER	chr5:1294815-1295580	1	766	CustomRegion	100	1	0
TET1	chr10:70332086-70451581	12	6738	Gencode, RefSeq, VEGA	100	12	0
TET2	chr4:106111617-106197686	10	6365	Gencode, RefSeq, VEGA	100	10	0
TET3	chr2:74229895-74329313	11	5329	Gencode, RefSeq, VEGA	100	11	0
TGFBR2	chr3:30648366-30733101	9	2067	Gencode, RefSeq, VEGA	100	9	0
THBS2	chr6:169617907-169650889	22	3964	Gencode, RefSeq, VEGA	100	22	0
THBS3	chr1:155165622-155177677	23	3331	Gencode, RefSeq, VEGA	100	23	0
TIA1	chr2:70439841-70475686	15	1906	Gencode, RefSeq, VEGA	100	15	0
TIMP3	chr22:33197978-33255374	5	768	Gencode, RefSeq, VEGA	100	5	0
TLE4	chr9:82187696-82340069	27	3355	Gencode, RefSeq, VEGA	98.778	26	1
TNN	chr1:175046545-175116217	18	4260	Gencode, RefSeq, VEGA	100	18	0
TONSL	chr8:145654516-145669807	26	4657	Gencode, RefSeq	100	26	0
TP53	chr17:7565247-7579922	14	1697	Gencode, RefSeq, VEGA	94.343	13	1
TP73	chr1:3598920-3649653	14	2230	Gencode, RefSeq, VEGA	100	14	0
TPI1	chr12:6976610-6979557	7	1001	Gencode, RefSeq, VEGA	100	7	0
TPR	chr1:186283093-186344770	52	8360	Gencode, RefSeq, VEGA	100	52	0
TRIM56	chr7:100730584-100735027	2	2407	Gencode, RefSeq, VEGA	95.0561	1	1
TRIM58	chr1:248020539-248039801	6	1581	Gencode, RefSeq, VEGA	100	6	0
TSC1	chr9:135771612-135804269	21	3987	Gencode, RefSeq, VEGA	100	21	0
UNC5C	chr4:96090375-96470018	18	3226	Gencode, RefSeq, VEGA	100	18	0
USP24	chr1:55534708-55680796	68	9223	Gencode, RefSeq, VEGA	100	68	0
USP7	chr16:8987845-9057152	32	4052	Gencode, RefSeq	97.5568	31	1
VAV3	chr1:108115943-108507501	30	3381	Gencode, RefSeq, VEGA	100	30	0
VEZT	chr12:95611617-95694459	18	2839	Gencode, RefSeq	97.2526	16	2
WIF1	chr12:65445119-65514981	11	1414	Gencode, RefSeq	94.9081	10	1
WNT5B	chr12:1740511-1755428	4	1160	Gencode, RefSeq, VEGA	100	4	0
WRAP53	chr17:7591957-7606814	10	2104	Gencode, RefSeq, VEGA	100	10	0
WRN	chr8:30915954-31030628	34	4979	Gencode, RefSeq, VEGA	98.0719	33	1
WT1	chr11:32410594-32456901	11	1784	Gencode, RefSeq, VEGA	100	11	0
XIRP2	chr2:167759983-168115883	11	12515	Gencode, RefSeq, VEGA	100	11	0
YEATS4	chr12:69753743-69784106	7	824	Gencode, RefSeq	100	7	0
YY1	chr14:100705572-100743947	5	1345	Gencode, RefSeq, VEGA	100	5	0
ZEB2	chr2:145121053-145274927	13	4125	Gencode, RefSeq, VEGA	99.7333	13	0
ZNF318	chr6:43299503-43337113	11	7138	Gencode, RefSeq, VEGA	100	11	0
ZNF415	chr19:53611620-53625939	6	2009	Gencode, RefSeq	94.1264	5	1
ZNF521	chr18:22642666-22932120	12	4385	Gencode, RefSeq	98.4721	10	2
ZNF90	chr19:20188932-20232153	6	2044	Gencode, RefSeq, VEGA	93.4931	5	1
