# Supplementary material for: Whole-Genome and Epigenomic Landscapes of Etiologically Distinct Subtypes of Cholangiocarcinoma
Source: Oxford University Press journal article supplement (doi:10.1158/2159-8290.cd-17-0368), 2017-06-30
Supplement: 21598290cd170368-sup-181437_2_supp_4118310_krylkl.xlsx [file 21598290cd170368-sup-181437_2_supp_4118310_krylkl.xlsx]

## Sheet: TableS1A
Supplementary Table 1A. Summary of Patients and Clinical Data
Sample ID	Type (Fluke-Pos/Fluke-Neg)	Country	Sex	Age at surgery	Anatomical subtype	Primary Sclerosing cholangitis	HBV	HCV	Histology	TNM staging	Stage	Vital state (1=Dead)	Overall survival (days)	Whole Genome sequencing	Targeted Sequencing	Exome sequencing (Nakamura H. et.al. Nat. Genet. 2015)	SNP array	Gene expression profiling	DNA methylation profiling	Cluster	Expanded cluster
CCA_BR_1	Fluke-Neg	Brazil	M	53	Intrahepatic	No	Negative	Negative	Moderate	T3NxMx	N/A	1	26	No	Yes	No	Yes	Yes	Yes	4	4
CCA_BR_2	Fluke-Neg	Brazil	F	49	Intrahepatic	No	Negative	Negative	Moderate	T3N0M1	IVB	1	566	No	Yes	No	Yes	Yes	Yes	4	4
CCA_BR_3	Fluke-Neg	Brazil	M	61	Intrahepatic	No	N/A	N/A	Moderate	T1N0M0	IA	1	7	No	Yes	No	Yes	No	Yes	N/A	N/A
CCA_CH_1	Fluke-Neg	China	F	49	Perihilar	N/A	Positive	Negative	Moderate	T2bN1M0	IIB	1	425	Yes	No	No	Yes	No	Yes	N/A	2
CCA_CH_2	Fluke-Pos	China	F	61	Perihilar	N/A	Negative	Negative	Poor	T2aN0M0	II	N/A	N/A	Yes	No	No	Yes	No	Yes	N/A	2
CCA_CH_3	Fluke-Neg	China	M	46	Perihilar	N/A	Negative	Negative	Poor	T2bN0M0	II	1	346	Yes	No	No	Yes	No	Yes	N/A	2
CCA_CH_4	Fluke-Neg	China	M	46	Extrahepatic	N/A	Negative	Negative	Moderate	T3N1M0	IIIB	0	486	Yes	No	No	Yes	No	Yes	N/A	2
CCA_CH_5	Fluke-Neg	China	M	75	Intrahepatic	N/A	Negative	Negative	N/A	T1N0M0	I	0	623	Yes	No	No	Yes	No	Yes	N/A	2
CCA_CH_6	Fluke-Neg	China	F	59	Intrahepatic	N/A	Negative	Negative	Moderate	T3N0M0	III	0	608	Yes	No	No	No	No	Yes	N/A	N/A
CCA_CH_7	Fluke-Neg	China	F	71	Intrahepatic	N/A	Negative	Negative	Moderate-Poor	T1N1M0	IVA	1	69	Yes	No	No	Yes	No	Yes	N/A	2
CCA_CH_8	Fluke-Neg	China	M	60	Intrahepatic	N/A	Negative	Negative	Moderate-Poor	T2bN0M0	II	1	532	Yes	No	No	Yes	No	Yes	N/A	2
CCA_FR_1	Fluke-Neg	France	F	49	Intrahepatic	No	Negative	Negative	Poor	T1NxM0	N/A	0	2044	No	Yes	No	Yes	Yes	Yes	4	4
CCA_FR_2	Fluke-Neg	France	M	78	Intrahepatic	No	Negative	Negative	Moderate	T3NxM0	N/A	0	328	No	Yes	No	Yes	Yes	Yes	4	4
CCA_FR_3	Fluke-Neg	France	F	60	Intrahepatic	No	Negative	Negative	Poor	T3NxM0	N/A	0	280	No	Yes	No	Yes	Yes	Yes	1	1
CCA_FR_4	Fluke-Neg	France	M	75	Intrahepatic	No	Negative	Negative	Poor	T3N1M0	IVA	1	158	No	Yes	No	Yes	Yes	Yes	4	4
CCA_FR_5	Fluke-Neg	France	F	76	Intrahepatic	No	Negative	Negative	Moderate	T3NxM0	N/A	0	529	No	Yes	No	Yes	No	Yes	N/A	4
CCA_FR_6	Fluke-Neg	France	M	68	Intrahepatic	No	Negative	Negative	Moderate	T1N0M0	I	0	1924	No	Yes	No	Yes	No	Yes	N/A	4
CCA_FR_7	Fluke-Neg	France	F	77	Intrahepatic	No	Negative	Negative	Well	T3N1M0	IVA	0	248	No	Yes	No	Yes	Yes	Yes	4	4
CCA_FR_8	Fluke-Neg	France	F	73	Intrahepatic	No	Negative	Negative	Moderate	T3NxM0	N/A	0	2225	No	Yes	No	Yes	Yes	Yes	4	4
CCA_FR_9	Fluke-Neg	France	M	62	Intrahepatic	No	Negative	Negative	Moderate	T4NxM0	IVA	0	1689	No	Yes	No	Yes	Yes	Yes	4	4
CCA_FR_10	Fluke-Neg	France	M	29	Intrahepatic	Yes	Negative	Negative	Well	T3N1M0	IVA	0	3217	No	Yes	No	Yes	Yes	Yes	3	3
CCA_FR_11	Fluke-Neg	France	M	45	Intrahepatic	No	Negative	Negative	Well	T2N0M0	II	0	3114	No	Yes	No	Yes	Yes	Yes	4	4
CCA_FR_12	Fluke-Neg	France	F	43	Intrahepatic	No	Negative	Negative	Moderate	T4NxM0	IVA	0	267	No	Yes	No	Yes	Yes	Yes	4	4
CCA_FR_13	Fluke-Neg	France	M	51	Intrahepatic	No	Negative	Negative	Moderate	T3NxM0	N/A	1	1401	No	Yes	No	Yes	Yes	Yes	4	4
CCA_FR_14	Fluke-Neg	France	F	52	Intrahepatic	No	Negative	Positive	Well	T3NxM0	N/A	0	219	No	Yes	No	Yes	Yes	Yes	2	2
CCA_FR_15	Fluke-Neg	France	M	56	Intrahepatic	No	Negative	Negative	Well	T4N0M0	IVA	0	1531	No	Yes	No	Yes	Yes	Yes	4	4
CCA_FR_16	Fluke-Neg	France	F	78	Intrahepatic	No	Negative	Negative	Moderate	T3NxM0	N/A	0	19	No	Yes	No	Yes	Yes	Yes	3	3
CCA_IT_1	Fluke-Neg	Italy	F	69	Intrahepatic	No	N/A	N/A	Moderate	T3N1M0	IVA	0	1071	Yes	No	No	Yes	No	Yes	N/A	4
CCA_IT_2	Fluke-Neg	Italy	F	76	Intrahepatic	No	N/A	N/A	N/A	T3N0M0	III	0	807	Yes	No	No	Yes	No	Yes	N/A	1
CCA_IT_3	Fluke-Neg	Italy	M	53	Intrahepatic	No	N/A	N/A	Moderate	T3N1M0	IVA	1	296	Yes	No	No	Yes	No	Yes	N/A	2
CCA_IT_4	Fluke-Neg	Italy	M	73	Intrahepatic	No	N/A	N/A	Moderate	T3N0M0	III	0	168	Yes	No	No	Yes	No	Yes	N/A	2
CCA_IT_5	Fluke-Neg	Italy	F	62	Intrahepatic	No	N/A	N/A	N/A	T2N0M0	II	N/A	1200	No	No	No	Yes	No	No	N/A	N/A
CCA_IT_6	Fluke-Neg	Italy	F	43	Intrahepatic	No	N/A	N/A	N/A	T3N1M0	IV	N/A	1560	No	No	No	Yes	No	No	N/A	N/A
CCA_IT_7	Fluke-Neg	Italy	M	72	Intrahepatic	No	N/A	N/A	N/A	T2N1M0	IV	N/A	180	No	No	No	Yes	No	No	N/A	N/A
CCA_IT_8	Fluke-Neg	Italy	M	70	Intrahepatic	No	N/A	N/A	N/A	T1N0M0	I	N/A	1206	No	No	No	Yes	No	No	N/A	N/A
CCA_JP_1	Fluke-Neg	Japan	M	64	Intrahepatic	No	Negative	Negative	Moderate	T2aN0M0	II	N/A	1905	Yes	No	No	Yes	No	No	N/A	N/A
CCA_JP_2	Fluke-Neg	Japan	M	65	Intrahepatic	No	Negative	Negative	Moderate	T3N0M0	III	0	1604	Yes	No	No	Yes	No	No	N/A	N/A
CCA_JP_3	Fluke-Neg	Japan	M	60	Intrahepatic	No	Negative	Negative	Moderate	T2aN0M0	II	0	1756	Yes	No	No	Yes	No	No	N/A	N/A
CCA_JP_4	Fluke-Neg	Japan	M	72	Intrahepatic	No	Negative	Negative	Well	T4N0M0	IVA	0	134	Yes	No	No	Yes	No	No	N/A	N/A
CCA_JP_5	Fluke-Neg	Japan	M	62	Intrahepatic	No	Negative	Positive	Moderate	T4N1M0	IVA	1	452	Yes	No	No	Yes	No	No	N/A	N/A
CCA_JP_6	Fluke-Neg	Japan	M	65	Intrahepatic	No	Positive	Negative	Moderate	T3N0M0	III	1	574	Yes	No	No	Yes	No	No	N/A	N/A
CCA_JP_7	Fluke-Neg	Japan	M	67	Intrahepatic	No	Negative	Negative	Well	T4N0M0	IVA	1	428	Yes	No	No	Yes	No	No	N/A	N/A
CCA_JP_8	Fluke-Neg	Japan	M	66	Intrahepatic	No	Positive	Negative	Moderate	T4N0M0	IVA	1	168	Yes	No	No	Yes	No	No	N/A	N/A
CCA_JP_9	Fluke-Neg	Japan	M	60	Intrahepatic	No	Negative	Negative	N/A	T2bN0M0	II	1	90	Yes	No	No	Yes	No	No	N/A	N/A
CCA_JP_10	Fluke-Neg	Japan	M	31	Intrahepatic	Yes	Negative	Negative	Moderate	T4N1M0	IVA	1	386	Yes	No	No	Yes	No	No	N/A	N/A
CCA_JP_11	Fluke-Neg	Japan	M	N/A	Perihilar	No	Negative	Negative	Moderate	T2bN0M0	II	N/A	281	No	No	Yes	No	No	No	N/A	N/A
CCA_JP_12	Fluke-Neg	Japan	M	N/A	Perihilar	No	Negative	Negative	Well	T2bN0M0	II	N/A	228	No	No	Yes	No	No	No	N/A	N/A
CCA_JP_13	Fluke-Neg	Japan	M	N/A	Intrahepatic	No	Negative	Negative	Moderate	T3N1M0	IVA	N/A	166	No	No	Yes	No	No	No	N/A	N/A
CCA_JP_14	Fluke-Neg	Japan	M	N/A	Distal	No	Negative	Negative	Moderate	T4N0M0	IVA	N/A	784	No	No	Yes	No	No	No	N/A	N/A
CCA_JP_15	Fluke-Neg	Japan	F	N/A	Intrahepatic	No	Negative	Negative	N/A	N/A	N/A	N/A	N/A	No	No	Yes	No	No	No	N/A	N/A
CCA_JP_16	Fluke-Neg	Japan	M	N/A	Intrahepatic	No	Negative	Negative	Moderate	T4N0M0	IVA	N/A	784	No	No	Yes	No	No	No	N/A	N/A
CCA_JP_17	Fluke-Neg	Japan	M	N/A	Distal	No	Negative	Negative	Well	T3N0M0	IIA	N/A	3126	No	No	Yes	No	No	No	N/A	N/A
CCA_JP_18	Fluke-Neg	Japan	M	N/A	Intrahepatic	No	Negative	Negative	Moderate	T2aN0M0	II	N/A	2934	No	No	Yes	No	No	No	N/A	N/A
CCA_JP_19	Fluke-Neg	Japan	M	N/A	Perihilar	No	Negative	Negative	Moderate	T3N0M0	IIIA	N/A	1037	No	No	Yes	No	No	No	N/A	N/A
CCA_JP_20	Fluke-Neg	Japan	M	N/A	Intrahepatic	No	Negative	Negative	Moderate	T2aN1M0	IVA	N/A	1153	No	No	Yes	No	No	No	N/A	N/A
CCA_JP_21	Fluke-Neg	Japan	F	N/A	Perihilar	No	Negative	Negative	Moderate	T2aN1M0	IIIB	N/A	583	No	No	Yes	No	No	No	N/A	N/A
CCA_JP_22	Fluke-Neg	Japan	F	N/A	Intrahepatic	No	Negative	Negative	Moderate	T2aN1M0	IVA	N/A	532	No	No	Yes	No	No	No	N/A	N/A
CCA_JP_23	Fluke-Neg	Japan	M	N/A	Distal	No	Negative	Negative	Well	T2N1M0	IIB	N/A	2882	No	No	Yes	No	No	No	N/A	N/A
CCA_JP_24	Fluke-Neg	Japan	M	N/A	Intrahepatic	No	Negative	Negative	Moderate	T2aN0M0	II	N/A	1624	No	No	Yes	No	No	No	N/A	N/A
CCA_JP_25	Fluke-Neg	Japan	M	N/A	Intrahepatic	No	Negative	Negative	Moderate	T2bN0M0	II	N/A	181	No	No	Yes	No	No	No	N/A	N/A
CCA_JP_26	Fluke-Neg	Japan	M	N/A	Distal	No	Negative	Negative	Well	T3N1M0	IIB	N/A	489	No	No	Yes	No	No	No	N/A	N/A
CCA_JP_27	Fluke-Neg	Japan	F	N/A	Intrahepatic	No	Negative	Negative	Moderate	T4N1M0	IVA	N/A	299	No	No	Yes	No	No	No	N/A	N/A
CCA_JP_28	Fluke-Neg	Japan	F	N/A	Intrahepatic	No	Negative	Negative	Well	T3N0M0	III	N/A	2382	No	No	Yes	No	No	No	N/A	N/A
CCA_JP_29	Fluke-Neg	Japan	M	N/A	Perihilar	No	Negative	Negative	Well	T1N0M0	I	N/A	2423	No	No	Yes	No	No	No	N/A	N/A
CCA_JP_30	Fluke-Neg	Japan	M	N/A	Distal	No	Negative	Negative	Moderate	T3N0M0	IIA	N/A	2319	No	No	Yes	No	No	No	N/A	N/A
CCA_JP_31	Fluke-Neg	Japan	M	N/A	Intrahepatic	No	Negative	Negative	Moderate	T2bN0M0	II	N/A	319	No	No	Yes	No	No	No	N/A	N/A
CCA_JP_32	Fluke-Neg	Japan	M	N/A	Intrahepatic	No	Negative	Negative	Well	T1N0M0	I	N/A	2284	No	No	Yes	No	No	No	N/A	N/A
CCA_JP_33	Fluke-Neg	Japan	F	N/A	Intrahepatic	No	Negative	Negative	Moderate	T4N0M0	IVA	N/A	402	No	No	Yes	No	No	No	N/A	N/A
CCA_JP_34	Fluke-Neg	Japan	M	N/A	Intrahepatic	No	Negative	Negative	Well	T1N0M0	I	N/A	2223	No	No	Yes	No	No	No	N/A	N/A
CCA_JP_35	Fluke-Neg	Japan	M	N/A	Intrahepatic	No	Negative	Negative	Moderate	T4N1M0	IVA	N/A	1849	No	No	Yes	No	No	No	N/A	N/A
CCA_JP_36	Fluke-Neg	Japan	F	N/A	Intrahepatic	No	Negative	Negative	Moderate	T4N0M0	IVA	N/A	2204	No	No	Yes	No	No	No	N/A	N/A
CCA_JP_37	Fluke-Neg	Japan	M	N/A	Intrahepatic	No	Negative	Negative	Moderate	T2aN0M0	II	N/A	53	No	No	Yes	No	No	No	N/A	N/A
CCA_JP_38	Fluke-Neg	Japan	M	N/A	Intrahepatic	No	Positive	Negative	Moderate	T2aN0M0	II	N/A	2608	No	No	Yes	No	No	No	N/A	N/A
CCA_JP_39	Fluke-Neg	Japan	F	N/A	Intrahepatic	No	Negative	Negative	Moderate	T2bN0M0	II	N/A	882	No	No	Yes	No	No	No	N/A	N/A
CCA_JP_40	Fluke-Neg	Japan	M	N/A	Intrahepatic	No	Negative	Negative	Well	T4N1M0	IVA	N/A	749	No	No	Yes	No	No	No	N/A	N/A
CCA_JP_41	Fluke-Neg	Japan	M	N/A	Perihilar	No	Negative	Negative	Moderate	T2aN0M0	II	N/A	355	No	No	Yes	No	No	No	N/A	N/A
CCA_JP_42	Fluke-Neg	Japan	M	N/A	Distal	No	Negative	Negative	Moderate	T3N1M0	IIB	N/A	672	No	No	Yes	No	No	No	N/A	N/A
CCA_JP_43	Fluke-Neg	Japan	F	N/A	Intrahepatic	No	Negative	Negative	Well	T4N0M0	IVA	N/A	2234	No	No	Yes	No	No	No	N/A	N/A
CCA_JP_44	Fluke-Neg	Japan	M	N/A	Distal	No	Negative	Negative	Moderate	T2N0M0	IB	N/A	389	No	No	Yes	No	No	No	N/A	N/A
CCA_JP_45	Fluke-Neg	Japan	F	N/A	Intrahepatic	No	Negative	Negative	Moderate	T2aN1M0	IVA	N/A	712	No	No	Yes	No	No	No	N/A	N/A
CCA_JP_46	Fluke-Neg	Japan	M	N/A	Perihilar	No	Negative	Negative	Moderate	T3N0M0	IIIA	N/A	3337	No	No	Yes	No	No	No	N/A	N/A
CCA_JP_47	Fluke-Neg	Japan	F	N/A	Intrahepatic	No	Negative	Negative	Moderate	T2bN1M0	IVA	N/A	1791	No	No	Yes	No	No	No	N/A	N/A
CCA_JP_48	Fluke-Neg	Japan	M	N/A	Intrahepatic	No	Negative	Positive	Moderate	T4N1M0	IVA	N/A	654	No	No	Yes	No	No	No	N/A	N/A
CCA_JP_49	Fluke-Neg	Japan	M	N/A	Intrahepatic	No	Negative	Positive	Moderate	T4N1M0	IVA	N/A	3081	No	No	Yes	No	No	No	N/A	N/A
CCA_JP_50	Fluke-Neg	Japan	M	N/A	Perihilar	No	Negative	Negative	Well	T1N0M0	I	N/A	2288	No	No	Yes	No	No	No	N/A	N/A
CCA_JP_51	Fluke-Neg	Japan	M	N/A	Distal	No	Negative	Negative	Moderate	T3N0M0	IIA	N/A	501	No	No	Yes	No	No	No	N/A	N/A
CCA_JP_52	Fluke-Neg	Japan	F	N/A	Intrahepatic	No	Negative	Positive	Moderate	T4N0M0	IVA	N/A	1977	No	No	Yes	No	No	No	N/A	N/A
CCA_JP_53	Fluke-Neg	Japan	M	N/A	Intrahepatic	No	Negative	Negative	Moderate	T3N0M0	III	N/A	1094	No	No	Yes	No	No	No	N/A	N/A
CCA_JP_54	Fluke-Neg	Japan	M	N/A	Intrahepatic	No	Negative	Negative	Well	T1N0M0	I	N/A	2914	No	No	Yes	No	No	No	N/A	N/A
CCA_JP_55	Fluke-Neg	Japan	M	N/A	Distal	No	Negative	Negative	Well	T2N0M0	IB	N/A	2920	No	No	Yes	No	No	No	N/A	N/A
CCA_JP_56	Fluke-Neg	Japan	F	N/A	Perihilar	No	Negative	Negative	Moderate	T2bN0M0	II	N/A	2879	No	No	Yes	No	No	No	N/A	N/A
CCA_JP_57	Fluke-Neg	Japan	M	N/A	Intrahepatic	No	Positive	Negative	Moderate	T1N0M0	I	N/A	1676	No	No	Yes	No	No	No	N/A	N/A
CCA_JP_58	Fluke-Neg	Japan	M	N/A	Perihilar	No	Negative	Negative	Moderate	T2bN1M0	IIIB	N/A	1724	No	No	Yes	No	No	No	N/A	N/A
CCA_JP_59	Fluke-Neg	Japan	M	N/A	Perihilar	No	Negative	Negative	Well	T2bN0M0	II	N/A	2776	No	No	Yes	No	No	No	N/A	N/A
CCA_JP_60	Fluke-Neg	Japan	M	N/A	Perihilar	No	Negative	Negative	Moderate	T2bN0M0	II	N/A	1334	No	No	Yes	No	No	No	N/A	N/A
CCA_JP_61	Fluke-Neg	Japan	F	N/A	Intrahepatic	No	Negative	Negative	Well	T2bN1M0	IVA	N/A	646	No	No	Yes	No	No	No	N/A	N/A
CCA_JP_62	Fluke-Neg	Japan	M	N/A	Distal	No	Negative	Negative	Well	T1N0M0	IA	N/A	2725	No	No	Yes	No	No	No	N/A	N/A
CCA_JP_63	Fluke-Neg	Japan	M	N/A	Intrahepatic	No	Negative	Negative	Well	T4N1M0	IVA	N/A	1380	No	No	Yes	No	No	No	N/A	N/A
CCA_JP_64	Fluke-Neg	Japan	M	N/A	Intrahepatic	No	Negative	Negative	Moderate	T4N0M0	IVA	N/A	2756	No	No	Yes	No	No	No	N/A	N/A
CCA_JP_65	Fluke-Neg	Japan	M	N/A	Intrahepatic	No	Negative	Negative	Moderate	T4N1M0	IVA	N/A	412	No	No	Yes	No	No	No	N/A	N/A
CCA_JP_66	Fluke-Neg	Japan	M	N/A	Distal	No	Negative	Negative	Well	T3N1M0	IIB	N/A	2929	No	No	Yes	No	No	No	N/A	N/A
CCA_JP_67	Fluke-Neg	Japan	M	N/A	Perihilar	No	Negative	Negative	Moderate	T2N1M0	IIB	N/A	329	No	No	Yes	No	No	No	N/A	N/A
CCA_JP_68	Fluke-Neg	Japan	M	N/A	Distal	No	Negative	Negative	Moderate	T3N0M0	IIA	N/A	2985	No	No	Yes	No	No	No	N/A	N/A
CCA_JP_69	Fluke-Neg	Japan	M	N/A	Perihilar	No	Negative	Negative	Moderate	T2aN1M0	IIIB	N/A	477	No	No	Yes	No	No	No	N/A	N/A
CCA_JP_70	Fluke-Neg	Japan	M	N/A	Perihilar	No	Negative	Negative	Moderate	T2N1M0	IIB	N/A	765	No	No	Yes	No	No	No	N/A	N/A
CCA_JP_71	Fluke-Neg	Japan	F	N/A	Perihilar	No	Negative	Negative	Well	T2bN1M0	IIIB	N/A	406	No	No	Yes	No	No	No	N/A	N/A
CCA_JP_72	Fluke-Neg	Japan	M	N/A	Distal	No	Negative	Negative	Moderate	T3N0M0	IIA	N/A	902	No	No	Yes	No	No	No	N/A	N/A
CCA_JP_73	Fluke-Neg	Japan	M	N/A	Intrahepatic	No	Negative	Negative	Moderate	T3N0M0	III	N/A	163	No	No	Yes	No	No	No	N/A	N/A
CCA_JP_74	Fluke-Neg	Japan	M	N/A	Perihilar	No	Negative	Negative	Moderate	T3N0M0	IIIA	N/A	2143	No	No	Yes	No	No	No	N/A	N/A
CCA_JP_75	Fluke-Neg	Japan	F	N/A	Perihilar	No	Negative	Negative	Well	T2bN0M0	II	N/A	2463	No	No	Yes	No	No	No	N/A	N/A
CCA_JP_76	Fluke-Neg	Japan	F	N/A	Intrahepatic	No	Negative	Negative	Moderate	T2aN0M0	II	N/A	2788	No	No	Yes	No	No	No	N/A	N/A
CCA_JP_77	Fluke-Neg	Japan	M	N/A	Intrahepatic	No	Negative	Negative	Moderate	T4N1M0	IVA	N/A	486	No	No	Yes	No	No	No	N/A	N/A
CCA_JP_78	Fluke-Neg	Japan	M	N/A	Distal	No	Negative	Negative	Well	T1N0M0	IA	N/A	1853	No	No	Yes	No	No	No	N/A	N/A
CCA_JP_79	Fluke-Neg	Japan	F	N/A	Intrahepatic	No	Negative	Negative	Moderate	T4N1M0	IVA	N/A	474	No	No	Yes	No	No	No	N/A	N/A
CCA_JP_80	Fluke-Neg	Japan	M	N/A	Distal	No	Negative	Negative	Moderate	T3N1M0	IIB	N/A	2304	No	No	Yes	No	No	No	N/A	N/A
CCA_JP_81	Fluke-Neg	Japan	M	N/A	Intrahepatic	No	Negative	Negative	Moderate	T4N0M0	IVA	N/A	1627	No	No	Yes	No	No	No	N/A	N/A
CCA_JP_82	Fluke-Neg	Japan	M	N/A	Intrahepatic	No	Negative	Negative	Well	T2aN0M0	II	N/A	1825	No	No	Yes	No	No	No	N/A	N/A
CCA_JP_83	Fluke-Neg	Japan	M	N/A	Perihilar	No	Negative	Negative	Well	T2bN1M0	IIIB	N/A	500	No	No	Yes	No	No	No	N/A	N/A
CCA_JP_84	Fluke-Neg	Japan	F	N/A	Perihilar	No	Negative	Negative	Moderate	T3N1M0	IIB	N/A	844	No	No	Yes	No	No	No	N/A	N/A
CCA_JP_85	Fluke-Neg	Japan	F	N/A	Intrahepatic	No	Negative	Negative	Moderate	T4N0M0	IVA	N/A	156	No	No	Yes	No	No	No	N/A	N/A
CCA_JP_86	Fluke-Neg	Japan	M	N/A	Intrahepatic	No	Negative	Negative	Moderate	T2aN0M0	II	N/A	1722	No	No	Yes	No	No	No	N/A	N/A
CCA_JP_87	Fluke-Neg	Japan	F	N/A	Intrahepatic	No	Negative	Negative	Moderate	T4N1M0	IVA	N/A	181	No	No	Yes	No	No	No	N/A	N/A
CCA_JP_88	Fluke-Neg	Japan	F	N/A	Intrahepatic	No	Negative	Negative	Moderate	T4N1M0	IVA	N/A	1352	No	No	Yes	No	No	No	N/A	N/A
CCA_JP_89	Fluke-Neg	Japan	M	N/A	Intrahepatic	No	Negative	Negative	Moderate	T2bN0M0	II	N/A	1835	No	No	Yes	No	No	No	N/A	N/A
CCA_JP_90	Fluke-Neg	Japan	M	N/A	Distal	No	Negative	Negative	Moderate	T3N0M0	IIA	N/A	755	No	No	Yes	No	No	No	N/A	N/A
CCA_JP_91	Fluke-Neg	Japan	M	N/A	Intrahepatic	No	Negative	Negative	Moderate	T3N1M0	IVA	N/A	174	No	No	Yes	No	No	No	N/A	N/A
CCA_JP_92	Fluke-Neg	Japan	F	N/A	Intrahepatic	No	Negative	Negative	Moderate	T2aN0M0	II	N/A	762	No	No	Yes	No	No	No	N/A	N/A
CCA_JP_93	Fluke-Neg	Japan	F	N/A	Intrahepatic	No	Negative	Negative	Moderate	T4N0M0	IVA	N/A	175	No	No	Yes	No	No	No	N/A	N/A
CCA_JP_94	Fluke-Neg	Japan	F	N/A	Distal	No	Negative	Negative	Moderate	T3N0M0	IIA	N/A	393	No	No	Yes	No	No	No	N/A	N/A
CCA_JP_95	Fluke-Neg	Japan	M	N/A	Perihilar	No	Negative	Negative	Poor	T2aN0M0	II	N/A	90	No	No	Yes	No	No	No	N/A	N/A
CCA_JP_96	Fluke-Neg	Japan	M	N/A	Intrahepatic	No	Negative	Negative	Moderate	T2aN0M0	II	N/A	2172	No	No	Yes	No	No	No	N/A	N/A
CCA_JP_97	Fluke-Neg	Japan	M	N/A	Perihilar	No	Negative	Negative	Moderate	T4N1M0	IVA	N/A	225	No	No	Yes	No	No	No	N/A	N/A
CCA_JP_98	Fluke-Neg	Japan	M	N/A	Perihilar	No	Negative	Negative	Moderate	T2bN0M0	II	N/A	1684	No	No	Yes	No	No	No	N/A	N/A
CCA_JP_99	Fluke-Neg	Japan	M	N/A	Intrahepatic	No	Negative	Negative	Moderate	T3N0M0	III	N/A	2134	No	No	Yes	No	No	No	N/A	N/A
CCA_JP_100	Fluke-Neg	Japan	M	N/A	Perihilar	No	Negative	Negative	Moderate	T2bN0M0	II	N/A	899	No	No	Yes	No	No	No	N/A	N/A
CCA_JP_101	Fluke-Neg	Japan	F	N/A	Distal	No	Negative	Negative	Moderate	T3N1M0	IIB	N/A	2067	No	No	Yes	No	No	No	N/A	N/A
CCA_JP_102	Fluke-Neg	Japan	M	N/A	Perihilar	No	Negative	Negative	Moderate	T3N1M0	IIB	N/A	874	No	No	Yes	No	No	No	N/A	N/A
CCA_JP_103	Fluke-Neg	Japan	M	N/A	Intrahepatic	No	Negative	Negative	Moderate	T3N0M0	III	N/A	1829	No	No	Yes	No	No	No	N/A	N/A
CCA_JP_104	Fluke-Neg	Japan	M	N/A	Intrahepatic	No	Negative	Positive	Well	T2aN0M0	II	N/A	1142	No	No	Yes	No	No	No	N/A	N/A
CCA_JP_105	Fluke-Neg	Japan	M	N/A	Intrahepatic	No	Negative	Negative	Moderate	T2aN0M0	II	N/A	1856	No	No	Yes	No	No	No	N/A	N/A
CCA_JP_106	Fluke-Neg	Japan	F	N/A	Intrahepatic	No	Negative	Negative	Moderate	T2aN0M0	II	N/A	1981	No	No	Yes	No	No	No	N/A	N/A
CCA_JP_107	Fluke-Neg	Japan	M	N/A	Perihilar	No	Negative	Negative	Moderate	T3N1M0	IIIB	N/A	609	No	No	Yes	No	No	No	N/A	N/A
CCA_JP_108	Fluke-Neg	Japan	F	N/A	Perihilar	No	Negative	Negative	Well	T2bN0M0	II	N/A	1983	No	No	Yes	No	No	No	N/A	N/A
CCA_JP_109	Fluke-Neg	Japan	M	N/A	Distal	No	Negative	Negative	Well	T2N0M0	IB	N/A	899	No	No	Yes	No	No	No	N/A	N/A
CCA_JP_110	Fluke-Neg	Japan	M	N/A	Intrahepatic	No	Negative	Negative	Moderate	T2aN0M0	II	N/A	380	No	No	Yes	No	No	No	N/A	N/A
CCA_JP_111	Fluke-Neg	Japan	M	N/A	Perihilar	No	Negative	Negative	Moderate	T4N1M0	IVA	N/A	702	No	No	Yes	No	No	No	N/A	N/A
CCA_JP_112	Fluke-Neg	Japan	M	N/A	Intrahepatic	No	Negative	Negative	Moderate	T3N0M0	III	N/A	681	No	No	Yes	No	No	No	N/A	N/A
CCA_JP_113	Fluke-Neg	Japan	F	N/A	Perihilar	No	Negative	Negative	Well	T1N0M0	I	N/A	1254	No	No	Yes	No	No	No	N/A	N/A
CCA_JP_114	Fluke-Neg	Japan	M	N/A	Perihilar	No	Negative	Negative	Moderate	T2bN1M0	IIIB	N/A	110	No	No	Yes	No	No	No	N/A	N/A
CCA_JP_115	Fluke-Neg	Japan	M	N/A	Intrahepatic	No	Negative	Negative	Moderate	T4N0M0	IVA	N/A	181	No	No	Yes	No	No	No	N/A	N/A
CCA_JP_116	Fluke-Neg	Japan	F	N/A	Perihilar	No	Negative	Negative	Well	T3N1M0	IIIB	N/A	1653	No	No	Yes	No	No	No	N/A	N/A
CCA_JP_117	Fluke-Neg	Japan	M	N/A	Intrahepatic	No	Negative	Negative	Moderate	T4N1M0	IVA	N/A	894	No	No	Yes	No	No	No	N/A	N/A
CCA_JP_118	Fluke-Neg	Japan	M	N/A	Intrahepatic	No	Negative	Negative	Moderate	T2aN0M0	II	N/A	851	No	No	Yes	No	No	No	N/A	N/A
CCA_JP_119	Fluke-Neg	Japan	M	N/A	Distal	No	Negative	Negative	Poor	T4N1M0	III	N/A	278	No	No	Yes	No	No	No	N/A	N/A
CCA_JP_120	Fluke-Neg	Japan	M	N/A	Intrahepatic	No	Negative	Negative	Moderate	T4N0M0	IVA	N/A	307	No	No	Yes	No	No	No	N/A	N/A
CCA_JP_121	Fluke-Neg	Japan	F	N/A	Intrahepatic	No	Negative	Negative	Moderate	T2aN0M0	II	N/A	1335	No	No	Yes	No	No	No	N/A	N/A
CCA_JP_122	Fluke-Neg	Japan	M	N/A	Distal	No	Negative	Negative	Well	T1N0M0	IA	N/A	887	No	No	Yes	No	No	No	N/A	N/A
CCA_JP_123	Fluke-Neg	Japan	M	N/A	Perihilar	No	Negative	Negative	Well	T1N0M0	IA	N/A	1348	No	No	Yes	No	No	No	N/A	N/A
CCA_JP_124	Fluke-Neg	Japan	M	N/A	Intrahepatic	No	Negative	Negative	Poor	T2aN0M0	II	N/A	1266	No	No	Yes	No	No	No	N/A	N/A
CCA_JP_125	Fluke-Neg	Japan	M	N/A	Intrahepatic	No	Negative	Negative	Poor	T4N1M0	IVA	N/A	1017	No	No	Yes	No	No	No	N/A	N/A
CCA_JP_126	Fluke-Neg	Japan	M	N/A	Intrahepatic	No	Negative	Negative	Well	T1N0M0	I	N/A	1160	No	No	Yes	No	No	No	N/A	N/A
CCA_JP_127	Fluke-Neg	Japan	M	N/A	Intrahepatic	No	Negative	Negative	Moderate	T4N1M0	IVA	N/A	643	No	No	Yes	No	No	No	N/A	N/A
CCA_JP_128	Fluke-Neg	Japan	M	N/A	Distal	No	Negative	Negative	N/A	T2N0M0	IA	N/A	1436	No	No	Yes	No	No	No	N/A	N/A
CCA_JP_129	Fluke-Neg	Japan	M	N/A	Intrahepatic	No	Negative	Negative	Moderate	T4N1M0	IVA	N/A	394	No	No	Yes	No	No	No	N/A	N/A
CCA_JP_130	Fluke-Neg	Japan	F	N/A	Intrahepatic	No	Positive	Negative	Moderate	T4N1M0	IVA	N/A	445	No	No	Yes	No	No	No	N/A	N/A
CCA_JP_131	Fluke-Neg	Japan	F	N/A	Intrahepatic	No	Negative	Negative	Moderate	T2aN1M0	IVA	N/A	1135	No	No	Yes	No	No	No	N/A	N/A
CCA_JP_132	Fluke-Neg	Japan	M	N/A	Intrahepatic	No	Negative	Negative	Moderate	T2aN0M0	II	N/A	1911	No	No	Yes	No	No	No	N/A	N/A
CCA_JP_133	Fluke-Neg	Japan	M	N/A	Perihilar	No	Negative	Negative	Moderate	T2bN1M0	IIIB	N/A	1314	No	No	Yes	No	No	No	N/A	N/A
CCA_JP_134	Fluke-Neg	Japan	M	N/A	Intrahepatic	No	Negative	Negative	Well	T1N0M0	I	N/A	1150	No	No	Yes	No	No	No	N/A	N/A
CCA_JP_135	Fluke-Neg	Japan	M	N/A	Intrahepatic	No	Negative	Positive	Moderate	T2bN1M0	IVA	N/A	4	No	No	Yes	No	No	No	N/A	N/A
CCA_JP_136	Fluke-Neg	Japan	M	N/A	Intrahepatic	No	Negative	Negative	N/A	T2aN1M0	IVA	N/A	264	No	No	Yes	No	No	No	N/A	N/A
CCA_JP_137	Fluke-Neg	Japan	M	N/A	Intrahepatic	No	Negative	Positive	Well	T1N0M0	I	N/A	1068	No	No	Yes	No	No	No	N/A	N/A
CCA_JP_138	Fluke-Neg	Japan	F	N/A	Intrahepatic	No	Negative	Negative	Moderate	T4N0M0	IV	N/A	162	No	No	Yes	No	No	No	N/A	N/A
CCA_JP_139	Fluke-Neg	Japan	M	N/A	Distal	No	Negative	Negative	Well	T2N1M0	IIB	N/A	637	No	No	Yes	No	No	No	N/A	N/A
CCA_JP_140	Fluke-Neg	Japan	F	N/A	Intrahepatic	No	Negative	Positive	Moderate	T2aN0M0	II	N/A	957	No	No	Yes	No	No	No	N/A	N/A
CCA_JP_141	Fluke-Neg	Japan	M	N/A	Intrahepatic	No	Negative	Negative	Moderate	T4N0M0	IVA	N/A	670	No	No	Yes	No	No	No	N/A	N/A
CCA_JP_142	Fluke-Neg	Japan	M	N/A	Intrahepatic	No	Negative	Negative	Poor	T2aN0M0	II	N/A	83	No	No	Yes	No	No	No	N/A	N/A
CCA_JP_143	Fluke-Neg	Japan	M	N/A	Intrahepatic	No	Negative	Negative	Moderate	T4N0M0	IVA	N/A	264	No	No	Yes	No	No	No	N/A	N/A
CCA_JP_144	Fluke-Neg	Japan	M	N/A	Intrahepatic	No	Negative	Negative	Moderate	T4N1M0	IVA	N/A	403	No	No	Yes	No	No	No	N/A	N/A
CCA_JP_145	Fluke-Neg	Japan	F	N/A	Intrahepatic	No	Positive	Negative	Moderate	T3N0M0	III	N/A	582	No	No	Yes	No	No	No	N/A	N/A
CCA_JP_146	Fluke-Neg	Japan	F	N/A	Intrahepatic	No	Negative	Negative	Moderate	T2aN1M0	IVA	N/A	419	No	No	Yes	No	No	No	N/A	N/A
CCA_JP_147	Fluke-Neg	Japan	M	N/A	Intrahepatic	No	Negative	Negative	Moderate	T3N0M0	III	N/A	767	No	No	Yes	No	No	No	N/A	N/A
CCA_JP_148	Fluke-Neg	Japan	F	N/A	Intrahepatic	No	Negative	Negative	Well	T3N0M0	III	N/A	624	No	No	Yes	No	No	No	N/A	N/A
CCA_JP_149	Fluke-Neg	Japan	M	N/A	Intrahepatic	No	Negative	Positive	Moderate	T4N1M0	IVA	N/A	135	No	No	Yes	No	No	No	N/A	N/A
CCA_JP_150	Fluke-Neg	Japan	F	N/A	Perihilar	No	Negative	Negative	Well	T3N1M0	IIB	N/A	210	No	No	Yes	No	No	No	N/A	N/A
CCA_JP_151	Fluke-Neg	Japan	M	N/A	Intrahepatic	No	Negative	Negative	Well	T2aN0M0	II	N/A	428	No	No	Yes	No	No	No	N/A	N/A
CCA_JP_152	Fluke-Neg	Japan	F	N/A	Intrahepatic	No	Negative	Negative	Poor	T3N0M0	III	N/A	472	No	No	Yes	No	No	No	N/A	N/A
CCA_JP_153	Fluke-Neg	Japan	M	N/A	Distal	No	Negative	Negative	Poor	T3N0M0	IIA	N/A	477	No	No	Yes	No	No	No	N/A	N/A
CCA_JP_154	Fluke-Neg	Japan	M	N/A	Intrahepatic	No	Negative	Negative	Moderate	T3N0M0	III	N/A	503	No	No	Yes	No	No	No	N/A	N/A
CCA_JP_155	Fluke-Neg	Japan	M	N/A	Distal	No	Negative	Negative	Poor	T3N1M0	IIB	N/A	34	No	No	Yes	No	No	No	N/A	N/A
CCA_JP_156	Fluke-Neg	Japan	M	N/A	Distal	No	Negative	Negative	Moderate	T3N0M0	IIA	N/A	388	No	No	Yes	No	No	No	N/A	N/A
CCA_JP_157	Fluke-Neg	Japan	M	N/A	Perihilar	No	Negative	Negative	Well	T1N0M0	I	N/A	314	No	No	Yes	No	No	No	N/A	N/A
CCA_JP_158	Fluke-Neg	Japan	M	N/A	Perihilar	No	Negative	Negative	Well	T4N1M0	IVA	N/A	267	No	No	Yes	No	No	No	N/A	N/A
CCA_JP_159	Fluke-Neg	Japan	M	N/A	Perihilar	No	Negative	Negative	Moderate	T2aN1M0	IIIB	N/A	379	No	No	Yes	No	No	No	N/A	N/A
CCA_JP_160	Fluke-Neg	Japan	M	N/A	Intrahepatic	No	Negative	Negative	Moderate	T2aN0M0	II	N/A	358	No	No	Yes	No	No	No	N/A	N/A
CCA_JP_161	Fluke-Neg	Japan	M	N/A	Perihilar	No	Negative	Negative	Well	T1N0M0	I	N/A	328	No	No	Yes	No	No	No	N/A	N/A
CCA_JP_162	Fluke-Neg	Japan	M	N/A	Intrahepatic	No	Negative	Negative	Moderate	T2aN0M0	II	N/A	220	No	No	Yes	No	No	No	N/A	N/A
CCA_JP_163	Fluke-Neg	Japan	M	N/A	Intrahepatic	No	Negative	Negative	Well	T3N0M0	III	N/A	146	No	No	Yes	No	No	No	N/A	N/A
CCA_JP_164	Fluke-Neg	Japan	F	N/A	Intrahepatic	No	Negative	Negative	Well	T4N0M0	IVA	N/A	501	No	No	Yes	No	No	No	N/A	N/A
CCA_JP_165	Fluke-Neg	Japan	F	N/A	Intrahepatic	No	Negative	Negative	Moderate	T4N1M0	IVA	N/A	223	No	No	Yes	No	No	No	N/A	N/A
CCA_JP_166	Fluke-Neg	Japan	F	N/A	Intrahepatic	No	Negative	Negative	Moderate	T2aN0M0	II	N/A	2259	No	No	Yes	No	No	No	N/A	N/A
CCA_JP_167	Fluke-Neg	Japan	F	N/A	Intrahepatic	No	Negative	Negative	Moderate	T2aN0M0	II	N/A	1424	No	No	Yes	No	No	No	N/A	N/A
CCA_JP_168	Fluke-Neg	Japan	M	N/A	Intrahepatic	No	Negative	Negative	Moderate	T2aN0M0	II	N/A	131	No	No	Yes	No	No	No	N/A	N/A
CCA_JP_169	Fluke-Neg	Japan	F	N/A	Perihilar	No	Negative	Negative	Moderate	T2bN1M0	IIIB	N/A	106	No	No	Yes	No	No	No	N/A	N/A
CCA_JP_170	Fluke-Neg	Japan	M	N/A	Distal	No	Negative	Negative	Moderate	T3N0M0	IIA	N/A	83	No	No	Yes	No	No	No	N/A	N/A
CCA_JP_171	Fluke-Neg	Japan	M	N/A	Distal	No	Negative	Negative	Well	T3N0M0	IIA	N/A	68	No	No	Yes	No	No	No	N/A	N/A
CCA_JP_172	Fluke-Neg	Japan	M	N/A	Perihilar	No	Negative	Negative	N/A	N/A	N/A	N/A	N/A	No	No	Yes	No	No	No	N/A	N/A
CCA_JP_173	Fluke-Neg	Japan	M	N/A	Perihilar	No	Negative	Negative	N/A	N/A	N/A	N/A	N/A	No	No	Yes	No	No	No	N/A	N/A
CCA_JP_174	Fluke-Neg	Japan	F	N/A	Intrahepatic	No	Negative	Negative	N/A	N/A	N/A	N/A	N/A	No	No	Yes	No	No	No	N/A	N/A
CCA_JP_175	Fluke-Neg	Japan	M	N/A	Intrahepatic	No	Negative	Negative	Poor	T2bN0M0	II	N/A	341	No	No	Yes	No	No	No	N/A	N/A
CCA_JP_176	Fluke-Neg	Japan	F	N/A	Intrahepatic	No	Negative	Negative	Moderate	T3N0M0	III	N/A	694	No	No	Yes	No	No	No	N/A	N/A
CCA_JP_177	Fluke-Neg	Japan	M	N/A	Intrahepatic	No	Negative	Negative	Moderate	T2aN0M0	II	N/A	208	No	No	Yes	No	No	No	N/A	N/A
CCA_JP_178	Fluke-Neg	Japan	M	N/A	Intrahepatic	No	Negative	Negative	Moderate	T4N1M0	IVA	N/A	125	No	No	Yes	No	No	No	N/A	N/A
CCA_JP_179	Fluke-Neg	Japan	F	N/A	Intrahepatic	N/A	Negative	Negative	Well	T4N0M0	IVA	N/A	1665	No	No	Yes	No	No	No	N/A	N/A
CCA_JP_180	Fluke-Neg	Japan	F	N/A	Intrahepatic	N/A	Negative	Negative	Moderate	T4N1M0	IVA	N/A	1820	No	No	Yes	No	No	No	N/A	N/A
CCA_JP_181	Fluke-Neg	Japan	M	N/A	Intrahepatic	No	Negative	Negative	Moderate	T4N1M0	IVA	N/A	932	No	No	Yes	No	No	No	N/A	N/A
CCA_JP_182	Fluke-Neg	Japan	M	N/A	Intrahepatic	No	Negative	Negative	Moderate	T2bN0M0	II	N/A	601	No	No	Yes	No	No	No	N/A	N/A
CCA_JP_183	Fluke-Neg	Japan	F	N/A	Intrahepatic	No	Positive	Negative	Moderate	T2aN0M0	II	N/A	1281	No	No	Yes	No	No	No	N/A	N/A
CCA_JP_184	Fluke-Neg	Japan	M	N/A	Intrahepatic	No	Negative	Positive	Moderate	T2aN0M0	II	N/A	458	No	No	Yes	No	No	No	N/A	N/A
CCA_JP_185	Fluke-Neg	Japan	F	N/A	Intrahepatic	No	Negative	Negative	Well	T4N0M0	IVA	N/A	1013	No	No	Yes	No	No	No	N/A	N/A
CCA_JP_186	Fluke-Neg	Japan	F	N/A	Intrahepatic	No	Negative	Negative	Moderate	T2aN1M0	IVA	N/A	946	No	No	Yes	No	No	No	N/A	N/A
CCA_JP_187	Fluke-Neg	Japan	F	N/A	Intrahepatic	No	Negative	Negative	Well	T3N1M0	IVA	N/A	722	No	No	Yes	No	No	No	N/A	N/A
CCA_JP_188	Fluke-Neg	Japan	F	N/A	Intrahepatic	No	Negative	Negative	Moderate	T2aN0M0	II	N/A	818	No	No	Yes	No	No	No	N/A	N/A
CCA_JP_189	Fluke-Neg	Japan	M	N/A	Intrahepatic	No	Negative	Negative	Moderate	T2aN1M0	IVA	N/A	137	No	No	Yes	No	No	No	N/A	N/A
CCA_JP_190	Fluke-Neg	Japan	M	N/A	Intrahepatic	No	Negative	Negative	Moderate	T1N0M0	I	N/A	790	No	No	Yes	No	No	No	N/A	N/A
CCA_JP_191	Fluke-Neg	Japan	F	N/A	Intrahepatic	No	Negative	Negative	Poor	T2aN0M0	II	N/A	277	No	No	Yes	No	No	No	N/A	N/A
CCA_JP_192	Fluke-Neg	Japan	M	N/A	Intrahepatic	No	Negative	Negative	Moderate	T2bN0M0	II	N/A	793	No	No	Yes	No	No	No	N/A	N/A
CCA_JP_193	Fluke-Neg	Japan	F	N/A	Intrahepatic	No	Negative	Negative	Moderate	T4N1M0	IVA	N/A	144	No	No	Yes	No	No	No	N/A	N/A
CCA_JP_194	Fluke-Neg	Japan	F	N/A	Intrahepatic	No	Negative	Negative	Well	T2aN1M0	IVA	N/A	486	No	No	Yes	No	No	No	N/A	N/A
CCA_JP_195	Fluke-Neg	Japan	M	N/A	Intrahepatic	No	Negative	Negative	Poor	T2aN1M0	IVA	N/A	648	No	No	Yes	No	No	No	N/A	N/A
CCA_JP_196	Fluke-Neg	Japan	M	N/A	Intrahepatic	No	Negative	Negative	Well	T2bN1M0	IVA	N/A	1428	No	No	Yes	No	No	No	N/A	N/A
CCA_JP_197	Fluke-Neg	Japan	F	N/A	Intrahepatic	No	Negative	Negative	Moderate	T2aN1M0	IVA	N/A	196	No	No	Yes	No	No	No	N/A	N/A
CCA_JP_198	Fluke-Neg	Japan	M	N/A	Intrahepatic	No	Negative	Negative	Moderate	T2aN1M0	IVA	N/A	218	No	No	Yes	No	No	No	N/A	N/A
CCA_JP_199	Fluke-Neg	Japan	M	N/A	Distal	No	Negative	Negative	Moderate	T2N1M0	IIB	N/A	438	No	No	Yes	No	No	No	N/A	N/A
CCA_JP_200	Fluke-Neg	Japan	F	N/A	Perihilar	No	Negative	Positive	Well	T2bN0M0	II	N/A	2400	No	No	Yes	No	No	No	N/A	N/A
CCA_JP_201	Fluke-Neg	Japan	F	N/A	Intrahepatic	No	Negative	Negative	Moderate	T2aN0M0	II	N/A	3610	No	No	Yes	No	No	No	N/A	N/A
CCA_JP_202	Fluke-Neg	Japan	M	N/A	Intrahepatic	No	Negative	Negative	Moderate	T2bN0M0	II	N/A	864	No	No	Yes	No	No	No	N/A	N/A
CCA_JP_203	Fluke-Neg	Japan	M	N/A	Intrahepatic	No	Negative	Negative	Moderate	T3N1M0	IVA	N/A	1128	No	No	Yes	No	No	No	N/A	N/A
CCA_JP_204	Fluke-Neg	Japan	F	N/A	Distal	No	Negative	Negative	Well	T2N0M0	IB	N/A	1758	No	No	Yes	No	No	No	N/A	N/A
CCA_JP_205	Fluke-Neg	Japan	F	N/A	Perihilar	No	Negative	Negative	Well	T1N0M0	I	N/A	2118	No	No	Yes	No	No	No	N/A	N/A
CCA_JP_206	Fluke-Neg	Japan	F	N/A	Intrahepatic	No	Negative	Negative	Well	T2aN0M0	II	N/A	2127	No	No	Yes	No	No	No	N/A	N/A
CCA_JP_207	Fluke-Neg	Japan	M	N/A	Intrahepatic	No	Negative	Negative	Moderate	T3N1M0	IVA	N/A	334	No	No	Yes	No	No	No	N/A	N/A
CCA_JP_208	Fluke-Neg	Japan	F	N/A	Intrahepatic	No	Negative	Negative	Moderate	T2aN0M0	II	N/A	976	No	No	Yes	No	No	No	N/A	N/A
CCA_JP_209	Fluke-Neg	Japan	M	N/A	Intrahepatic	No	Negative	Negative	Poor	T2bN1M0	IVA	N/A	643	No	No	Yes	No	No	No	N/A	N/A
CCA_JP_210	Fluke-Neg	Japan	F	N/A	Intrahepatic	No	Negative	Negative	N/A	N/A	N/A	N/A	51	No	No	Yes	No	No	No	N/A	N/A
CCA_KR_1	Fluke-Neg	Korea	M	63	Intrahepatic	No	Negative	Negative	Poor	T2aN0	N/A	0	1042	No	Yes	No	Yes	No	Yes	N/A	4
CCA_KR_2	Fluke-Neg	Korea	M	70	Intrahepatic	No	Negative	Negative	Moderate	T2bN0	N/A	1	777	No	Yes	No	Yes	Yes	Yes	4	4
CCA_RO_1	Fluke-Neg	Romania	M	45	Intrahepatic	No	N/A	N/A	Poor	T3N1Mx	N/A	1	212	Yes	No	No	Yes	No	No	N/A	N/A
CCA_RO_2	Fluke-Neg	Romania	F	49	Perihilar	No	Negative	Negative	N/A	T2N0M1	IV	1	603	Yes	No	No	Yes	Yes	Yes	1	1
CCA_RO_3	Fluke-Neg	Romania	M	46	Perihilar	No	Negative	Negative	Moderate-Poor	T3N1M0	IIB	1	93	Yes	No	No	Yes	Yes	Yes	2	2
CCA_RO_4	Fluke-Neg	Romania	F	53	Intrahepatic	No	N/A	N/A	N/A	N/A	N/A	1	N/A	Yes	No	No	Yes	Yes	Yes	2	2
CCA_RO_5	Fluke-Neg	Romania	F	69	Intrahepatic	No	Negative	Negative	Well	N/A	N/A	1	9	Yes	No	No	Yes	Yes	Yes	4	4
CCA_RO_6	Fluke-Neg	Romania	M	N/A	Intrahepatic	No	N/A	N/A	N/A	N/A	N/A	1	N/A	Yes	No	No	Yes	Yes	Yes	4	4
CCA_RO_7	Fluke-Neg	Romania	M	68	Distal	No	Negative	Negative	Well	T1N1M0	IA	1	2304	Yes	No	No	Yes	Yes	Yes	2	2
CCA_RO_8	Fluke-Neg	Romania	M	47	Perihilar	No	Negative	Negative	Well	T2N0M0	II	1	325	No	Yes	No	No	No	Yes	N/A	N/A
CCA_RO_9	Fluke-Neg	Romania	M	49	Distal	No	Negative	Negative	Well	T2N0M0	IB	1	1307	No	Yes	No	No	No	No	N/A	N/A
CCA_RO_10	Fluke-Neg	Romania	F	61.4822	Intrahepatic	No	Negative	Negative	poor	T3N0M0	III	0	848	No	Yes	No	Yes	Yes	Yes	4	4
CCA_RO_11	Fluke-Neg	Romania	F	45	Intrahepatic	No	Negative	Negative	Well	T4N0M1	IVB	1	6	No	Yes	No	No	No	No	N/A	N/A
CCA_RO_12	Fluke-Neg	Romania	F	63	Perihilar	No	Negative	Negative	Well	T3N1M1	IVB	1	15	No	Yes	No	No	No	No	N/A	N/A
CCA_RO_13	Fluke-Neg	Romania	M	68	Distal	No	Negative	Negative	Well	T1N0M0	IA	1	670	No	Yes	No	No	No	No	N/A	N/A
CCA_RO_14	Fluke-Neg	Romania	M	70	Distal	No	Negative	Negative	Well	T3N1M0	IIB	1	422	No	Yes	No	No	No	No	N/A	N/A
CCA_RO_15	Fluke-Neg	Romania	F	61	Perihilar	No	Negative	Negative	Well-Moderate	T3N0M0	IIIA	0	1722	No	Yes	No	Yes	Yes	Yes	4	4
CCA_RO_16	Fluke-Neg	Romania	F	58	Distal	No	Negative	Negative	Well-Moderate	T3N1M0	IIB	1	1513	No	Yes	No	No	No	No	N/A	N/A
CCA_RO_17	Fluke-Neg	Romania	M	61	Distal	No	Negative	Negative	Well	T3N0M0	IIIA	1	755	No	Yes	No	No	No	No	N/A	N/A
CCA_RO_18	Fluke-Neg	Romania	M	65.9726	Intrahepatic	No	Negative	Negative	Moderate	T1NXM0	N/A	1	190	No	Yes	No	Yes	No	No	N/A	N/A
CCA_RO_19	Fluke-Neg	Romania	F	65.7863	Intrahepatic	No	Negative	Negative	Moderate	T1NXM0	N/A	1	539	No	Yes	No	Yes	Yes	Yes	2	2
CCA_RO_20	Fluke-Neg	Romania	F	65	Perihilar	No	Negative	Negative	Well	T1N0M0	IA	0	1986	No	Yes	No	No	No	No	N/A	N/A
CCA_RO_21	Fluke-Neg	Romania	F	75.3616	Intrahepatic	No	Negative	Negative	Moderate	TNxMx	N/A	1	257	No	Yes	No	No	No	No	N/A	N/A
CCA_RO_22	Fluke-Neg	Romania	M	59	Perihilar	No	Negative	Negative	Well	T1N0M0	IA	1	582	No	Yes	No	No	No	No	N/A	N/A
CCA_RO_23	Fluke-Neg	Romania	F	53	Perihilar	No	Negative	Negative	Well	T4N1M0	III	1	301	No	Yes	No	Yes	Yes	Yes	2	2
CCA_RO_24	Fluke-Neg	Romania	M	51	Perihilar	No	Negative	Negative	Well	T3N1M0	IIIB	1	629	No	Yes	No	Yes	No	No	N/A	N/A
CCA_RO_25	Fluke-Neg	Romania	M	77.6822	Intrahepatic	No	Negative	Positive	Well	T3NXM0	N/A	1	362	No	Yes	No	Yes	Yes	Yes	3	3
CCA_RO_26	Fluke-Neg	Romania	M	30	Perihilar	No	Negative	Negative	Well	T1N0M0	I	1	1343	No	Yes	No	No	No	No	N/A	N/A
CCA_RO_27	Fluke-Neg	Romania	F	75.3699	Intrahepatic	No	Negative	Negative	Moderate	T3NxM0	N/A	1	167	No	Yes	No	Yes	No	No	N/A	N/A
CCA_RO_28	Fluke-Neg	Romania	M	49.4712	Intrahepatic	No	Negative	Negative	Moderate	T3NxM0	N/A	1	422	No	Yes	No	Yes	No	No	N/A	N/A
CCA_RO_29	Fluke-Neg	Romania	M	72	Perihilar	No	Negative	Negative	Well	T2N0M0	II	1	1210	No	Yes	No	Yes	Yes	Yes	2	2
CCA_RO_30	Fluke-Neg	Romania	M	72.2247	Perihilar	No	Negative	Negative	N/A	T4N0M0	IVA	1	270	No	Yes	No	No	No	No	N/A	N/A
CCA_RO_31	Fluke-Neg	Romania	M	58	Distal	No	Negative	Negative	Well	T1N1M0	IIB	1	735	No	Yes	No	Yes	Yes	Yes	2	2
CCA_RO_32	Fluke-Neg	Romania	M	61	Distal	No	Negative	Negative	Well	T2N0M0	IB	0	2401	No	Yes	No	Yes	No	No	N/A	N/A
CCA_RO_33	Fluke-Neg	Romania	F	69	Perihilar	No	Negative	Negative	Well	T1N0MX	IA	1	1892	No	Yes	No	No	No	No	N/A	N/A
CCA_RO_34	Fluke-Neg	Romania	F	50	Intrahepatic	No	Negative	Negative	N/A	T1NxM0	N/A	0	1173	No	Yes	No	Yes	No	No	N/A	N/A
CCA_RO_35	Fluke-Neg	Romania	M	62.1288	Intrahepatic	No	Negative	Negative	Moderate	T2bNxM0	N/A	1	472	No	Yes	No	Yes	Yes	Yes	2	2
CCA_RO_36	Fluke-Neg	Romania	M	44	Intrahepatic	No	Negative	Negative	Well	T4N1M0	III	1	947	No	Yes	No	Yes	No	No	N/A	N/A
CCA_RO_37	Fluke-Neg	Romania	M	49.5973	Intrahepatic	No	Negative	Negative	Moderate	T3NxM0	N/A	1	6	No	Yes	No	Yes	No	No	N/A	N/A
CCA_RO_38	Fluke-Neg	Romania	F	44	Intrahepatic	No	Negative	Negative	Moderate	T2bN1M0	IVA	1	575	No	Yes	No	Yes	Yes	Yes	4	4
CCA_RO_39	Fluke-Neg	Romania	M	31	Intrahepatic	Yes	Negative	Negative	Well	t2nxmo	TBA	0	2647	No	Yes	No	No	No	No	N/A	N/A
CCA_RO_40	Fluke-Neg	Romania	F	54	Perihilar	No	Negative	Negative	Well	T1N0M0	IA	0	2809	No	Yes	No	No	No	No	N/A	N/A
CCA_RO_41	Fluke-Neg	Romania	F	49	Intrahepatic	No	N/A	N/A	N/A	N/A	N/A	N/A	N/A	No	No	No	Yes	No	No	N/A	N/A
CCA_RO_42	Fluke-Neg	Romania	M	70	Distal	No	Negative	Negative	Moderate	T3N0M0	IIA	1	1500	No	No	No	No	Yes	Yes	N/A	2
CCA_RO_43	Fluke-Neg	Romania	M	40	Intrahepatic	Yes	N/A	N/A	Well	T3N2M0	IVA	1	210	No	No	No	No	Yes	Yes	N/A	N/A
CCA_RO_44	Fluke-Neg	Romania	F	61	Intrahepatic	No	Negative	Negative	Moderate	T3n0m1	IVB	1	159	No	No	No	No	No	Yes	N/A	N/A
CCA_RO_45	Fluke-Neg	Romania	M	69	Intrahepatic	No	N/A	N/A	Well	NA	NA	1	276	No	No	No	No	Yes	Yes	N/A	N/A
CCA_RO_46	Fluke-Neg	Romania	M	69	Distal	No	Negative	Negative	Well	T3N1M0	IIB	1	419	No	No	No	No	Yes	Yes	N/A	2
CCA_SG_1	Fluke-Neg	Singapore	F	73	Intrahepatic	No	Positive	Negative	Moderate	T3N0M0	III	0	232	Yes	No	No	Yes	Yes	Yes	2	2
CCA_SG_2	Fluke-Neg	Singapore	F	67	Intrahepatic	No	Positive	Negative	Moderate	T1N1M0	IVA	0	1154	Yes	No	No	Yes	Yes	Yes	4	4
CCA_SG_3	Fluke-Neg	Singapore	F	51	Intrahepatic	No	Negative	Negative	Moderate	T1N0M0	I	0	858	Yes	No	No	Yes	Yes	Yes	4	4
CCA_SG_4	Fluke-Neg	Singapore	M	61	Intrahepatic	No	Positive	Negative	Well	T1N0M0	I	0	2848	Yes	No	No	Yes	Yes	Yes	4	4
CCA_SG_5	Fluke-Neg	Singapore	F	78	Intrahepatic	No	Negative	Negative	Moderate	T1N1M0	IVA	0	523	Yes	No	No	Yes	Yes	Yes	2	2
CCA_SG_6	Fluke-Neg	Singapore	M	51	Intrahepatic	No	Negative	Negative	Moderate	T1N0M0	I	1	1381	Yes	No	No	Yes	Yes	Yes	4	4
CCA_SG_7	Fluke-Neg	Singapore	M	68	Extrahepatic	No	Negative	Negative	Moderate-Poor	T1N0M0	I	0	898	Yes	No	No	Yes	Yes	Yes	2	2
CCA_SG_8	Fluke-Neg	Singapore	M	57	Intrahepatic	No	Positive	Negative	Poor	T1N0M0	I	0	2150	Yes	No	No	Yes	Yes	Yes	3	3
CCA_SG_9	Fluke-Neg	Singapore	F	60	Intrahepatic	No	Negative	Negative	Moderate	T1N0M1	IVB	1	91	Yes	No	No	Yes	Yes	Yes	4	4
CCA_SG_10	Fluke-Neg	Singapore	M	74	Intrahepatic	No	Negative	Negative	Moderate	T1N0M0	I	0	841	Yes	No	No	Yes	Yes	Yes	4	4
CCA_SG_11	Fluke-Neg	Singapore	F	69	Intrahepatic	No	Negative	Negative	Moderate	T2aN1M0	IVA	0	517	Yes	No	No	Yes	Yes	Yes	4	4
CCA_SG_12	Fluke-Neg	Singapore	F	61	Intrahepatic	No	Positive	Negative	Moderate	T1N0M0	I	0	1540	Yes	No	No	Yes	Yes	Yes	4	4
CCA_SG_13	Fluke-Neg	Singapore	M	60	Intrahepatic	No	N/A	N/A	Well	T1N0M0	I	0	982	Yes	No	No	Yes	Yes	Yes	2	2
CCA_SG_14	Fluke-Neg	Singapore	F	61	Intrahepatic	No	Negative	Negative	Well	N/A	N/A	0	1114	Yes	No	No	Yes	Yes	Yes	2	2
CCA_SG_15	Fluke-Neg	Singapore	M	53	Intrahepatic	No	No record	No record	Well	T3N0M0	III	0	990	Yes	No	No	Yes	Yes	Yes	4	4
CCA_SG_16	Fluke-Neg	Singapore	M	55	Intrahepatic	No	Positive	Negative	Moderate	T3N0M0	III	0	867	Yes	No	No	Yes	Yes	Yes	4	4
CCA_SG_17	Fluke-Neg	Singapore	F	77	Intrahepatic	No	N/A	N/A	N/A	T2bN1M0	IVA	1	540	Yes	No	No	Yes	Yes	Yes	3	3
CCA_SG_18	Fluke-Neg	Singapore	F	71	Extrahepatic	No	Negative	Negative	Well	T3N0M0	IIA	0	129	Yes	No	No	Yes	Yes	Yes	2	2
CCA_SG_19	Fluke-Neg	Singapore	M	75	Intrahepatic	No	Negative	Negative	Moderate	T1aN0M0	II	0	554	Yes	No	No	Yes	Yes	Yes	4	4
CCA_SG_20	Fluke-Neg	Singapore	M	56	Intrahepatic	No	Negative	Negative	Well	T1N0M0	I	0	381	Yes	No	No	Yes	Yes	Yes	4	4
CCA_SG_21	Fluke-Neg	Singapore	F	55	Intrahepatic	No	Positive	Positive	Moderate	T4N0M0	IVA	0	1262	No	Yes	No	Yes	Yes	Yes	4	4
CCA_SG_22	Fluke-Neg	Singapore	M	65	Perihilar	No	N/A	N/A	Moderate	T1N0M0	I	1	16	No	Yes	No	No	No	No	N/A	N/A
CCA_SG_23	Fluke-Neg	Singapore	M	63	Intrahepatic	No	N/A	N/A	Moderate	T2bN1M1	IVB	0	99	No	Yes	No	No	No	No	N/A	N/A
CCA_SG_24	Fluke-Neg	Singapore	F	45	Perihilar	No	Negative	Negative	Moderate	T4N1M0	IVA	1	528	No	Yes	No	Yes	Yes	Yes	2	2
CCA_SG_25	Fluke-Neg	Singapore	F	74	Intrahepatic	No	Negative	Negative	Poor	T1N0M0	I	0	1129	No	Yes	No	Yes	Yes	Yes	4	4
CCA_SG_26	Fluke-Neg	Singapore	M	42	Perihilar	No	Negative	N/A	Moderate	T1N0M1	IV	0	392	No	Yes	No	Yes	No	No	N/A	N/A
CCA_SG_27	Fluke-Neg	Singapore	F	52	Intrahepatic	No	Negative	Negative	Well	T3N0M0	III	1	772	No	Yes	No	Yes	No	No	N/A	N/A
CCA_SG_28	Fluke-Neg	Singapore	F	67	Intrahepatic	No	Negative	Negative	Well	T1N0M0	I	0	1064	No	Yes	No	No	No	Yes	N/A	4
CCA_SG_29	Fluke-Neg	Singapore	F	39	Intrahepatic	No	Negative	N/A	Poor	T1N0M0	I	0	406	No	Yes	No	Yes	Yes	Yes	3	3
CCA_SG_30	Fluke-Neg	Singapore	M	62	Extrahepatic	No	Negative	Negative	Well	T3N1M0	IIB	0	242	No	Yes	No	No	No	No	N/A	N/A
CCA_SG_31	Fluke-Neg	Singapore	M	51	Intrahepatic	No	Positive	N/A	Moderate	T2bN1M1	IVB	0	41	No	Yes	No	No	No	No	N/A	N/A
CCA_SG_32	Fluke-Neg	Singapore	F	70	Perihilar	No	N/A	N/A	Moderate	T4N1M0	IVA	0	789	No	Yes	No	No	No	No	N/A	N/A
CCA_SG_33	Fluke-Neg	Singapore	F	68	Perihilar	No	N/A	N/A	Moderate	T3N0M0	IIIA	1	408	No	Yes	No	No	No	No	N/A	N/A
CCA_SG_34	Fluke-Neg	Singapore	M	35	Perihilar	No	N/A	N/A	TBA	T3N0M0	III	0	624	No	Yes	No	Yes	Yes	Yes	4	4
CCA_SG_35	Fluke-Neg	Singapore	F	59	Extrahepatic	No	N/A	N/A	Moderate	T3N1M0	IIB	1	483	No	Yes	No	No	No	No	N/A	N/A
CCA_SG_36	Fluke-Neg	Singapore	F	59	Intrahepatic	No	Negative	Negative	Moderate	T2aN0M0	II	0	357	No	Yes	No	No	No	Yes	N/A	N/A
CCA_SG_37	Fluke-Neg	Singapore	F	61	Perihilar	No	N/A	N/A	Moderate	T1N1M0	IVA	1	55	No	Yes	No	Yes	No	No	N/A	N/A
CCA_SG_38	Fluke-Neg	Singapore	F	46	Extrahepatic	No	N/A	N/A	Moderate to Poor	T3N1M0	IVA	N/A	233	No	Yes	No	No	No	No	N/A	N/A
CCA_SG_39	Fluke-Neg	Singapore	M	72	Extrahepatic	No	Negative	Negative	Moderate	T3N0M0	IIIA	0	247	No	Yes	No	No	No	No	N/A	N/A
CCA_SG_40	Fluke-Neg	Singapore	F	69	Intrahepatic	No	Negative	Negative	Moderate	T3Nx	N/A	0	517	No	Yes	No	No	No	No	N/A	N/A
CCA_SG_41	Fluke-Neg	Singapore	M	61	Intrahepatic	No	Positive	Negative	Well	T1Nx	N/A	0	2848	No	Yes	No	Yes	No	No	N/A	N/A
CCA_SG_42	Fluke-Neg	Singapore	F	71	Perihilar	No	N/A	N/A	Well	T1N1Mx	N/A	0	463	No	Yes	No	Yes	No	No	N/A	N/A
CCA_SG_43	Fluke-Neg	Singapore	F	70	Intrahepatic	No	Negative	Negative	Moderate	T3N0M0	III	1	3	No	Yes	No	Yes	No	No	N/A	N/A
CCA_SG_44	Fluke-Neg	Singapore	M	69	Intrahepatic	No	Negative	N/A	Moderate	T2bNxM1	4	1	99	No	Yes	No	Yes	No	No	N/A	N/A
CCA_SG_45	Fluke-Neg	Singapore	M	50	Intrahepatic	No	Negative	Negative	Moderate	T2N0M0	II	0	697	No	Yes	No	No	No	No	N/A	N/A
CCA_SG_46	Fluke-Neg	Singapore	F	69	Intrahepatic	No	Positive	Negative	Moderate	T2aN0M0	II	0	508	No	Yes	No	No	No	No	N/A	N/A
CCA_SG_47	Fluke-Neg	Singapore	M	52	Intrahepatic	No	N/A	N/A	Moderate	T1N0Mx	I	N/A	521	No	Yes	No	No	No	No	N/A	N/A
CCA_SG_48	Fluke-Neg	Singapore	F	77	Perihilar	No	N/A	N/A	N/A	TxN1Mx	N/A	0	74	No	No	No	No	Yes	Yes	N/A	2
CCA_SG_49	Fluke-Neg	Singapore	M	49	Perihilar	Yes	N/A	Negative	Moderate	T2bN0M0	II	0	1989	No	No	No	No	Yes	Yes	N/A	4
CCA_SG_50	Fluke-Neg	Singapore	M	32	Intrahepatic	No	Negative	Negative	Poor	T2bN1M1	IVB	1	341	No	No	No	No	Yes	Yes	N/A	4
CCA_SG_51	Fluke-Neg	Singapore	M	63	Intrahepatic	No	Negative	Negative	Moderate	T2aN0M0	II	0	415	No	No	No	No	Yes	Yes	N/A	N/A
CCA_SG_52	Fluke-Neg	Singapore	F	26	Intrahepatic	No	Negative	Negative	Moderate	T2bN0M0	II	0	348	No	No	No	No	Yes	Yes	N/A	N/A
CCA_SG_53	Fluke-Neg	Singapore	M	47	Perihilar	No	Negative	Negative	Moderate	T3N0M0	IIA	1	288	No	No	No	No	No	Yes	N/A	N/A
CCA_SG_54	Fluke-Neg	Singapore	F	60	Intrahepatic	No	N/A	N/A	Moderate	T3N1M1	IVB	0	232	No	No	No	No	Yes	Yes	N/A	4
CCA_TH_1	Fluke-Pos	Thailand	F	49	Intrahepatic	No	Positive	Negative	Moderate	T3N0M0	III	1	167	Yes	No	No	Yes	Yes	Yes	1	1
CCA_TH_2	Fluke-Pos	Thailand	M	46	Perihilar	No	N/A	N/A	Well	T3N0M0	IIIA	1	625	Yes	No	No	Yes	Yes	Yes	2	2
CCA_TH_3	Fluke-Pos	Thailand	F	76	Perihilar	No	N/A	N/A	Well	T3N0M0	IIIA	1	440	Yes	No	No	Yes	Yes	Yes	2	2
CCA_TH_4	Fluke-Pos	Thailand	M	53	Perihilar	No	N/A	N/A	Well	T3N1M1	IVB	1	30	Yes	No	No	No	Yes	Yes	N/A	N/A
CCA_TH_5	Fluke-Pos	Thailand	M	60	Perihilar	No	N/A	N/A	Papillary carcinoma	T4N0M0	IVA	1	360	Yes	No	No	Yes	Yes	Yes	1	1
CCA_TH_6	Fluke-Pos	Thailand	F	51	Intrahepatic	No	Negative	Negative	Well	T3N1M0	IVA	1	154	Yes	No	No	No	Yes	Yes	N/A	N/A
CCA_TH_7	Fluke-Pos	Thailand	M	61	Perihilar	No	Negative	Negative	Papillary carcinoma	T3N0M0	IIIB	1	456	Yes	No	No	Yes	Yes	Yes	2	2
CCA_TH_8	Fluke-Pos	Thailand	F	53	Intrahepatic	No	Negative	Negative	Well	T3N0M0	III	1	266	Yes	No	No	Yes	Yes	Yes	2	2
CCA_TH_9	Fluke-Pos	Thailand	M	48	Intrahepatic	No	Negative	Negative	Well	T3N0M0	III	0	373	Yes	No	No	No	Yes	Yes	N/A	N/A
CCA_TH_10	Fluke-Pos	Thailand	F	69	Intrahepatic	No	N/A	N/A	N/A	T3N1M0	IVA	0	1168	Yes	No	No	Yes	Yes	Yes	1	1
CCA_TH_11	Fluke-Pos	Thailand	F	79	Intrahepatic	No	N/A	N/A	Well	T4N0M0	IVA	1	228	Yes	No	No	Yes	Yes	Yes	1	1
CCA_TH_12	Fluke-Pos	Thailand	M	52	Perihilar	No	N/A	N/A	Well	T2aN1M0	IIIB	1	307	Yes	No	No	No	Yes	Yes	N/A	N/A
CCA_TH_13	Fluke-Pos	Thailand	M	57	Perihilar	No	N/A	N/A	Papillary carcinoma	T3N0M0	IIIA	0	1027	Yes	No	No	Yes	Yes	Yes	1	1
CCA_TH_14	Fluke-Pos	Thailand	F	64	Intrahepatic	No	N/A	N/A	Well	T3N0M0	III	1	117	Yes	No	No	Yes	No	Yes	N/A	1
CCA_TH_15	Fluke-Pos	Thailand	M	37	Perihilar	No	Negative	Negative	Papillary carcinoma	T4N1M0	IIIA	1	475	Yes	No	No	Yes	Yes	Yes	2	2
CCA_TH_16	Fluke-Pos	Thailand	F	61	Intrahepatic	No	Positive	Negative	Well	T3N0M0	III	1	149	Yes	No	No	Yes	Yes	No	N/A	N/A
CCA_TH_17	Fluke-Pos	Thailand	M	66	Intrahepatic	No	Negative	Negative	Well	T3N0M0	III	1	64	Yes	No	No	Yes	Yes	Yes	1	1
CCA_TH_18	Fluke-Pos	Thailand	M	56	Intrahepatic	No	N/A	N/A	Well	T4N1M0	IVA	1	157	Yes	No	No	Yes	Yes	Yes	1	1
CCA_TH_19	Fluke-Pos	Thailand	F	65	Intrahepatic	No	N/A	N/A	Papillary carcinoma	T3N0M0	III	1	177	Yes	No	No	Yes	Yes	Yes	1	1
CCA_TH_20	Fluke-Pos	Thailand	M	63	Intrahepatic	No	N/A	N/A	Papillary carcinoma	T4N1M0	IVA	1	557	Yes	No	No	Yes	Yes	Yes	1	1
CCA_TH_21	Fluke-Pos	Thailand	F	40	Intrahepatic	No	Negative	Negative	Papillary carcinoma	T1N0M0	I	0	2255	Yes	No	No	Yes	Yes	No	2	2
CCA_TH_22	Fluke-Pos	Thailand	F	56	Intrahepatic	No	Negative	Negative	Papillary carcinoma	T2N0M0	II	0	2099	Yes	No	No	Yes	Yes	Yes	1	1
CCA_TH_23	Fluke-Pos	Thailand	F	56	Perihilar	No	N/A	N/A	Papillary carcinoma	T1N0M0	I	1	1760	No	Yes	No	Yes	Yes	Yes	2	2
CCA_TH_24	Fluke-Pos	Thailand	M	52	Perihilar	No	N/A	N/A	Well	T3N1M0	IIIB	1	862	No	Yes	No	Yes	No	No	N/A	N/A
CCA_TH_25	Fluke-Pos	Thailand	M	53	Perihilar	No	N/A	N/A	Papillary carcinoma	T2bN0M0	II	1	935	No	Yes	No	Yes	No	No	N/A	N/A
CCA_TH_26	Fluke-Pos	Thailand	F	52	Intrahepatic	No	N/A	N/A	Papillary carcinoma	T1N0M0	I	1	523	No	Yes	No	Yes	No	No	N/A	N/A
CCA_TH_27	Fluke-Pos	Thailand	F	72	Intrahepatic	No	Negative	Negative	Poor	T3N1M0	IVA	1	1119	No	Yes	No	Yes	Yes	Yes	4	4
CCA_TH_28	Fluke-Pos	Thailand	F	52	Intrahepatic	No	Negative	Negative	Well	T3N1M0	IVA	1	945	No	Yes	No	Yes	Yes	Yes	3	3
CCA_TH_29	Fluke-Pos	Thailand	M	49	Perihilar	No	N/A	N/A	Well	T3N1M1	IVB	1	71	No	Yes	No	Yes	No	No	N/A	N/A
CCA_TH_30	Fluke-Pos	Thailand	M	52	Perihilar	No	N/A	N/A	Well	T2bN1M0	IIIB	1	540	No	Yes	No	No	No	No	N/A	N/A
CCA_TH_31	Fluke-Pos	Thailand	M	55	Intrahepatic	No	Negative	Negative	Well	T4N0M0	IVA	1	154	No	Yes	No	Yes	Yes	Yes	1	1
CCA_TH_32	Fluke-Pos	Thailand	M	50	Perihilar	No	N/A	N/A	Papillary carcinoma	T2bN1M0	IIIB	1	377	No	Yes	No	Yes	Yes	No	N/A	N/A
CCA_TH_33	Fluke-Pos	Thailand	M	53	Intrahepatic	No	Negative	Negative	Well	T3N1M0	IVA	1	592	No	Yes	No	Yes	No	No	N/A	N/A
CCA_TH_34	Fluke-Pos	Thailand	M	54	Intrahepatic	No	Negative	Negative	Well	T3N0M0	III	1	302	No	Yes	No	No	No	No	N/A	N/A
CCA_TH_35	Fluke-Pos	Thailand	M	76	Perihilar	No	N/A	N/A	Papillary carcinoma	T4N1M1	IVB	1	3	No	Yes	No	Yes	Yes	No	N/A	N/A
CCA_TH_36	Fluke-Pos	Thailand	F	63	Perihilar	No	N/A	N/A	Papillary carcinoma	T2aN0M0	II	1	402	No	Yes	No	No	No	No	N/A	N/A
CCA_TH_37	Fluke-Pos	Thailand	F	51	Intrahepatic	No	Negative	Negative	Papillary carcinoma	T3N0M0	III	1	358	No	Yes	No	No	No	No	N/A	N/A
CCA_TH_38	Fluke-Pos	Thailand	F	53	Intrahepatic	No	Negative	Negative	Papillary carcinoma	T3N1M0	IVA	1	156	No	Yes	No	No	No	No	N/A	N/A
CCA_TH_39	Fluke-Pos	Thailand	M	57	Intrahepatic	No	N/A	N/A	Papillary carcinoma	TisN0M0	0	0	1790	No	Yes	No	No	No	No	N/A	N/A
CCA_TH_40	Fluke-Pos	Thailand	M	61	Intrahepatic	No	Positive	Negative	Papillary carcinoma	T3N1M0	IVA	1	252	No	Yes	No	Yes	No	No	N/A	N/A
CCA_TH_41	Fluke-Pos	Thailand	M	61	Perihilar	No	N/A	N/A	Well	T3N1M1	IVB	1	369	No	Yes	No	Yes	No	No	N/A	N/A
CCA_TH_42	Fluke-Pos	Thailand	F	58	Perihilar	No	Negative	Negative	Papillary carcinoma	T1N0M0	I	0	1758	No	Yes	No	Yes	No	No	N/A	N/A
CCA_TH_43	Fluke-Pos	Thailand	F	38	Intrahepatic	No	N/A	N/A	Well	T2bN1M0	IVA	1	559	No	Yes	No	Yes	Yes	Yes	1	1
CCA_TH_44	Fluke-Pos	Thailand	M	64	Perihilar	No	N/A	N/A	Papillary carcinoma	T3N0M1	IVB	1	256	No	Yes	No	Yes	Yes	Yes	1	1
CCA_TH_45	Fluke-Pos	Thailand	M	55	Perihilar	No	Negative	Negative	Papillary carcinoma	T3N0M0	IIIA	1	237	No	Yes	No	No	No	No	N/A	N/A
CCA_TH_46	Fluke-Pos	Thailand	M	68	Intrahepatic	No	N/A	N/A	Papillary carcinoma	T3N1M0	IVA	1	731	No	Yes	No	No	No	No	N/A	N/A
CCA_TH_47	Fluke-Pos	Thailand	M	66	Perihilar	No	N/A	N/A	Papillary carcinoma	TisN0m0	0	0	1714	No	Yes	No	Yes	Yes	Yes	1	1
CCA_TH_48	Fluke-Pos	Thailand	M	67	Intrahepatic	No	N/A	N/A	Papillary carcinoma	T3N1M0	IVA	1	1317	No	Yes	No	Yes	No	No	N/A	N/A
CCA_TH_49	Fluke-Pos	Thailand	M	50	Perihilar	No	N/A	N/A	Well	T3N1M1	IVB	1	127	No	Yes	No	Yes	No	No	N/A	N/A
CCA_TH_50	Fluke-Pos	Thailand	M	60	Perihilar	No	N/A	N/A	Papillary carcinoma	T3N0M0	IIIA	0	1681	No	Yes	No	Yes	Yes	Yes	1	1
CCA_TH_51	Fluke-Pos	Thailand	M	53	Perihilar	No	N/A	N/A	Well	T3N0M0	IIIA	1	573	No	Yes	No	No	No	No	N/A	N/A
CCA_TH_52	Fluke-Pos	Thailand	M	57	Perihilar	No	N/A	N/A	Papillary carcinoma	T2aN0M0	II	1	447	No	Yes	No	No	No	No	N/A	N/A
CCA_TH_53	Fluke-Pos	Thailand	M	53	Intrahepatic	No	Positive	Negative	Moderate	T3N0M0	III	1	237	No	Yes	No	No	No	No	N/A	N/A
CCA_TH_54	Fluke-Pos	Thailand	M	58	Intrahepatic	No	N/A	N/A	Papillary carcinoma	TisN0M0	0	0	1581	No	Yes	No	Yes	No	No	N/A	N/A
CCA_TH_55	Fluke-Pos	Thailand	M	73	Intrahepatic	No	Negative	Negative	Well	T3N0M0	III	1	82	No	Yes	No	Yes	Yes	Yes	1	1
CCA_TH_56	Fluke-Pos	Thailand	M	56	Intrahepatic	No	Negative	Negative	Well	T2bN0M0	II	1	785	No	Yes	No	No	Yes	No	N/A	N/A
CCA_TH_57	Fluke-Pos	Thailand	M	63	Perihilar	No	N/A	N/A	Well	T3N1M1	IVB	1	111	No	Yes	No	Yes	No	No	N/A	N/A
CCA_TH_58	Fluke-Pos	Thailand	M	63	Perihilar	No	Negative	Negative	Well	T3N0M0	IIIA	0	1366	No	Yes	No	Yes	No	Yes	N/A	2
CCA_TH_59	Fluke-Pos	Thailand	M	47	Intrahepatic	No	N/A	N/A	Papillary carcinoma	T3N0M0	III	1	384	No	Yes	No	Yes	Yes	Yes	1	1
CCA_TH_60	Fluke-Pos	Thailand	M	50	Intrahepatic	No	N/A	N/A	Papillary carcinoma	T2aN0M0	II	0	1303	No	Yes	No	Yes	No	No	N/A	N/A
CCA_TH_61	Fluke-Pos	Thailand	M	60	Intrahepatic	No	N/A	N/A	Papillary carcinoma	TisN0M0	0	0	1280	No	Yes	No	No	No	No	N/A	N/A
CCA_TH_62	Fluke-Pos	Thailand	M	64	Perihilar	No	N/A	N/A	Papillary carcinoma	T3N1M0	IIIB	1	752	No	Yes	No	No	No	No	N/A	N/A
CCA_TH_63	Fluke-Pos	Thailand	M	44	Intrahepatic	No	N/A	N/A	Moderate	T2aN1M0	IVA	1	167	No	Yes	No	No	No	No	N/A	N/A
CCA_TH_64	Fluke-Pos	Thailand	F	60	Perihilar	No	N/A	N/A	Papillary carcinoma	T3N0M1	IVB	1	393	No	Yes	No	No	No	No	N/A	N/A
CCA_TH_65	Fluke-Pos	Thailand	M	42	Intrahepatic	No	N/A	N/A	Papillary carcinoma	T3N1M0	IVA	1	278	No	Yes	No	Yes	Yes	Yes	1	1
CCA_TH_66	Fluke-Pos	Thailand	M	62	Intrahepatic	No	N/A	N/A	Well	T3N0M0	III	1	728	No	Yes	No	No	No	No	N/A	N/A
CCA_TH_67	Fluke-Pos	Thailand	M	52	Perihilar	No	N/A	N/A	Poor	T3N1M1	IVB	1	61	No	Yes	No	Yes	No	Yes	N/A	4
CCA_TH_68	Fluke-Pos	Thailand	M	56	Intrahepatic	No	N/A	N/A	Papillary carcinoma	T3N1M1	IVB	1	351	No	Yes	No	No	No	No	N/A	N/A
CCA_TH_69	Fluke-Pos	Thailand	F	48	Intrahepatic	No	N/A	N/A	Papillary carcinoma	T2bN0M0	II	0	1111	No	Yes	No	Yes	Yes	Yes	4	4
CCA_TH_70	Fluke-Pos	Thailand	F	49	Intrahepatic	No	N/A	N/A	Papillary carcinoma	T3N1M0	IVA	1	115	No	Yes	No	Yes	Yes	No	N/A	N/A
CCA_TH_71	Fluke-Pos	Thailand	M	59	Intrahepatic	No	N/A	N/A	Well	T3N1M0	IVA	1	219	No	Yes	No	No	No	No	N/A	N/A
CCA_TH_72	Fluke-Pos	Thailand	M	66	Perihilar	No	N/A	N/A	Well	T2aN0M0	II	0	1091	No	Yes	No	Yes	Yes	Yes	1	1
CCA_TH_73	Fluke-Pos	Thailand	F	75	Perihilar	No	N/A	N/A	Papillary carcinoma	T2bN1M0	IIIB	1	100	No	Yes	No	No	No	No	N/A	N/A
CCA_TH_74	Fluke-Pos	Thailand	F	43	Intrahepatic	No	N/A	N/A	Well	T3N1M1	IVB	1	79	No	Yes	No	No	No	No	N/A	N/A
CCA_TH_75	Fluke-Pos	Thailand	M	52	Intrahepatic	No	N/A	N/A	Papillary carcinoma	T3N0M0	III	0	1037	No	Yes	No	Yes	Yes	Yes	2	2
CCA_TH_76	Fluke-Pos	Thailand	M	73	Intrahepatic	No	N/A	N/A	Papillary carcinoma	T2aN0M0	II	1	542	No	Yes	No	Yes	Yes	No	N/A	N/A
CCA_TH_77	Fluke-Pos	Thailand	M	59	Intrahepatic	No	N/A	N/A	Moderate	T3N1M0	IVA	1	212	No	Yes	No	No	No	No	N/A	N/A
CCA_TH_78	Fluke-Pos	Thailand	F	60	Intrahepatic	No	N/A	N/A	Well	T3N1M0	IVA	1	488	No	Yes	No	Yes	No	Yes	N/A	1
CCA_TH_79	Fluke-Pos	Thailand	M	64	Intrahepatic	No	N/A	N/A	Well	T3N1M0	IVA	1	505	No	Yes	No	Yes	Yes	Yes	2	2
CCA_TH_80	Fluke-Pos	Thailand	F	56	Perihilar	No	N/A	N/A	Papillary carcinoma	T3N1M0	IIIB	1	186	No	Yes	No	No	No	No	N/A	N/A
CCA_TH_81	Fluke-Pos	Thailand	M	49	Perihilar	No	N/A	N/A	Well	T4N0M1	IVB	1	577	No	Yes	No	Yes	Yes	Yes	1	1
CCA_TH_82	Fluke-Pos	Thailand	F	71	Perihilar	No	N/A	N/A	Well	T2bN0M0	II	1	302	No	Yes	No	No	No	No	N/A	N/A
CCA_TH_83	Fluke-Pos	Thailand	F	61	Perihilar	No	N/A	N/A	Papillary carcinoma	T3N0M0	IIIA	1	379	No	Yes	No	No	No	No	N/A	N/A
CCA_TH_84	Fluke-Pos	Thailand	M	50	Perihilar	No	N/A	N/A	Papillary carcinoma	T1N0M0	I	1	523	No	Yes	No	No	No	No	N/A	N/A
CCA_TH_85	Fluke-Pos	Thailand	F	52	Intrahepatic	No	N/A	N/A	Well	T2aN0M0	II	0	916	No	Yes	No	Yes	Yes	Yes	1	1
CCA_TH_86	Fluke-Pos	Thailand	M	70	Perihilar	No	N/A	N/A	Well	T2bN0M0	II	0	904	No	Yes	No	No	No	No	N/A	N/A
CCA_TH_87	Fluke-Pos	Thailand	M	67	Perihilar	No	N/A	N/A	Papillary carcinoma	T1N0M0	I	0	903	No	Yes	No	No	No	No	N/A	N/A
CCA_TH_88	Fluke-Pos	Thailand	M	64	Intrahepatic	No	N/A	N/A	Adenosquamous carcinoma	T3N0M0	III	1	457	No	Yes	No	Yes	Yes	No	N/A	N/A
CCA_TH_89	Fluke-Pos	Thailand	F	66	Intrahepatic	No	N/A	N/A	Moderate	T3N1M0	IVA	1	109	No	Yes	No	Yes	Yes	No	N/A	N/A
CCA_TH_90	Fluke-Pos	Thailand	M	56	Perihilar	No	N/A	N/A	Papillary carcinoma	T2aN0M0	II	0	863	No	Yes	No	No	No	No	N/A	N/A
CCA_TH_91	Fluke-Pos	Thailand	M	55	Intrahepatic	No	N/A	N/A	Well	T2aN0M0	II	0	852	No	Yes	No	No	No	No	N/A	N/A
CCA_TH_92	Fluke-Pos	Thailand	M	62	Intrahepatic	No	N/A	N/A	Papillary carcinoma	T3N0M0	III	1	381	No	Yes	No	No	No	No	N/A	N/A
CCA_TH_93	Fluke-Pos	Thailand	F	64	Intrahepatic	No	N/A	N/A	Well	T3N1M0	IVA	1	105	No	Yes	No	No	No	No	N/A	N/A
CCA_TH_94	Fluke-Pos	Thailand	M	52	Perihilar	No	N/A	N/A	Well	T2aN1M0	IIIB	0	804	No	Yes	No	No	No	No	N/A	N/A
CCA_TH_95	Fluke-Pos	Thailand	M	65	Intrahepatic	No	N/A	N/A	Well	T3N1M0	IVA	1	299	No	Yes	No	No	No	No	N/A	N/A
CCA_TH_96	Fluke-Pos	Thailand	F	44	Perihilar	No	N/A	N/A	Well	T4N1M0	IVA	1	264	No	Yes	No	No	No	No	N/A	N/A
CCA_TH_97	Fluke-Pos	Thailand	F	65	Perihilar	No	N/A	N/A	Papillary carcinoma	T3N0M0	IIIA	0	756	No	Yes	No	No	No	No	N/A	N/A
CCA_TH_98	Fluke-Pos	Thailand	F	45	Perihilar	No	N/A	N/A	Well	T4N1M0	IVA	1	78	No	Yes	No	No	No	No	N/A	N/A
CCA_TH_99	Fluke-Pos	Thailand	M	63	Intrahepatic	No	N/A	N/A	Papillary carcinoma	T2aN0M0	II	1	315	No	Yes	No	No	No	No	N/A	N/A
CCA_TH_100	Fluke-Pos	Thailand	M	54	Perihilar	No	N/A	N/A	Papillary carcinoma	T2bN1M0	IVB	0	714	No	Yes	No	No	No	No	N/A	N/A
CCA_TH_101	Fluke-Pos	Thailand	M	70	Intrahepatic	No	N/A	N/A	Papillary carcinoma	T3N0M0	III	1	297	No	Yes	No	No	No	No	N/A	N/A
CCA_TH_102	Fluke-Pos	Thailand	M	66	Intrahepatic	No	N/A	N/A	Adenosquamous carcinoma	T3N1M0	IVA	1	50	No	Yes	No	No	No	No	N/A	N/A
CCA_TH_103	Fluke-Pos	Thailand	F	60	Intrahepatic	No	N/A	N/A	Adenosquamous carcinoma	T3N0M0	III	1	83	No	Yes	No	No	No	No	N/A	N/A
CCA_TH_104	Fluke-Pos	Thailand	F	57	Perihilar	No	N/A	N/A	Papillary carcinoma	T3N0M1	IVB	1	34	No	Yes	No	No	No	No	N/A	N/A
CCA_TH_105	Fluke-Pos	Thailand	M	51	Intrahepatic	No	N/A	N/A	Adenosquamous carcinoma	T3N0M0	III	1	187	No	Yes	No	No	No	No	N/A	N/A
CCA_TH_106	Fluke-Pos	Thailand	M	64	Perihilar	No	N/A	N/A	Well	T2bN1M0	IIIB	1	149	No	Yes	No	No	No	No	N/A	N/A
CCA_TH_107	Fluke-Pos	Thailand	F	61	Perihilar	No	N/A	N/A	Papillary carcinoma	T2aN1M0	IIIB	0	435	No	Yes	No	No	No	No	N/A	N/A
CCA_TH_108	Fluke-Pos	Thailand	M	70	Intrahepatic	No	N/A	N/A	Moderate	T3N1M0	IVA	0	393	No	Yes	No	No	No	No	N/A	N/A
CCA_TH_109	Fluke-Pos	Thailand	F	60	Intrahepatic	No	N/A	N/A	Papillary carcinoma	T3N1M0	IVA	1	346	No	Yes	No	No	No	No	N/A	N/A
CCA_TH_110	Fluke-Pos	Thailand	F	53	Intrahepatic	No	N/A	N/A	Well	T3N0M0	III	1	321	No	Yes	No	No	No	No	N/A	N/A
CCA_TH_111	Fluke-Pos	Thailand	M	65	Perihilar	No	N/A	N/A	Papillary carcinoma	T2bN1M0	IIIB	1	72	No	Yes	No	No	No	No	N/A	N/A
CCA_TH_112	Fluke-Pos	Thailand	M	68	Intrahepatic	No	N/A	N/A	Papillary carcinoma	T1N0M0	I	0	218	No	Yes	No	No	No	No	N/A	N/A
CCA_TH_113	Fluke-Pos	Thailand	F	42	Perihilar	No	N/A	N/A	Papillary carcinoma	T1N0M0	I	0	151	No	Yes	No	No	No	No	N/A	N/A
CCA_TH_114	Fluke-Pos	Thailand	F	49	Perihilar	No	N/A	N/A	Well	T2bN1M0	IIIB	1	251	No	Yes	No	No	Yes	Yes	N/A	N/A
CCA_TH_115	Fluke-Pos	Thailand	M	50	Intrahepatic	No	N/A	N/A	Well	T3N0M0	III	1	222	No	Yes	No	No	No	No	N/A	N/A
CCA_TH_116	Fluke-Pos	Thailand	M	52	Intrahepatic	No	Negative	Negative	Moderate	T4N0M0	IVA	1	2253	No	Yes	No	No	No	No	N/A	N/A
CCA_TH_117	Fluke-Pos	Thailand	M	42	Perihilar	No	Negative	Negative	Well	T3N0M0	IIIA	1	351	No	Yes	No	No	No	No	N/A	N/A
CCA_TH_118	Fluke-Pos	Thailand	M	46	Perihilar	No	Negative	Negative	Papillary carcinoma	T3N0M0	IIIA	1	2493	No	Yes	No	No	No	No	N/A	N/A
CCA_TH_119	Fluke-Pos	Thailand	F	66	Intrahepatic	No	Negative	Negative	Papillary carcinoma	T2N1M0	IVA	1	148	No	Yes	No	No	No	No	N/A	N/A
CCA_TH_120	Fluke-Pos	Thailand	F	45	Intrahepatic	No	Negative	Negative	Papillary carcinoma	T3N1M0	IVA	1	1868	No	Yes	No	Yes	No	Yes	N/A	2
CCA_TH_121	Fluke-Pos	Thailand	M	70	Intrahepatic	No	Negative	Negative	Well	T4NXM0	IVA	1	210	No	Yes	No	Yes	Yes	Yes	1	1
CCA_TH_122	Fluke-Pos	Thailand	M	50	Intrahepatic	No	Negative	Negative	Papillary carcinoma	T3N1M0	IVA	1	180	No	Yes	No	Yes	Yes	Yes	1	1
CCA_TH_123	Fluke-Pos	Thailand	M	62	Intrahepatic	No	Negative	Negative	Papillary carcinoma	T4N0M0	IVA	1	1302	No	Yes	No	No	No	Yes	N/A	N/A
CCA_TH_124	Fluke-Pos	Thailand	M	69	Intrahepatic	No	Negative	Negative	Papillary carcinoma	T3N1M0	IVA	1	429	No	Yes	No	No	No	No	N/A	N/A
CCA_TH_125	Fluke-Pos	Thailand	F	51	Intrahepatic	No	Negative	Negative	Well	T4N1M0	IVA	1	157	No	Yes	No	No	No	No	N/A	N/A
CCA_TH_126	Fluke-Pos	Thailand	F	64	Intrahepatic	No	Negative	Negative	Well	T3N0M0	III	1	754	No	Yes	No	No	No	No	N/A	N/A
CCA_TH_127	Fluke-Pos	Thailand	F	51	Perihilar	No	Negative	Negative	Well	T4N0M0	IVA	1	609	No	Yes	No	Yes	Yes	Yes	1	1
CCA_TH_128	Fluke-Pos	Thailand	M	55	Perihilar	No	Negative	Negative	Well	T4N0M0	IVA	1	340	No	Yes	No	Yes	Yes	Yes	1	1
CCA_TH_129	Fluke-Pos	Thailand	M	69	Intrahepatic	No	Negative	Negative	Well	T4N1M0	IVA	1	876	No	Yes	No	No	No	No	N/A	N/A
CCA_TH_130	Fluke-Pos	Thailand	M	51	Perihilar	No	N/A	N/A	Papillary carcinoma	N/A	N/A	N/A	N/A	No	No	No	No	Yes	Yes	N/A	1
CCA_TH_131	Fluke-Pos	Thailand	M	52	Perihilar	No	N/A	N/A	Well	T3N1M0	IIIB	1	307	No	No	No	No	No	Yes	N/A	N/A
CCA_TH_132	Fluke-Pos	Thailand	M	57	Intrahepatic	No	N/A	N/A	Well	T3N1M0	IVA	1	416	No	No	No	No	No	Yes	N/A	N/A
CCA_TW_1	Fluke-Neg	Taiwan	M	53	Intrahepatic	N/A	Positive	Negative	N/A	N/A	I	N/A	1620	No	No	No	Yes	No	No	N/A	N/A
CCA_TW_2	Fluke-Neg	Taiwan	M	50	Intrahepatic	N/A	Positive	Negative	N/A	N/A	I	N/A	1556	No	No	No	Yes	No	No	N/A	N/A
CCA_TW_3	Fluke-Neg	Taiwan	F	55	Intrahepatic	N/A	Negative	Negative	N/A	N/A	IVA	N/A	284	No	No	No	Yes	No	No	N/A	N/A
CCA_TW_4	Fluke-Neg	Taiwan	M	48	Intrahepatic	N/A	Negative	Negative	N/A	N/A	III	N/A	2430	No	No	No	Yes	No	No	N/A	N/A
CCA_TW_5	Fluke-Neg	Taiwan	M	48	Intrahepatic	N/A	Negative	Negative	N/A	N/A	II	N/A	675	No	No	No	Yes	No	No	N/A	N/A
CCA_TW_6	Fluke-Neg	Taiwan	M	35	N/A	N/A	Positive	Negative	Poor	N/A	I	N/A	1140	No	No	No	Yes	No	No	N/A	N/A
CCA_TW_7	Fluke-Neg	Taiwan	M	68	Intrahepatic	N/A	Negative	Negative	Poor	N/A	I	N/A	1064	No	No	No	Yes	No	No	N/A	N/A
CCA_TW_8	Fluke-Neg	Taiwan	F	74	N/A	N/A	Negative	Negative	Moderate	N/A	IIA	N/A	342	No	No	No	Yes	No	No	N/A	N/A
CCA_TW_9	Fluke-Neg	Taiwan	F	77	N/A	N/A	Positive	Negative	Moderate	N/A	N/A	N/A	631	No	No	No	Yes	No	No	N/A	N/A
CCA_TW_10	Fluke-Neg	Taiwan	F	66	N/A	N/A	Negative	Negative	Moderate	N/A	N/A	N/A	990	No	No	No	Yes	No	No	N/A	N/A
N/A indicates data is not available

## Sheet: TableS1B
Supplementary Table 1B. Summary statistics of data
Clinical outcome data			Sequencing platforms
Fluke-association	number of cases		WGS	71
Fluke-Neg	356		Targeted sequencing	188
Fluke-Pos	133		WES (published Nakanuma et. al. Nat. Genet., 2015)	200
Opisthorchic viverrini	132		SNP array	175
Clonochis sinensis	1		Gene expression array	118
			Methylation array	138
Anatomical subtype
Distal	40
Extrahepatic	5
Intrahepatic	310
Perihilar	128
N/A	6
Association with risk factors
Primary Sclerosing cholangitis
Yes	5
No	464
N/A	20
HBV
Positive	26
Negative	338
N/A	125
HCV
Positive	14
Negative	347
N/A	128

## Sheet: TableS1C
Supplementary Table 1C. Coverage statistics for the 71 tumor-normal pairs analysed by whole-genome sequencingpairs.
Sample	Type	Average coverage	Proportion of genome with coverage of
			>=10x	>=20x	>=30x	>=50x	>=70x
CCA_IT_1	tumor	80.13	0.9942	0.9905	0.984	0.8959	0.6104
	normal	75.99	0.9946	0.9913	0.9876	0.9597	0.647
CCA_IT_2	tumor	74.85	0.9941	0.9906	0.9854	0.9263	0.6011
	normal	65.9	0.9936	0.9897	0.9839	0.8944	0.3047
CCA_IT_3	tumor	71.74	0.9944	0.9885	0.9739	0.8914	0.5373
	normal	76.53	0.9946	0.9909	0.9821	0.9123	0.6729
CCA_IT_4	tumor	80.5	0.9947	0.9873	0.9726	0.9097	0.7292
	normal	79.83	0.995	0.9916	0.9844	0.922	0.7569
CCA_JP_1	tumor	51.84	0.9925	0.9796	0.9249	0.5175	0.0683
	normal	30.39	0.9842	0.888	0.4985	0.0088	0.0032
CCA_JP_2	tumor	62.4	0.9942	0.9865	0.9503	0.7032	0.3037
	normal	41.74	0.9922	0.958	0.8434	0.1743	0.0063
CCA_JP_3	tumor	63.74	0.9944	0.9882	0.9635	0.7467	0.3264
	normal	45.32	0.9926	0.967	0.8743	0.314	0.0117
CCA_JP_4	tumor	66.4	0.9947	0.989	0.9673	0.7787	0.3913
	normal	41.05	0.9919	0.9564	0.8383	0.1522	0.0061
CCA_JP_5	tumor	70.7	0.9943	0.9881	0.966	0.8003	0.4768
	normal	44.16	0.9913	0.9546	0.8298	0.3075	0.0172
CCA_JP_6	tumor	81.09	0.9947	0.9883	0.9794	0.9044	0.6426
	normal	49.07	0.9928	0.9726	0.895	0.4457	0.0335
CCA_JP_7	tumor	66.29	0.9898	0.9786	0.943	0.7377	0.4026
	normal	49.66	0.9928	0.9734	0.8976	0.4666	0.0399
CCA_JP_8	tumor	82.76	0.9951	0.9911	0.9826	0.8994	0.6851
	normal	37.91	0.9903	0.9372	0.7615	0.0899	0.0048
CCA_JP_9	tumor	81.85	0.9901	0.9846	0.9625	0.7754	0.5903
	normal	45.46	0.9923	0.9654	0.8681	0.3258	0.0139
CCA_JP_10	tumor	63.47	0.9943	0.987	0.961	0.7873	0.3055
	normal	42.12	0.9921	0.9596	0.8478	0.1924	0.0067
CCA_RO_1	tumor	68.86	0.9943	0.9882	0.9682	0.8456	0.4488
	normal	66.19	0.9941	0.9885	0.9692	0.869	0.3807
CCA_RO_2	tumor	74.5	0.994	0.9893	0.9777	0.7871	0.5064
	normal	68.36	0.9945	0.9907	0.9855	0.9222	0.3906
CCA_RO_3	tumor	73.54	0.9928	0.9851	0.98	0.9072	0.558
	normal	67.92	0.9947	0.9899	0.9717	0.8814	0.435
CCA_RO_4	tumor	82.16	0.9949	0.9915	0.9877	0.9398	0.6461
	normal	73.48	0.9948	0.9915	0.9873	0.9463	0.554
CCA_RO_5	tumor	62.82	0.9941	0.9894	0.9784	0.7712	0.2923
	normal	62.79	0.9943	0.99	0.9845	0.8749	0.2154
CCA_RO_6	tumor	76.33	0.995	0.9913	0.9834	0.9042	0.6287
	normal	73	0.9949	0.9909	0.9796	0.9052	0.5765
CCA_RO_7	tumor	76.11	0.9948	0.9909	0.9826	0.886	0.5848
	normal	74.16	0.9949	0.991	0.9799	0.9038	0.5989
CCA_SG_1	tumor	75.43	0.9939	0.9884	0.9708	0.7912	0.4647
	normal	82.21	0.9949	0.9918	0.9886	0.9718	0.8087
CCA_SG_2	tumor	75.61	0.9949	0.9917	0.988	0.9565	0.6234
	normal	76.19	0.9946	0.9913	0.9876	0.9645	0.6644
CCA_SG_3	tumor	74.79	0.9947	0.9911	0.9866	0.9212	0.5714
	normal	73.37	0.9945	0.9907	0.9809	0.8182	0.4723
CCA_SG_4	tumor	50.86	0.9893	0.9533	0.8467	0.475	0.1044
	normal	52.42	0.9901	0.9635	0.8954	0.5315	0.1248
CCA_SG_5	tumor	65.48	0.9944	0.9904	0.9852	0.8785	0.3012
	normal	68.63	0.9941	0.9898	0.9843	0.934	0.4141
CCA_SG_6	tumor	55.21	0.9855	0.9633	0.8914	0.5924	0.1511
	normal	51.38	0.9866	0.9525	0.8737	0.5315	0.1184
CCA_SG_7	tumor	73.72	0.9951	0.9913	0.9793	0.8787	0.5821
	normal	77.16	0.9953	0.9918	0.983	0.9179	0.6964
CCA_SG_8	tumor	58.91	0.992	0.9812	0.9532	0.7258	0.2027
	normal	49.36	0.9907	0.9683	0.9083	0.4805	0.0342
CCA_SG_9	tumor	74.92	0.994	0.9851	0.9497	0.7458	0.4664
	normal	76.82	0.9947	0.9914	0.9874	0.9411	0.6382
CCA_SG_10	tumor	71.68	0.9937	0.9859	0.9584	0.8015	0.4573
	normal	64.79	0.9946	0.9894	0.9665	0.849	0.2914
CCA_SG_11	tumor	70.68	0.9945	0.9905	0.9846	0.8802	0.4608
	normal	72.09	0.9947	0.9912	0.9868	0.9321	0.494
CCA_SG_12	tumor	78.64	0.9949	0.9914	0.9869	0.9307	0.606
	normal	79.59	0.995	0.9917	0.9881	0.9689	0.7599
CCA_SG_13	tumor	72.62	0.9946	0.9885	0.9783	0.8633	0.5135
	normal	71	0.9947	0.989	0.969	0.8631	0.5158
CCA_SG_14	tumor	57.32	0.9921	0.981	0.9483	0.6637	0.176
	normal	58.79	0.9913	0.9788	0.9506	0.7139	0.2063
CCA_SG_15	tumor	56.48	0.9911	0.9736	0.9283	0.6404	0.1662
	normal	56.86	0.991	0.9728	0.9251	0.669	0.1811
CCA_SG_16	tumor	56.52	0.9911	0.9749	0.9262	0.6503	0.1827
	normal	53.8	0.9897	0.9663	0.9073	0.6031	0.1222
CCA_SG_17	tumor	57.35	0.992	0.9811	0.9503	0.6602	0.1867
	normal	60.35	0.9916	0.9784	0.9432	0.688	0.2771
CCA_SG_18	tumor	65.34	0.9942	0.99	0.983	0.8471	0.3297
	normal	63.85	0.994	0.9894	0.9834	0.8862	0.2579
CCA_SG_19	tumor	47.82	0.9838	0.9442	0.8273	0.4138	0.1003
	normal	51.66	0.9894	0.9625	0.8944	0.5425	0.0935
CCA_SG_20	tumor	75.76	0.9949	0.9913	0.9834	0.882	0.593
	normal	71.72	0.994	0.9857	0.9595	0.8228	0.5314
CCA_TH_1	tumor	70.98	0.9933	0.9878	0.9777	0.8816	0.5169
	normal	72.23	0.9932	0.9877	0.9802	0.9401	0.5698
CCA_TH_2	tumor	51.13	0.9871	0.9512	0.8541	0.4728	0.1383
	normal	45.53	0.9866	0.9409	0.8268	0.3687	0.0469
CCA_TH_3	tumor	56.49	0.9919	0.9736	0.9246	0.5472	0.2079
	normal	64.47	0.9934	0.9889	0.9824	0.8865	0.2784
CCA_TH_4	tumor	56.84	0.9903	0.9678	0.9114	0.6362	0.2185
	normal	59.14	0.9899	0.965	0.9054	0.6446	0.2823
CCA_TH_5	tumor	64.14	0.9927	0.9837	0.9639	0.8015	0.3671
	normal	68.77	0.9943	0.9897	0.974	0.8982	0.4727
CCA_TH_6	tumor	57.36	0.9876	0.9633	0.9047	0.6176	0.2473
	normal	56.16	0.9912	0.9782	0.9411	0.6316	0.1684
CCA_TH_7	tumor	64.66	0.993	0.9836	0.9558	0.7655	0.3723
	normal	58.61	0.9938	0.986	0.9553	0.7879	0.1442
CCA_TH_8	tumor	58.75	0.9917	0.9829	0.9648	0.7166	0.1805
	normal	62.53	0.9926	0.9857	0.9747	0.8484	0.2378
CCA_TH_9	tumor	78.91	0.9902	0.9823	0.9695	0.8361	0.6014
	normal	75.58	0.9941	0.9887	0.9743	0.8876	0.6451
CCA_TH_10	tumor	61.76	0.9935	0.9874	0.9741	0.7421	0.2481
	normal	66.24	0.994	0.9898	0.9844	0.9187	0.3385
CCA_TH_11	tumor	51.74	0.9878	0.9602	0.886	0.514	0.1399
	normal	51.38	0.9896	0.9694	0.91	0.5138	0.0966
CCA_TH_12	tumor	55.87	0.991	0.9721	0.9216	0.6523	0.1664
	normal	56.57	0.9909	0.9713	0.9195	0.6523	0.1867
CCA_TH_13	tumor	52.87	0.9858	0.9449	0.8554	0.5245	0.1796
	normal	55.77	0.9903	0.9682	0.9112	0.6241	0.1852
CCA_TH_14	tumor	74.55	0.9941	0.9888	0.9688	0.7668	0.4861
	normal	67.34	0.9945	0.9908	0.9853	0.9153	0.3486
CCA_TH_15	tumor	67.39	0.9942	0.9869	0.9742	0.8568	0.4175
	normal	63.07	0.9941	0.988	0.9645	0.8546	0.2779
CCA_TH_16	tumor	57.33	0.9922	0.9868	0.9717	0.6782	0.1413
	normal	41.53	0.9915	0.9735	0.805	0.2147	0.0322
CCA_TH_17	tumor	71.55	0.9459	0.8646	0.782	0.625	0.4747
	normal	73.4	0.9946	0.9912	0.9871	0.9542	0.5674
CCA_TH_18	tumor	73.79	0.981	0.9443	0.8907	0.7365	0.5187
	normal	76.81	0.9943	0.9882	0.9725	0.879	0.6559
CCA_TH_19	tumor	76.7	0.9917	0.9837	0.9648	0.8137	0.5372
	normal	75.07	0.9948	0.9911	0.9805	0.907	0.6367
CCA_TH_20	tumor	58.41	0.9938	0.9866	0.9555	0.7384	0.1822
	normal	57.9	0.9937	0.984	0.9477	0.7601	0.1439
CCA_TH_21	tumor	56.74	0.99	0.9731	0.9164	0.617	0.1832
	normal	56.42	0.9925	0.9848	0.97	0.7013	0.1059
CCA_TH_22	tumor	53.54	0.9903	0.9718	0.9167	0.5377	0.117
	normal	56.49	0.9871	0.9594	0.8933	0.5942	0.242
CCA_CH_1	tumor	76.81	0.9951	0.9918	0.988	0.9526	0.6557
	normal	82.76	0.9954	0.9926	0.99	0.9812	0.8485
CCA_CH_2	tumor	77.17	0.9952	0.9923	0.9892	0.9731	0.6819
	normal	81.08	0.9954	0.9925	0.9897	0.9779	0.7941
CCA_CH_3	tumor	70.1	0.9937	0.9858	0.9772	0.811	0.4299
	normal	80.1	0.9954	0.9923	0.9863	0.9299	0.7734
CCA_CH_4	tumor	74.19	0.995	0.9912	0.9832	0.9094	0.5963
	normal	72.45	0.995	0.9913	0.9802	0.9016	0.574
CCA_CH_5	tumor	73.66	0.9949	0.9907	0.9778	0.8735	0.5914
	normal	75.05	0.9952	0.9917	0.9821	0.9233	0.6665
CCA_CH_6	tumor	79.97	0.995	0.9919	0.9885	0.958	0.7271
	normal	77.9	0.9952	0.9922	0.9893	0.9733	0.666
CCA_CH_7	tumor	79.62	0.994	0.9905	0.9869	0.9402	0.6683
	normal	76.72	0.9951	0.992	0.9888	0.9734	0.675
CCA_CH_8	tumor	71.38	0.9947	0.9894	0.9785	0.8931	0.5182
	normal	83.54	0.9953	0.992	0.9858	0.9277	0.7741
Average		65.6007	0.992463	0.980101	0.945806	0.75332	0.386612
Median		67.365	0.994	0.9879	0.9704	0.8205	0.39695
