# Supplementary material for: Whole-Genome and Epigenomic Landscapes of Etiologically Distinct Subtypes of Cholangiocarcinoma
Source: Oxford University Press journal article supplement (doi:10.1158/2159-8290.cd-17-0368), 2017-06-30
Supplement: 21598290cd170368-sup-181437_2_supp_4118312_3ryl3l.xlsx [file 21598290cd170368-sup-181437_2_supp_4118312_3ryl3l.xlsx]

## Sheet: TableS2A
Supplementary Table 2A. Aberrant Pathways in Each Cluster Based on GSEA Analysis
Cluster	Expression change	Pathway	nominal p
1	upregulation	REACTOME_PROCESSING_OF_CAPPED_INTRONLESS_PRE_MRNA	0
1	upregulation	REACTOME_GLYCEROPHOSPHOLIPID_BIOSYNTHESIS	0
1	upregulation	REACTOME_SYNTHESIS_OF_PA	0.00197239
1	upregulation	REACTOME_GRB2_EVENTS_IN_ERBB2_SIGNALING	0.00389105
1	upregulation	REACTOME_ACYL_CHAIN_REMODELLING_OF_PE	0.00391389
1	upregulation	REACTOME_CLEAVAGE_OF_GROWING_TRANSCRIPT_IN_THE_TERMINATION_REGION_	0.00398406
1	upregulation	KEGG_FRUCTOSE_AND_MANNOSE_METABOLISM	0.004
1	upregulation	REACTOME_TRANSPORT_OF_GLUCOSE_AND_OTHER_SUGARS_BILE_SALTS_AND_ORGANIC_ACIDS_METAL_IONS_AND_AMINE_COMPOUNDS	0.00562852
1	upregulation	REACTOME_PHOSPHOLIPID_METABOLISM	0.0078125
1	upregulation	REACTOME_SYNTHESIS_OF_PC	0.00990099
1	downregulation	REACTOME_RECEPTOR_LIGAND_BINDING_INITIATES_THE_SECOND_PROTEOLYTIC_CLEAVAGE_OF_NOTCH_RECEPTOR	0
1	downregulation	REACTOME_CHONDROITIN_SULFATE_BIOSYNTHESIS	0
1	downregulation	REACTOME_MYOGENESIS	0.00195695
1	downregulation	KEGG_GLYCOSAMINOGLYCAN_BIOSYNTHESIS_CHONDROITIN_SULFATE	0.00205761
1	downregulation	REACTOME_ROLE_OF_SECOND_MESSENGERS_IN_NETRIN1_SIGNALING	0.0040404
1	downregulation	REACTOME_SIGNALING_BY_NOTCH2	0.00582524
1	downregulation	REACTOME_SPHINGOLIPID_DE_NOVO_BIOSYNTHESIS	0.00925926
2	upregulation	BIOCARTA_HDAC_PATHWAY	0
2	upregulation	PID_ENDOTHELIN_PATHWAY	0
2	upregulation	KEGG_LONG_TERM_DEPRESSION	0.00194553
2	upregulation	PID_ALPHA_SYNUCLEIN_PATHWAY	0.004
2	upregulation	PID_RHOA_PATHWAY	0.00406504
2	upregulation	BIOCARTA_CCR3_PATHWAY	0.00772201
2	upregulation	PID_DELTA_NP63_PATHWAY	0.00796813
2	upregulation	PID_THROMBIN_PAR4_PATHWAY	0.00826446
2	downregulation	REACTOME_INSULIN_RECEPTOR_SIGNALLING_CASCADE	0
2	downregulation	REACTOME_ACTIVATION_OF_THE_MRNA_UPON_BINDING_OF_THE_CAP_BINDING_COMPLEX_AND_EIFS_AND_SUBSEQUENT_BINDING_TO_43S	0.00957854
2	downregulation	REACTOME_NEUROTRANSMITTER_RELEASE_CYCLE	0.00972763
3	upregulation	REACTOME_IL_RECEPTOR_SHC_SIGNALING	0
3	upregulation	REACTOME_ADAPTIVE_IMMUNE_SYSTEM	0.00199203
3	upregulation	REACTOME_IMMUNOREGULATORY_INTERACTIONS_BETWEEN_A_LYMPHOID_AND_A_NON_LYMPHOID_CELL	0.00201613
3	upregulation	REACTOME_IMMUNE_SYSTEM	0.00202429
3	upregulation	REACTOME_CELL_SURFACE_INTERACTIONS_AT_THE_VASCULAR_WALL	0.00203666
3	upregulation	BIOCARTA_ATM_PATHWAY	0.002079
3	upregulation	REACTOME_P75_NTR_RECEPTOR_MEDIATED_SIGNALLING	0.00375235
3	upregulation	BIOCARTA_NKT_PATHWAY	0.00391389
3	upregulation	BIOCARTA_NO2IL12_PATHWAY	0.00596422
3	upregulation	REACTOME_ANTIGEN_PROCESSING_CROSS_PRESENTATION	0.00623701
3	upregulation	REACTOME_CD28_CO_STIMULATION	0.00772201
3	upregulation	PID_TCPTP_PATHWAY	0.00801603
3	upregulation	ST_T_CELL_SIGNAL_TRANSDUCTION	0.00990099
3	downregulation	BIOCARTA_SARS_PATHWAY	0.0019802
3	downregulation	REACTOME_OLFACTORY_SIGNALING_PATHWAY	0.00608519
4	upregulation	REACTOME_INSULIN_RECEPTOR_SIGNALLING_CASCADE	0.00191939
4	upregulation	REACTOME_BETA_DEFENSINS	0.0019685
4	upregulation	REACTOME_SIGNALING_BY_BMP	0.00606061
4	upregulation	BIOCARTA_KREB_PATHWAY	0.00813008
4	upregulation	REACTOME_PI3K_CASCADE	0.00980392
4	downregulation	PID_PI3KCI_AKT_PATHWAY	0
4	downregulation	REACTOME_SYNTHESIS_OF_PA	0
4	downregulation	KEGG_ALPHA_LINOLENIC_ACID_METABOLISM	0
4	downregulation	BIOCARTA_CCR3_PATHWAY	0.00198413
4	downregulation	REACTOME_ACYL_CHAIN_REMODELLING_OF_PS	0.00199203
4	downregulation	REACTOME_REGULATION_OF_KIT_SIGNALING	0.00390625
4	downregulation	REACTOME_FACTORS_INVOLVED_IN_MEGAKARYOCYTE_DEVELOPMENT_AND_PLATELET_PRODUCTION	0.00403226
4	downregulation	KEGG_LONG_TERM_DEPRESSION	0.00587084
4	downregulation	BIOCARTA_SPPA_PATHWAY	0.00590551
4	downregulation	PID_RAS_PATHWAY	0.00803213
4	downregulation	PID_S1P_S1P2_PATHWAY	0.0093633

## Sheet: TableS2B
Supplementary Table 2B. Amplified chromosomal regions and genes in Cluster 3
Left: Amplification frequencies of chromosome arms in and outside Cluster 3. Significantly-amplified chromosome arms in Cluster 3 are defined those >50% amplified in Cluster 3, with significant association with Cluster 3 (q < 0.1, Fisher's exact test)
Right: Significantly-amplified genes in Cluster 3, defined as being >50% amplified in Cluster 3, with significant association with Cluster 3 (q < 0.1, Fisher's exact test)
Arm	Amplification frequency in Cluster 3	Amplification frequency outside Cluster 3	p	q	> 50% amplified in Cluster 3, q < 0.1			Gene Symbol	Cytoband	Amplification frequency in Cluster 3	Amplification frequency outside Cluster 3	p	q
1p	0.571429	0.103448	0.00638093	0.0616899	Yes			DDX11L1|chr1	1p36.33	0.571429	0.0804598	0.00311958	0.038149
1q	0.428571	0.390805	0.570563	0.691591				FAM138A|chr1	1p36.33	0.571429	0.0804598	0.00311958	0.038149
2p	0.714286	0.114943	0.000943161	0.0188632	Yes			FAM138F|chr1	1p36.33	0.571429	0.0804598	0.00311958	0.038149
2q	0.857143	0.172414	0.000398359	0.0159344	Yes			LOC100132062|chr1	1p36.33	0.571429	0.0804598	0.00311958	0.038149
3p	0.428571	0.045977	0.00798128	0.0616899				LOC100132287|chr1	1p36.33	0.571429	0.0804598	0.00311958	0.038149
3q	0.571429	0.206897	0.0497387	0.132637				LOC100133331|chr1	1p36.33	0.571429	0.0804598	0.00311958	0.038149
4p	0	0.0574713	1	1				LOC100288069	1p36.33	0.571429	0.0804598	0.00311958	0.038149
4q	0	0.0344828	1	1				LOC729737	1p36.33	0.571429	0.0804598	0.00311958	0.038149
5p	0.571429	0.206897	0.0497387	0.132637				OR4F16|chr1	1p36.33	0.571429	0.0804598	0.00311958	0.038149
5q	0.285714	0.0689655	0.107605	0.215209				OR4F29|chr1	1p36.33	0.571429	0.0804598	0.00311958	0.038149
6p	0.428571	0.137931	0.0782772	0.173949				OR4F3|chr1	1p36.33	0.571429	0.0804598	0.00311958	0.038149
6q	0.285714	0.0344828	0.0429924	0.132284				OR4F5	1p36.33	0.571429	0.0804598	0.00311958	0.038149
7p	0.714286	0.252874	0.0194624	0.0778497	Yes			WASH7P	1p36.33	0.571429	0.0804598	0.00311958	0.038149
7q	0.428571	0.229885	0.226449	0.393825				hsa-mir-1302-2	1p36.33	0.571429	0.0804598	0.00311958	0.038149
8p	0.142857	0.0574713	0.379795	0.523855				LINC00115	1p36.33	0.571429	0.0804598	0.00311958	0.038149
8q	0.428571	0.356322	0.496644	0.620805				LOC643837	1p36.33	0.571429	0.0804598	0.00311958	0.038149
9p	0.142857	0.0114943	0.144132	0.274537				FAM41C	1p36.33	0.571429	0.0804598	0.00311958	0.038149
9q	0.142857	0.0344828	0.270079	0.450132				LOC100130417	1p36.33	0.571429	0.0804598	0.00311958	0.038149
10p	0.142857	0.137931	0.660291	0.776813				SAMD11	1p36.33	0.571429	0.0804598	0.00311958	0.038149
10q	0	0.0804598	1	1				NOC2L	1p36.33	0.571429	0.0804598	0.00311958	0.038149
11p	0.142857	0.0574713	0.379795	0.523855				KLHL17	1p36.33	0.571429	0.0804598	0.00311958	0.038149
11q	0.142857	0.0804598	0.475062	0.612983				PLEKHN1	1p36.33	0.571429	0.0804598	0.00311958	0.038149
12p	0.285714	0.149425	0.309468	0.495149				C1orf170	1p36.33	0.571429	0.0804598	0.00311958	0.038149
12q	0.142857	0.0574713	0.379795	0.523855				HES4	1p36.33	0.571429	0.0804598	0.00311958	0.038149
13q	0	0.0804598	1	1				ISG15	1p36.33	0.571429	0.0804598	0.00311958	0.038149
14q	0.142857	0.0229885	0.209252	0.380459				AGRN	1p36.33	0.571429	0.0804598	0.00311958	0.038149
15q	0	0.103448	1	1				C1orf159	1p36.33	0.571429	0.0804598	0.00311958	0.038149
16p	0.571429	0.126437	0.0114887	0.0616899	Yes			RNF223	1p36.33	0.571429	0.0804598	0.00311958	0.038149
16q	0.142857	0.0574713	0.379795	0.523855				LOC254099	1p36.33	0.571429	0.0804598	0.00311958	0.038149
17p	0.285714	0.045977	0.0621289	0.146186				MIR200A	1p36.33	0.571429	0.0804598	0.00311958	0.038149
17q	0.571429	0.218391	0.0583378	0.145844				MIR200B	1p36.33	0.571429	0.0804598	0.00311958	0.038149
18p	0.428571	0.149425	0.0929095	0.195599				MIR429	1p36.33	0.571429	0.0804598	0.00311958	0.038149
18q	0	0.0689655	1	1				hsa-mir-200a	1p36.33	0.571429	0.0804598	0.00311958	0.038149
19p	0.142857	0.0689655	0.429129	0.572173				hsa-mir-200b	1p36.33	0.571429	0.0804598	0.00311958	0.038149
19q	0.571429	0.137931	0.0148704	0.0660907	Yes			hsa-mir-429	1p36.33	0.571429	0.0804598	0.00311958	0.038149
20p	0.428571	0.0574713	0.012338	0.0616899				TTLL10	1p36.33	0.571429	0.0804598	0.00311958	0.038149
20q	0.571429	0.16092	0.0235427	0.0822096	Yes			TNFRSF18	1p36.33	0.571429	0.0804598	0.00311958	0.038149
21p	0.428571	0.0574713	0.012338	0.0616899				TNFRSF4	1p36.33	0.571429	0.0804598	0.00311958	0.038149
21q	0.428571	0.045977	0.00798128	0.0616899				SDF4	1p36.33	0.571429	0.0804598	0.00311958	0.038149
22q	0.428571	0.0804598	0.0246629	0.0822096				B3GALT6	1p36.33	0.571429	0.0804598	0.00311958	0.038149
								FAM132A	1p36.33	0.571429	0.0804598	0.00311958	0.038149
								UBE2J2	1p36.33	0.571429	0.0804598	0.00311958	0.038149
								SCNN1D	1p36.33	0.571429	0.0804598	0.00311958	0.038149
								ACAP3	1p36.33	0.571429	0.0804598	0.00311958	0.038149
								CPSF3L	1p36.33	0.571429	0.0804598	0.00311958	0.038149
								PUSL1	1p36.33	0.571429	0.0804598	0.00311958	0.038149
								GLTPD1	1p36.33	0.571429	0.0804598	0.00311958	0.038149
								TAS1R3	1p36.33	0.571429	0.0804598	0.00311958	0.038149
								DVL1	1p36.33	0.571429	0.0804598	0.00311958	0.038149
								MXRA8	1p36.33	0.571429	0.0804598	0.00311958	0.038149
								AURKAIP1	1p36.33	0.571429	0.0804598	0.00311958	0.038149
								CCNL2	1p36.33	0.571429	0.0804598	0.00311958	0.038149
								LOC148413	1p36.33	0.571429	0.0804598	0.00311958	0.038149
								MRPL20	1p36.33	0.571429	0.0804598	0.00311958	0.038149
								ANKRD65	1p36.33	0.571429	0.0804598	0.00311958	0.038149
								TMEM88B	1p36.33	0.571429	0.0804598	0.00311958	0.038149
								ATAD3C	1p36.33	0.571429	0.0804598	0.00311958	0.038149
								VWA1	1p36.33	0.571429	0.0804598	0.00311958	0.038149
								ATAD3B	1p36.33	0.571429	0.0804598	0.00311958	0.038149
								ATAD3A	1p36.33	0.571429	0.0804598	0.00311958	0.038149
								TMEM240	1p36.33	0.571429	0.0804598	0.00311958	0.038149
								SSU72	1p36.33	0.571429	0.0804598	0.00311958	0.038149
								C1orf233	1p36.33	0.571429	0.0804598	0.00311958	0.038149
								MIB2	1p36.33	0.571429	0.0804598	0.00311958	0.038149
								CDK11B	1p36.33	0.571429	0.0804598	0.00311958	0.038149
								MMP23A	1p36.33	0.571429	0.0804598	0.00311958	0.038149
								MMP23B	1p36.33	0.571429	0.0804598	0.00311958	0.038149
								SLC35E2B	1p36.33	0.571429	0.0804598	0.00311958	0.038149
								CDK11A	1p36.33	0.571429	0.0804598	0.00311958	0.038149
								SLC35E2	1p36.33	0.571429	0.0804598	0.00311958	0.038149
								NADK	1p36.33	0.571429	0.0804598	0.00311958	0.038149
								GNB1	1p36.33	0.571429	0.0804598	0.00311958	0.038149
								CALML6	1p36.33	0.571429	0.0804598	0.00311958	0.038149
								TMEM52	1p36.33	0.571429	0.0804598	0.00311958	0.038149
								KIAA1751	1p36.33	0.571429	0.0804598	0.00311958	0.038149
								GABRD	1p36.33	0.571429	0.0804598	0.00311958	0.038149
								PRKCZ	1p36.33	0.571429	0.0804598	0.00311958	0.038149
								C1orf86	1p36.33	0.571429	0.0804598	0.00311958	0.038149
								SKI	1p36.33	0.571429	0.0804598	0.00311958	0.038149
								MORN1	1p36.33	0.571429	0.0804598	0.00311958	0.038149
								LOC100129534	1p36.33	0.571429	0.0804598	0.00311958	0.038149
								RER1	1p36.32	0.571429	0.0804598	0.00311958	0.038149
								PEX10	1p36.32	0.571429	0.0804598	0.00311958	0.038149
								PLCH2	1p36.32	0.571429	0.0804598	0.00311958	0.038149
								PANK4	1p36.32	0.571429	0.0804598	0.00311958	0.038149
								HES5	1p36.32	0.571429	0.0804598	0.00311958	0.038149
								LOC100133445	1p36.32	0.571429	0.0804598	0.00311958	0.038149
								LOC115110	1p36.32	0.571429	0.0804598	0.00311958	0.038149
								TNFRSF14	1p36.32	0.571429	0.0804598	0.00311958	0.038149
								FAM213B	1p36.32	0.571429	0.0804598	0.00311958	0.038149
								MMEL1	1p36.32	0.571429	0.0804598	0.00311958	0.038149
								TTC34	1p36.32	0.571429	0.0804598	0.00311958	0.038149
								ACTRT2	1p36.32	0.571429	0.0804598	0.00311958	0.038149
								FLJ42875	1p36.32	0.571429	0.0804598	0.00311958	0.038149
								PRDM16	1p36.32	0.571429	0.0804598	0.00311958	0.038149
								MIR4251	1p36.32	0.571429	0.0804598	0.00311958	0.038149
								hsa-mir-4251	1p36.32	0.571429	0.0804598	0.00311958	0.038149
								ARHGEF16	1p36.32	0.571429	0.0804598	0.00311958	0.038149
								MEGF6	1p36.32	0.571429	0.0804598	0.00311958	0.038149
								MIR551A	1p36.32	0.571429	0.0804598	0.00311958	0.038149
								hsa-mir-551a	1p36.32	0.571429	0.0804598	0.00311958	0.038149
								TPRG1L	1p36.32	0.571429	0.0804598	0.00311958	0.038149
								WRAP73	1p36.32	0.571429	0.0804598	0.00311958	0.038149
								TP73	1p36.32	0.571429	0.0804598	0.00311958	0.038149
								TP73-AS1	1p36.32	0.571429	0.0804598	0.00311958	0.038149
								CCDC27	1p36.32	0.571429	0.0804598	0.00311958	0.038149
								LOC388588	1p36.32	0.571429	0.0804598	0.00311958	0.038149
								LRRC47	1p36.32	0.571429	0.0804598	0.00311958	0.038149
								CEP104	1p36.32	0.571429	0.0804598	0.00311958	0.038149
								DFFB	1p36.32	0.571429	0.0804598	0.00311958	0.038149
								C1orf174	1p36.32	0.571429	0.0804598	0.00311958	0.038149
								LOC100133612	1p36.32	0.571429	0.0804598	0.00311958	0.038149
								LOC728716	1p36.32	0.571429	0.0804598	0.00311958	0.038149
								LOC284661	1p36.32	0.571429	0.0804598	0.00311958	0.038149
								AJAP1	1p36.32	0.571429	0.0804598	0.00311958	0.038149
								MIR4417	1p36.31	0.571429	0.0804598	0.00311958	0.038149
								MIR4689	1p36.31	0.571429	0.0804598	0.00311958	0.038149
								NPHP4	1p36.31	0.571429	0.0804598	0.00311958	0.038149
								KCNAB2	1p36.31	0.571429	0.0804598	0.00311958	0.038149
								CHD5	1p36.31	0.571429	0.0804598	0.00311958	0.038149
								RPL22	1p36.31	0.571429	0.0804598	0.00311958	0.038149
								RNF207	1p36.31	0.571429	0.0804598	0.00311958	0.038149
								ICMT	1p36.31	0.571429	0.0804598	0.00311958	0.038149
								HES3	1p36.31	0.571429	0.0804598	0.00311958	0.038149
								GPR153	1p36.31	0.571429	0.0804598	0.00311958	0.038149
								ACOT7	1p36.31	0.571429	0.0804598	0.00311958	0.038149
								HES2	1p36.31	0.571429	0.0804598	0.00311958	0.038149
								ESPN	1p36.31	0.571429	0.0804598	0.00311958	0.038149
								MIR4252	1p36.31	0.571429	0.0804598	0.00311958	0.038149
								hsa-mir-4252	1p36.31	0.571429	0.0804598	0.00311958	0.038149
								TNFRSF25	1p36.31	0.571429	0.0804598	0.00311958	0.038149
								PLEKHG5	1p36.31	0.571429	0.0804598	0.00311958	0.038149
								NOL9	1p36.31	0.571429	0.0804598	0.00311958	0.038149
								TAS1R1	1p36.31	0.571429	0.0804598	0.00311958	0.038149
								ZBTB48	1p36.31	0.571429	0.0804598	0.00311958	0.038149
								KLHL21	1p36.31	0.571429	0.0804598	0.00311958	0.038149
								PHF13	1p36.31	0.571429	0.0804598	0.00311958	0.038149
								THAP3	1p36.31	0.571429	0.0804598	0.00311958	0.038149
								DNAJC11	1p36.31	0.571429	0.0804598	0.00311958	0.038149
								CAMTA1	1p36.31	0.571429	0.0804598	0.00311958	0.038149
								VAMP3	1p36.23	0.571429	0.0804598	0.00311958	0.038149
								PER3	1p36.23	0.571429	0.0804598	0.00311958	0.038149
								UTS2	1p36.23	0.571429	0.0804598	0.00311958	0.038149
								TNFRSF9	1p36.23	0.571429	0.0804598	0.00311958	0.038149
								PARK7	1p36.23	0.571429	0.0804598	0.00311958	0.038149
								ERRFI1	1p36.23	0.571429	0.0804598	0.00311958	0.038149
								SLC45A1	1p36.23	0.571429	0.0804598	0.00311958	0.038149
								RERE	1p36.23	0.571429	0.0804598	0.00311958	0.038149
								ENO1	1p36.23	0.571429	0.0804598	0.00311958	0.038149
								ENO1-AS1	1p36.23	0.571429	0.0804598	0.00311958	0.038149
								CA6	1p36.23	0.571429	0.0804598	0.00311958	0.038149
								SLC2A7	1p36.23	0.571429	0.0804598	0.00311958	0.038149
								SLC2A5	1p36.23	0.571429	0.0804598	0.00311958	0.038149
								GPR157	1p36.23	0.571429	0.0804598	0.00311958	0.038149
								MIR34A	1p36.22	0.571429	0.0804598	0.00311958	0.038149
								hsa-mir-34a	1p36.22	0.571429	0.0804598	0.00311958	0.038149
								H6PD	1p36.22	0.571429	0.0804598	0.00311958	0.038149
								SPSB1	1p36.22	0.571429	0.0804598	0.00311958	0.038149
								SLC25A33	1p36.22	0.571429	0.0804598	0.00311958	0.038149
								TMEM201	1p36.22	0.571429	0.0804598	0.00311958	0.038149
								C1orf200	1p36.22	0.571429	0.0804598	0.00311958	0.038149
								PIK3CD	1p36.22	0.571429	0.0804598	0.00311958	0.038149
								CLSTN1	1p36.22	0.571429	0.0804598	0.00311958	0.038149
								CTNNBIP1	1p36.22	0.571429	0.0804598	0.00311958	0.038149
								LZIC	1p36.22	0.571429	0.0804598	0.00311958	0.038149
								NMNAT1	1p36.22	0.571429	0.0804598	0.00311958	0.038149
								RBP7	1p36.22	0.571429	0.0804598	0.00311958	0.038149
								UBE4B	1p36.22	0.571429	0.0804598	0.00311958	0.038149
								KIF1B	1p36.22	0.571429	0.0804598	0.00311958	0.038149
								hsa-mir-1273d	1p36.22	0.571429	0.0804598	0.00311958	0.038149
								PGD	1p36.22	0.571429	0.0804598	0.00311958	0.038149
								APITD1-CORT	1p36.22	0.571429	0.0804598	0.00311958	0.038149
								APITD1	1p36.22	0.571429	0.0804598	0.00311958	0.038149
								CORT	1p36.22	0.571429	0.0804598	0.00311958	0.038149
								DFFA	1p36.22	0.571429	0.0804598	0.00311958	0.038149
								PEX14	1p36.22	0.571429	0.0804598	0.00311958	0.038149
								CASZ1	1p36.22	0.571429	0.0804598	0.00311958	0.038149
								C1orf127	1p36.22	0.571429	0.0804598	0.00311958	0.038149
								TARDBP	1p36.22	0.571429	0.0804598	0.00311958	0.038149
								MASP2	1p36.22	0.571429	0.0804598	0.00311958	0.038149
								SRM	1p36.22	0.571429	0.0804598	0.00311958	0.038149
								EXOSC10	1p36.22	0.571429	0.0804598	0.00311958	0.038149
								MTOR	1p36.22	0.571429	0.0804598	0.00311958	0.038149
								ANGPTL7	1p36.22	0.571429	0.0804598	0.00311958	0.038149
								UBIAD1	1p36.22	0.571429	0.0804598	0.00311958	0.038149
								PTCHD2	1p36.22	0.571429	0.0804598	0.00311958	0.038149
								FBXO2	1p36.22	0.571429	0.0804598	0.00311958	0.038149
								FBXO44	1p36.22	0.571429	0.0804598	0.00311958	0.038149
								FBXO6	1p36.22	0.571429	0.0804598	0.00311958	0.038149
								MAD2L2	1p36.22	0.571429	0.0804598	0.00311958	0.038149
								C1orf187	1p36.22	0.571429	0.0804598	0.00311958	0.038149
								AGTRAP	1p36.22	0.571429	0.0804598	0.00311958	0.038149
								MTHFR	1p36.22	0.571429	0.0804598	0.00311958	0.038149
								CLCN6	1p36.22	0.571429	0.0804598	0.00311958	0.038149
								NPPA-AS1	1p36.22	0.571429	0.0804598	0.00311958	0.038149
								NPPA	1p36.22	0.571429	0.0804598	0.00311958	0.038149
								NPPB	1p36.22	0.571429	0.0804598	0.00311958	0.038149
								KIAA2013	1p36.22	0.571429	0.0804598	0.00311958	0.038149
								PLOD1	1p36.22	0.571429	0.0804598	0.00311958	0.038149
								MFN2	1p36.22	0.571429	0.0804598	0.00311958	0.038149
								MIIP	1p36.22	0.571429	0.0804598	0.00311958	0.038149
								TNFRSF8	1p36.22	0.571429	0.0804598	0.00311958	0.038149
								TNFRSF1B	1p36.22	0.571429	0.0804598	0.00311958	0.038149
								MIR4632	1p36.22	0.571429	0.0804598	0.00311958	0.038149
								VPS13D	1p36.22	0.571429	0.0804598	0.00311958	0.038149
								SNORA59A|chr1	1p36.22	0.571429	0.0804598	0.00311958	0.038149
								SNORA59B|chr1	1p36.22	0.571429	0.0804598	0.00311958	0.038149
								DHRS3	1p36.22	0.571429	0.0804598	0.00311958	0.038149
								AADACL4	1p36.21	0.571429	0.0804598	0.00311958	0.038149
								AADACL3	1p36.21	0.571429	0.0804598	0.00311958	0.038149
								C1orf158	1p36.21	0.571429	0.0804598	0.00311958	0.038149
								PRAMEF12	1p36.21	0.571429	0.0804598	0.00311958	0.038149
								PRAMEF1	1p36.21	0.571429	0.0804598	0.00311958	0.038149
								HNRNPCL1	1p36.21	0.571429	0.0804598	0.00311958	0.038149
								LOC649330	1p36.21	0.571429	0.0804598	0.00311958	0.038149
								PRAMEF11	1p36.21	0.571429	0.0804598	0.00311958	0.038149
								PRAMEF10	1p36.21	0.571429	0.0804598	0.00311958	0.038149
								PRAMEF2	1p36.21	0.571429	0.0804598	0.00311958	0.038149
								PRAMEF4	1p36.21	0.571429	0.0804598	0.00311958	0.038149
								PRAMEF6	1p36.21	0.571429	0.0804598	0.00311958	0.038149
								PRAMEF7	1p36.21	0.571429	0.0804598	0.00311958	0.038149
								PRAMEF8	1p36.21	0.571429	0.0804598	0.00311958	0.038149
								PRAMEF22	1p36.21	0.571429	0.0804598	0.00311958	0.038149
								PRAMEF5	1p36.21	0.571429	0.0804598	0.00311958	0.038149
								LOC440563	1p36.21	0.571429	0.0804598	0.00311958	0.038149
								PRAMEF3	1p36.21	0.571429	0.0804598	0.00311958	0.038149
								PRAMEF13	1p36.21	0.571429	0.0804598	0.00311958	0.038149
								PRAMEF14	1p36.21	0.571429	0.0804598	0.00311958	0.038149
								PRAMEF15	1p36.21	0.571429	0.0804598	0.00311958	0.038149
								PRAMEF16	1p36.21	0.571429	0.0804598	0.00311958	0.038149
								PRAMEF17	1p36.21	0.571429	0.0804598	0.00311958	0.038149
								PRAMEF18	1p36.21	0.571429	0.0804598	0.00311958	0.038149
								PRAMEF19	1p36.21	0.571429	0.0804598	0.00311958	0.038149
								PRAMEF20	1p36.21	0.571429	0.0804598	0.00311958	0.038149
								PRAMEF21	1p36.21	0.571429	0.0804598	0.00311958	0.038149
								PRAMEF9	1p36.21	0.571429	0.0804598	0.00311958	0.038149
								LRRC38	1p36.21	0.571429	0.0804598	0.00311958	0.038149
								PDPN	1p36.21	0.571429	0.0804598	0.00311958	0.038149
								PRDM2	1p36.21	0.571429	0.0804598	0.00311958	0.038149
								KAZN	1p36.21	0.571429	0.0804598	0.00311958	0.038149
								C1orf126	1p36.21	0.571429	0.0804598	0.00311958	0.038149
								TMEM51	1p36.21	0.571429	0.0804598	0.00311958	0.038149
								FHAD1	1p36.21	0.571429	0.0804598	0.00311958	0.038149
								EFHD2	1p36.21	0.571429	0.0804598	0.00311958	0.038149
								CTRC	1p36.21	0.571429	0.0804598	0.00311958	0.038149
								CELA2A	1p36.21	0.571429	0.0804598	0.00311958	0.038149
								CELA2B	1p36.21	0.571429	0.0804598	0.00311958	0.038149
								CASP9	1p36.21	0.571429	0.0804598	0.00311958	0.038149
								DNAJC16	1p36.21	0.571429	0.0804598	0.00311958	0.038149
								AGMAT	1p36.21	0.571429	0.0804598	0.00311958	0.038149
								DDI2	1p36.21	0.571429	0.0804598	0.00311958	0.038149
								RSC1A1	1p36.21	0.571429	0.0804598	0.00311958	0.038149
								PLEKHM2	1p36.21	0.571429	0.0804598	0.00311958	0.038149
								SLC25A34	1p36.21	0.571429	0.0804598	0.00311958	0.038149
								TMEM82	1p36.21	0.571429	0.0804598	0.00311958	0.038149
								FBLIM1	1p36.21	0.571429	0.0804598	0.00311958	0.038149
								UQCRHL	1p36.21	0.571429	0.0804598	0.00311958	0.038149
								FLJ37453	1p36.21	0.571429	0.0804598	0.00311958	0.038149
								SPEN	1p36.21	0.571429	0.0804598	0.00311958	0.038149
								ZBTB17	1p36.13	0.571429	0.0804598	0.00311958	0.038149
								C1orf64	1p36.13	0.571429	0.0804598	0.00311958	0.038149
								HSPB7	1p36.13	0.571429	0.0804598	0.00311958	0.038149
								CLCNKA	1p36.13	0.571429	0.0804598	0.00311958	0.038149
								CLCNKB	1p36.13	0.571429	0.0804598	0.00311958	0.038149
								FAM131C	1p36.13	0.571429	0.0804598	0.00311958	0.038149
								EPHA2	1p36.13	0.571429	0.0804598	0.00311958	0.038149
								ARHGEF19	1p36.13	0.571429	0.0804598	0.00311958	0.038149
								RSG1	1p36.13	0.571429	0.0804598	0.00311958	0.038149
								FBXO42	1p36.13	0.571429	0.0804598	0.00311958	0.038149
								C1orf144	1p36.13	0.571429	0.0804598	0.00311958	0.038149
								SPATA21	1p36.13	0.571429	0.0804598	0.00311958	0.038149
								NECAP2	1p36.13	0.571429	0.0804598	0.00311958	0.038149
								CROCCP3	1p36.13	0.571429	0.0804598	0.00311958	0.038149
								CROCCP2	1p36.13	0.571429	0.0804598	0.00311958	0.038149
								MIR3675	1p36.13	0.571429	0.0804598	0.00311958	0.038149
								MST1P2	1p36.13	0.571429	0.0804598	0.00311958	0.038149
								NBPF1	1p36.13	0.571429	0.0804598	0.00311958	0.038149
								ESPNP	1p36.13	0.571429	0.0804598	0.00311958	0.038149
								MST1P9	1p36.13	0.571429	0.0804598	0.00311958	0.038149
								CROCC	1p36.13	0.571429	0.0804598	0.00311958	0.038149
								MFAP2	1p36.13	0.571429	0.0804598	0.00311958	0.038149
								ATP13A2	1p36.13	0.571429	0.0804598	0.00311958	0.038149
								SDHB	1p36.13	0.571429	0.0804598	0.00311958	0.038149
								PADI2	1p36.13	0.571429	0.0804598	0.00311958	0.038149
								PADI1	1p36.13	0.571429	0.0804598	0.00311958	0.038149
								PADI3	1p36.13	0.571429	0.0804598	0.00311958	0.038149
								PADI4	1p36.13	0.571429	0.0804598	0.00311958	0.038149
								PADI6	1p36.13	0.571429	0.0804598	0.00311958	0.038149
								RCC2	1p36.13	0.571429	0.0804598	0.00311958	0.038149
								ARHGEF10L	1p36.13	0.571429	0.0804598	0.00311958	0.038149
								ACTL8	1p36.13	0.571429	0.0804598	0.00311958	0.038149
								IGSF21	1p36.13	0.571429	0.0804598	0.00311958	0.038149
								KLHDC7A	1p36.13	0.571429	0.0804598	0.00311958	0.038149
								PAX7	1p36.13	0.571429	0.0804598	0.00311958	0.038149
								TAS1R2	1p36.13	0.571429	0.0804598	0.00311958	0.038149
								ALDH4A1	1p36.13	0.571429	0.0804598	0.00311958	0.038149
								MIR4695	1p36.13	0.571429	0.0804598	0.00311958	0.038149
								hsa-mir-1290	1p36.13	0.571429	0.0804598	0.00311958	0.038149
								IFFO2	1p36.13	0.571429	0.0804598	0.00311958	0.038149
								UBR4	1p36.13	0.571429	0.0804598	0.00311958	0.038149
								KIAA0090	1p36.13	0.571429	0.0804598	0.00311958	0.038149
								MRTO4	1p36.13	0.571429	0.0804598	0.00311958	0.038149
								AKR7L	1p36.13	0.571429	0.0804598	0.00311958	0.038149
								AKR7A3	1p36.13	0.571429	0.0804598	0.00311958	0.038149
								LOC100506730	1p36.13	0.571429	0.0804598	0.00311958	0.038149
								AKR7A2	1p36.13	0.571429	0.0804598	0.00311958	0.038149
								PQLC2	1p36.13	0.571429	0.0804598	0.00311958	0.038149
								CAPZB	1p36.13	0.571429	0.0804598	0.00311958	0.038149
								C1orf151-NBL1	1p36.13	0.571429	0.0804598	0.00311958	0.038149
								MINOS1	1p36.13	0.571429	0.0804598	0.00311958	0.038149
								NBL1	1p36.13	0.571429	0.0804598	0.00311958	0.038149
								HTR6	1p36.13	0.571429	0.0804598	0.00311958	0.038149
								TMCO4	1p36.13	0.571429	0.0804598	0.00311958	0.038149
								RNF186	1p36.13	0.571429	0.0804598	0.00311958	0.038149
								OTUD3	1p36.13	0.571429	0.0804598	0.00311958	0.038149
								PLA2G2E	1p36.13	0.571429	0.0804598	0.00311958	0.038149
								PLA2G2A	1p36.13	0.571429	0.0804598	0.00311958	0.038149
								PLA2G5	1p36.13	0.571429	0.0804598	0.00311958	0.038149
								PLA2G2D	1p36.12	0.571429	0.0804598	0.00311958	0.038149
								PLA2G2F	1p36.12	0.571429	0.0804598	0.00311958	0.038149
								PLA2G2C	1p36.12	0.571429	0.0804598	0.00311958	0.038149
								UBXN10	1p36.12	0.571429	0.0804598	0.00311958	0.038149
								VWA5B1	1p36.12	0.571429	0.0804598	0.00311958	0.038149
								LOC339505	1p36.12	0.571429	0.0804598	0.00311958	0.038149
								CAMK2N1	1p36.12	0.571429	0.0804598	0.00311958	0.038149
								MUL1	1p36.12	0.571429	0.0804598	0.00311958	0.038149
								FAM43B	1p36.12	0.571429	0.0804598	0.00311958	0.038149
								CDA	1p36.12	0.571429	0.0804598	0.00311958	0.038149
								PINK1	1p36.12	0.571429	0.0804598	0.00311958	0.038149
								DDOST	1p36.12	0.571429	0.0804598	0.00311958	0.038149
								KIF17	1p36.12	0.571429	0.0804598	0.00311958	0.038149
								SH2D5	1p36.12	0.571429	0.0804598	0.00311958	0.038149
								HP1BP3	1p36.12	0.571429	0.0804598	0.00311958	0.038149
								EIF4G3	1p36.12	0.571429	0.0804598	0.00311958	0.038149
								hsa-mir-1256	1p36.12	0.571429	0.0804598	0.00311958	0.038149
								ECE1	1p36.12	0.571429	0.0804598	0.00311958	0.038149
								LOC100506801	1p36.12	0.571429	0.0804598	0.00311958	0.038149
								NBPF3	1p36.12	0.571429	0.0804598	0.00311958	0.038149
								ALPL	1p36.12	0.571429	0.0804598	0.00311958	0.038149
								RAP1GAP	1p36.12	0.571429	0.0804598	0.00311958	0.038149
								USP48	1p36.12	0.571429	0.0804598	0.00311958	0.038149
								LDLRAD2	1p36.12	0.571429	0.0804598	0.00311958	0.038149
								HSPG2	1p36.12	0.571429	0.0804598	0.00311958	0.038149
								CELA3B	1p36.12	0.571429	0.0804598	0.00311958	0.038149
								CELA3A	1p36.12	0.571429	0.0804598	0.00311958	0.038149
								LINC00339	1p36.12	0.571429	0.0804598	0.00311958	0.038149
								CDC42	1p36.12	0.571429	0.0804598	0.00311958	0.038149
								WNT4	1p36.12	0.571429	0.0804598	0.00311958	0.038149
								ZBTB40	1p36.12	0.571429	0.0804598	0.00311958	0.038149
								EPHA8	1p36.12	0.571429	0.0804598	0.00311958	0.038149
								C1QA	1p36.12	0.571429	0.0804598	0.00311958	0.038149
								C1QC	1p36.12	0.571429	0.0804598	0.00311958	0.038149
								C1QB	1p36.12	0.571429	0.0804598	0.00311958	0.038149
								EPHB2	1p36.12	0.571429	0.0804598	0.00311958	0.038149
								MIR4684	1p36.12	0.571429	0.0804598	0.00311958	0.038149
								MIR4253	1p36.12	0.571429	0.0804598	0.00311958	0.038149
								hsa-mir-4253	1p36.12	0.571429	0.0804598	0.00311958	0.038149
								LOC729059	1p36.12	0.571429	0.0804598	0.00311958	0.038149
								KDM1A	1p36.12	0.571429	0.0804598	0.00311958	0.038149
								MIR3115	1p36.12	0.571429	0.0804598	0.00311958	0.038149
								hsa-mir-3115	1p36.12	0.571429	0.0804598	0.00311958	0.038149
								LUZP1	1p36.12	0.571429	0.0804598	0.00311958	0.038149
								HTR1D	1p36.12	0.571429	0.0804598	0.00311958	0.038149
								HNRNPR	1p36.12	0.571429	0.0804598	0.00311958	0.038149
								ZNF436	1p36.12	0.571429	0.0804598	0.00311958	0.038149
								C1orf213	1p36.12	0.571429	0.0804598	0.00311958	0.038149
								TCEA3	1p36.12	0.571429	0.0804598	0.00311958	0.038149
								ASAP3	1p36.12	0.571429	0.0804598	0.00311958	0.038149
								E2F2	1p36.12	0.571429	0.0804598	0.00311958	0.038149
								ID3	1p36.12	0.571429	0.0804598	0.00311958	0.038149
								MDS2	1p36.11	0.571429	0.0804598	0.00311958	0.038149
								RPL11	1p36.11	0.571429	0.0804598	0.00311958	0.038149
								TCEB3	1p36.11	0.571429	0.0804598	0.00311958	0.038149
								LOC100506963	1p36.11	0.571429	0.0804598	0.00311958	0.038149
								PITHD1	1p36.11	0.571429	0.0804598	0.00311958	0.038149
								GALE	1p36.11	0.571429	0.0804598	0.00311958	0.038149
								HMGCL	1p36.11	0.571429	0.0804598	0.00311958	0.038149
								LYPLA2	1p36.11	0.571429	0.0804598	0.00311958	0.038149
								FUCA1	1p36.11	0.571429	0.0804598	0.00311958	0.038149
								CNR2	1p36.11	0.571429	0.0804598	0.00311958	0.038149
								MIR378F	1p36.11	0.571429	0.0804598	0.00311958	0.038149
								PNRC2	1p36.11	0.571429	0.0804598	0.00311958	0.038149
								SRSF10	1p36.11	0.571429	0.0804598	0.00311958	0.038149
								MYOM3	1p36.11	0.571429	0.0804598	0.00311958	0.038149
								IL22RA1	1p36.11	0.571429	0.0804598	0.00311958	0.038149
								IL28RA	1p36.11	0.571429	0.0804598	0.00311958	0.038149
								LOC284632	1p36.11	0.571429	0.0804598	0.00311958	0.038149
								GRHL3	1p36.11	0.571429	0.0804598	0.00311958	0.038149
								C1orf201	1p36.11	0.571429	0.0804598	0.00311958	0.038149
								NIPAL3	1p36.11	0.571429	0.0804598	0.00311958	0.038149
								RCAN3AS	1p36.11	0.571429	0.0804598	0.00311958	0.038149
								RCAN3	1p36.11	0.571429	0.0804598	0.00311958	0.038149
								C1orf130	1p36.11	0.571429	0.0804598	0.00311958	0.038149
								SRRM1	1p36.11	0.571429	0.0804598	0.00311958	0.038149
								CLIC4	1p36.11	0.571429	0.0804598	0.00311958	0.038149
								RUNX3	1p36.11	0.571429	0.0804598	0.00311958	0.038149
								SYF2	1p36.11	0.571429	0.0804598	0.00311958	0.038149
								C1orf63	1p36.11	0.571429	0.0804598	0.00311958	0.038149
								RHD	1p36.11	0.571429	0.0804598	0.00311958	0.038149
								TMEM50A	1p36.11	0.571429	0.0804598	0.00311958	0.038149
								RHCE	1p36.11	0.571429	0.0804598	0.00311958	0.038149
								TMEM57	1p36.11	0.571429	0.0804598	0.00311958	0.038149
								LDLRAP1	1p36.11	0.571429	0.0804598	0.00311958	0.038149
								MAN1C1	1p36.11	0.571429	0.0804598	0.00311958	0.038149
								SEPN1	1p36.11	0.571429	0.0804598	0.00311958	0.038149
								FAM54B	1p36.11	0.571429	0.0804598	0.00311958	0.038149
								LOC646471	1p36.11	0.571429	0.0804598	0.00311958	0.038149
								C1orf135	1p36.11	0.571429	0.0804598	0.00311958	0.038149
								PAQR7	1p36.11	0.571429	0.0804598	0.00311958	0.038149
								STMN1	1p36.11	0.571429	0.0804598	0.00311958	0.038149
								MIR3917	1p36.11	0.571429	0.0804598	0.00311958	0.038149
								PAFAH2	1p36.11	0.571429	0.0804598	0.00311958	0.038149
								EXTL1	1p36.11	0.571429	0.0804598	0.00311958	0.038149
								SLC30A2	1p36.11	0.571429	0.0804598	0.00311958	0.038149
								TRIM63	1p36.11	0.571429	0.0804598	0.00311958	0.038149
								PDIK1L	1p36.11	0.571429	0.0804598	0.00311958	0.038149
								FAM110D	1p36.11	0.571429	0.0804598	0.00311958	0.038149
								ZNF593	1p36.11	0.571429	0.0804598	0.00311958	0.038149
								CNKSR1	1p36.11	0.571429	0.0804598	0.00311958	0.038149
								CATSPER4	1p36.11	0.571429	0.0804598	0.00311958	0.038149
								CEP85	1p36.11	0.571429	0.0804598	0.00311958	0.038149
								SH3BGRL3	1p36.11	0.571429	0.0804598	0.00311958	0.038149
								UBXN11	1p36.11	0.571429	0.0804598	0.00311958	0.038149
								CD52	1p36.11	0.571429	0.0804598	0.00311958	0.038149
								AIM1L	1p36.11	0.571429	0.0804598	0.00311958	0.038149
								ZNF683	1p36.11	0.571429	0.0804598	0.00311958	0.038149
								LIN28A	1p36.11	0.571429	0.0804598	0.00311958	0.038149
								DHDDS	1p36.11	0.571429	0.0804598	0.00311958	0.038149
								HMGN2	1p36.11	0.571429	0.0804598	0.00311958	0.038149
								RPS6KA1	1p36.11	0.571429	0.0804598	0.00311958	0.038149
								MIR1976	1p36.11	0.571429	0.0804598	0.00311958	0.038149
								hsa-mir-1976	1p36.11	0.571429	0.0804598	0.00311958	0.038149
								ARID1A	1p36.11	0.571429	0.0804598	0.00311958	0.038149
								PIGV	1p36.11	0.571429	0.0804598	0.00311958	0.038149
								ZDHHC18	1p36.11	0.571429	0.0804598	0.00311958	0.038149
								SFN	1p36.11	0.571429	0.0804598	0.00311958	0.038149
								GPN2	1p36.11	0.571429	0.0804598	0.00311958	0.038149
								GPATCH3	1p36.11	0.571429	0.0804598	0.00311958	0.038149
								NR0B2	1p36.11	0.571429	0.0804598	0.00311958	0.038149
								NUDC	1p36.11	0.571429	0.0804598	0.00311958	0.038149
								C1orf172	1p36.11	0.571429	0.0804598	0.00311958	0.038149
								TRNP1	1p36.11	0.571429	0.0804598	0.00311958	0.038149
								FAM46B	1p36.11	0.571429	0.0804598	0.00311958	0.038149
								SLC9A1	1p36.11	0.571429	0.0804598	0.00311958	0.038149
								WDTC1	1p36.11	0.571429	0.0804598	0.00311958	0.038149
								LOC644961	1p36.11	0.571429	0.0804598	0.00311958	0.038149
								TMEM222	1p36.11	0.571429	0.0804598	0.00311958	0.038149
								SYTL1	1p36.11	0.571429	0.0804598	0.00311958	0.038149
								MAP3K6	1p36.11	0.571429	0.0804598	0.00311958	0.038149
								FCN3	1p36.11	0.571429	0.0804598	0.00311958	0.038149
								CD164L2	1p36.11	0.571429	0.0804598	0.00311958	0.038149
								GPR3	1p36.11	0.571429	0.0804598	0.00311958	0.038149
								WASF2	1p36.11	0.571429	0.0804598	0.00311958	0.038149
								AHDC1	1p36.11	0.571429	0.0804598	0.00311958	0.038149
								FGR	1p36.11	0.571429	0.0804598	0.00311958	0.038149
								IFI6	1p36.11	0.571429	0.0804598	0.00311958	0.038149
								FAM76A	1p35.3	0.571429	0.0804598	0.00311958	0.038149
								STX12	1p35.3	0.571429	0.0804598	0.00311958	0.038149
								PPP1R8	1p35.3	0.571429	0.0804598	0.00311958	0.038149
								SCARNA1	1p35.3	0.571429	0.0804598	0.00311958	0.038149
								C1orf38	1p35.3	0.571429	0.0804598	0.00311958	0.038149
								RPA2	1p35.3	0.571429	0.0804598	0.00311958	0.038149
								SMPDL3B	1p35.3	0.571429	0.0804598	0.00311958	0.038149
								XKR8	1p35.3	0.571429	0.0804598	0.00311958	0.038149
								EYA3	1p35.3	0.571429	0.0804598	0.00311958	0.038149
								LOC653566	1p35.3	0.571429	0.0804598	0.00311958	0.038149
								PTAFR	1p35.3	0.571429	0.0804598	0.00311958	0.038149
								DNAJC8	1p35.3	0.571429	0.0804598	0.00311958	0.038149
								ATPIF1	1p35.3	0.571429	0.0804598	0.00311958	0.038149
								SESN2	1p35.3	0.571429	0.0804598	0.00311958	0.038149
								MED18	1p35.3	0.571429	0.0804598	0.00311958	0.038149
								PHACTR4	1p35.3	0.571429	0.0804598	0.00311958	0.038149
								RCC1	1p35.3	0.571429	0.0804598	0.00311958	0.038149
								SNHG3	1p35.3	0.571429	0.0804598	0.00311958	0.038149
								TRNAU1AP	1p35.3	0.571429	0.0804598	0.00311958	0.038149
								SNHG12	1p35.3	0.571429	0.0804598	0.00311958	0.038149
								SNORA16A	1p35.3	0.571429	0.0804598	0.00311958	0.038149
								SNORA44	1p35.3	0.571429	0.0804598	0.00311958	0.038149
								SNORA61	1p35.3	0.571429	0.0804598	0.00311958	0.038149
								SNORD99	1p35.3	0.571429	0.0804598	0.00311958	0.038149
								RAB42	1p35.3	0.571429	0.0804598	0.00311958	0.038149
								TAF12	1p35.3	0.571429	0.0804598	0.00311958	0.038149
								RNU11	1p35.3	0.571429	0.0804598	0.00311958	0.038149
								GMEB1	1p35.3	0.571429	0.0804598	0.00311958	0.038149
								YTHDF2	1p35.3	0.571429	0.0804598	0.00311958	0.038149
								OPRD1	1p35.3	0.571429	0.0804598	0.00311958	0.038149
								EPB41	1p35.3	0.571429	0.0804598	0.00311958	0.038149
								TMEM200B	1p35.3	0.571429	0.0804598	0.00311958	0.038149
								SRSF4	1p35.3	0.571429	0.0804598	0.00311958	0.038149
								MECR	1p35.3	0.571429	0.0804598	0.00311958	0.038149
								PTPRU	1p35.3	0.571429	0.0804598	0.00311958	0.038149
								MATN1	1p35.2	0.571429	0.091954	0.00454715	0.0485807
								LOC100129196	1p35.2	0.571429	0.091954	0.00454715	0.0485807
								LAPTM5	1p35.2	0.571429	0.091954	0.00454715	0.0485807
								MIR4420	1p35.2	0.571429	0.091954	0.00454715	0.0485807
								SDC3	1p35.2	0.571429	0.091954	0.00454715	0.0485807
								PUM1	1p35.2	0.571429	0.091954	0.00454715	0.0485807
								SNORD103A	1p35.2	0.571429	0.091954	0.00454715	0.0485807
								SNORD103B	1p35.2	0.571429	0.091954	0.00454715	0.0485807
								PRO0611	1p35.2	0.571429	0.091954	0.00454715	0.0485807
								SNORD85	1p35.2	0.571429	0.091954	0.00454715	0.0485807
								NKAIN1	1p35.2	0.571429	0.091954	0.00454715	0.0485807
								SNRNP40	1p35.2	0.571429	0.091954	0.00454715	0.0485807
								ZCCHC17	1p35.2	0.571429	0.091954	0.00454715	0.0485807
								FABP3	1p35.2	0.571429	0.091954	0.00454715	0.0485807
								SERINC2	1p35.2	0.571429	0.091954	0.00454715	0.0485807
								LOC149086	1p35.2	0.571429	0.091954	0.00454715	0.0485807
								LOC284551	1p35.2	0.571429	0.091954	0.00454715	0.0485807
								TINAGL1	1p35.2	0.571429	0.091954	0.00454715	0.0485807
								HCRTR1	1p35.2	0.571429	0.091954	0.00454715	0.0485807
								PEF1	1p35.2	0.571429	0.091954	0.00454715	0.0485807
								COL16A1	1p35.2	0.571429	0.091954	0.00454715	0.0485807
								BAI2	1p35.2	0.571429	0.091954	0.00454715	0.0485807
								MIR4254	1p35.2	0.571429	0.091954	0.00454715	0.0485807
								hsa-mir-4254	1p35.2	0.571429	0.091954	0.00454715	0.0485807
								SPOCD1	1p35.2	0.571429	0.091954	0.00454715	0.0485807
								PTP4A2	1p35.2	0.571429	0.091954	0.00454715	0.0485807
								KHDRBS1	1p35.1	0.571429	0.091954	0.00454715	0.0485807
								TMEM39B	1p35.1	0.571429	0.091954	0.00454715	0.0485807
								KPNA6	1p35.1	0.571429	0.091954	0.00454715	0.0485807
								TXLNA	1p35.1	0.571429	0.091954	0.00454715	0.0485807
								CCDC28B	1p35.1	0.571429	0.091954	0.00454715	0.0485807
								IQCC	1p35.1	0.571429	0.091954	0.00454715	0.0485807
								DCDC2B	1p35.1	0.571429	0.091954	0.00454715	0.0485807
								TMEM234	1p35.1	0.571429	0.091954	0.00454715	0.0485807
								EIF3I	1p35.1	0.571429	0.091954	0.00454715	0.0485807
								MTMR9LP	1p35.1	0.571429	0.091954	0.00454715	0.0485807
								FAM167B	1p35.1	0.571429	0.091954	0.00454715	0.0485807
								LCK	1p35.1	0.571429	0.091954	0.00454715	0.0485807
								HDAC1	1p35.1	0.571429	0.091954	0.00454715	0.0485807
								MARCKSL1	1p35.1	0.571429	0.091954	0.00454715	0.0485807
								LOC100128071	1p35.1	0.571429	0.091954	0.00454715	0.0485807
								TSSK3	1p35.1	0.571429	0.091954	0.00454715	0.0485807
								BSDC1	1p35.1	0.571429	0.091954	0.00454715	0.0485807
								ZBTB8B	1p35.1	0.571429	0.091954	0.00454715	0.0485807
								ZBTB8A	1p35.1	0.571429	0.091954	0.00454715	0.0485807
								ZBTB8OS	1p35.1	0.571429	0.091954	0.00454715	0.0485807
								RBBP4	1p35.1	0.571429	0.091954	0.00454715	0.0485807
								SYNC	1p35.1	0.571429	0.091954	0.00454715	0.0485807
								KIAA1522	1p35.1	0.571429	0.091954	0.00454715	0.0485807
								YARS	1p35.1	0.571429	0.091954	0.00454715	0.0485807
								S100PBP	1p35.1	0.571429	0.091954	0.00454715	0.0485807
								FNDC5	1p35.1	0.571429	0.091954	0.00454715	0.0485807
								HPCA	1p35.1	0.571429	0.091954	0.00454715	0.0485807
								TMEM54	1p35.1	0.571429	0.091954	0.00454715	0.0485807
								RNF19B	1p35.1	0.571429	0.091954	0.00454715	0.0485807
								AK2	1p35.1	0.571429	0.091954	0.00454715	0.0485807
								ADC	1p35.1	0.571429	0.091954	0.00454715	0.0485807
								TRIM62	1p35.1	0.571429	0.091954	0.00454715	0.0485807
								ZNF362	1p35.1	0.571429	0.091954	0.00454715	0.0485807
								PHC2	1p35.1	0.571429	0.091954	0.00454715	0.0485807
								MIR3605	1p35.1	0.571429	0.091954	0.00454715	0.0485807
								ZSCAN20	1p35.1	0.571429	0.091954	0.00454715	0.0485807
								CSMD2	1p35.1	0.571429	0.091954	0.00454715	0.0485807
								HMGB4	1p35.1	0.571429	0.091954	0.00454715	0.0485807
								LOC402779	1p35.1	0.571429	0.091954	0.00454715	0.0485807
								C1orf94	1p34.3	0.571429	0.091954	0.00454715	0.0485807
								hsa-mir-552	1p34.3	0.571429	0.091954	0.00454715	0.0485807
								GJB5	1p34.3	0.571429	0.091954	0.00454715	0.0485807
								GJB4	1p34.3	0.571429	0.091954	0.00454715	0.0485807
								GJB3	1p34.3	0.571429	0.091954	0.00454715	0.0485807
								GJA4	1p34.3	0.571429	0.091954	0.00454715	0.0485807
								C1orf212	1p34.3	0.571429	0.091954	0.00454715	0.0485807
								DLGAP3	1p34.3	0.571429	0.091954	0.00454715	0.0485807
								LOC653160	1p34.3	0.571429	0.091954	0.00454715	0.0485807
								ZMYM6NB	1p34.3	0.571429	0.091954	0.00454715	0.0485807
								ZMYM6	1p34.3	0.571429	0.091954	0.00454715	0.0485807
								ZMYM1	1p34.3	0.571429	0.091954	0.00454715	0.0485807
								SFPQ	1p34.3	0.571429	0.091954	0.00454715	0.0485807
								ZMYM4	1p34.3	0.571429	0.091954	0.00454715	0.0485807
								KIAA0319L	1p34.3	0.571429	0.091954	0.00454715	0.0485807
								NCDN	1p34.3	0.571429	0.091954	0.00454715	0.0485807
								TFAP2E	1p34.3	0.571429	0.091954	0.00454715	0.0485807
								PSMB2	1p34.3	0.571429	0.091954	0.00454715	0.0485807
								C1orf216	1p34.3	0.571429	0.091954	0.00454715	0.0485807
								CLSPN	1p34.3	0.571429	0.091954	0.00454715	0.0485807
								EIF2C4	1p34.3	0.571429	0.091954	0.00454715	0.0485807
								EIF2C1	1p34.3	0.571429	0.091954	0.00454715	0.0485807
								EIF2C3	1p34.3	0.571429	0.091954	0.00454715	0.0485807
								TEKT2	1p34.3	0.571429	0.091954	0.00454715	0.0485807
								ADPRHL2	1p34.3	0.571429	0.091954	0.00454715	0.0485807
								COL8A2	1p34.3	0.571429	0.091954	0.00454715	0.0485807
								TRAPPC3	1p34.3	0.571429	0.091954	0.00454715	0.0485807
								MAP7D1	1p34.3	0.571429	0.091954	0.00454715	0.0485807
								THRAP3	1p34.3	0.571429	0.091954	0.00454715	0.0485807
								SH3D21	1p34.3	0.571429	0.091954	0.00454715	0.0485807
								FAM176B	1p34.3	0.571429	0.091954	0.00454715	0.0485807
								STK40	1p34.3	0.571429	0.091954	0.00454715	0.0485807
								LSM10	1p34.3	0.571429	0.091954	0.00454715	0.0485807
								OSCP1	1p34.3	0.571429	0.091954	0.00454715	0.0485807
								MRPS15	1p34.3	0.571429	0.091954	0.00454715	0.0485807
								CSF3R	1p34.3	0.571429	0.091954	0.00454715	0.0485807
								GRIK3	1p34.3	0.571429	0.091954	0.00454715	0.0485807
								MIR4255	1p34.3	0.571429	0.091954	0.00454715	0.0485807
								hsa-mir-4255	1p34.3	0.571429	0.091954	0.00454715	0.0485807
								LOC728431	1p34.3	0.571429	0.091954	0.00454715	0.0485807
								ZC3H12A	1p34.3	0.571429	0.091954	0.00454715	0.0485807
								MEAF6	1p34.3	0.571429	0.091954	0.00454715	0.0485807
								SNIP1	1p34.3	0.571429	0.091954	0.00454715	0.0485807
								DNALI1	1p34.3	0.571429	0.091954	0.00454715	0.0485807
								GNL2	1p34.3	0.571429	0.091954	0.00454715	0.0485807
								RSPO1	1p34.3	0.571429	0.091954	0.00454715	0.0485807
								C1orf109	1p34.3	0.571429	0.091954	0.00454715	0.0485807
								CDCA8	1p34.3	0.571429	0.091954	0.00454715	0.0485807
								EPHA10	1p34.3	0.571429	0.091954	0.00454715	0.0485807
								MANEAL	1p34.3	0.571429	0.091954	0.00454715	0.0485807
								YRDC	1p34.3	0.571429	0.091954	0.00454715	0.0485807
								C1orf122	1p34.3	0.571429	0.091954	0.00454715	0.0485807
								MTF1	1p34.3	0.571429	0.091954	0.00454715	0.0485807
								INPP5B	1p34.3	0.571429	0.091954	0.00454715	0.0485807
								SF3A3	1p34.3	0.571429	0.091954	0.00454715	0.0485807
								FHL3	1p34.3	0.571429	0.091954	0.00454715	0.0485807
								UTP11L	1p34.3	0.571429	0.091954	0.00454715	0.0485807
								POU3F1	1p34.3	0.571429	0.091954	0.00454715	0.0485807
								MIR3659	1p34.3	0.571429	0.091954	0.00454715	0.0485807
								LOC339442	1p34.3	0.571429	0.103448	0.00638093	0.0603572
								RRAGC	1p34.3	0.571429	0.103448	0.00638093	0.0603572
								GJA9-MYCBP	1p34.3	0.571429	0.103448	0.00638093	0.0603572
								MYCBP	1p34.3	0.571429	0.103448	0.00638093	0.0603572
								GJA9	1p34.3	0.571429	0.103448	0.00638093	0.0603572
								RHBDL2	1p34.3	0.571429	0.103448	0.00638093	0.0603572
								AKIRIN1	1p34.3	0.571429	0.103448	0.00638093	0.0603572
								NDUFS5	1p34.3	0.571429	0.103448	0.00638093	0.0603572
								MACF1	1p34.3	0.571429	0.103448	0.00638093	0.0603572
								KIAA0754	1p34.3	0.571429	0.103448	0.00638093	0.0603572
								BMP8A	1p34.3	0.571429	0.103448	0.00638093	0.0603572
								PPIEL	1p34.3	0.571429	0.103448	0.00638093	0.0603572
								PABPC4	1p34.3	0.571429	0.103448	0.00638093	0.0603572
								SNORA55	1p34.3	0.571429	0.103448	0.00638093	0.0603572
								HEYL	1p34.3	0.571429	0.103448	0.00638093	0.0603572
								NT5C1A	1p34.2	0.571429	0.103448	0.00638093	0.0603572
								HPCAL4	1p34.2	0.571429	0.103448	0.00638093	0.0603572
								PPIE	1p34.2	0.571429	0.103448	0.00638093	0.0603572
								BMP8B	1p34.2	0.571429	0.103448	0.00638093	0.0603572
								OXCT2	1p34.2	0.571429	0.103448	0.00638093	0.0603572
								TRIT1	1p34.2	0.571429	0.103448	0.00638093	0.0603572
								MYCL1	1p34.2	0.571429	0.103448	0.00638093	0.0603572
								MFSD2A	1p34.2	0.571429	0.103448	0.00638093	0.0603572
								CAP1	1p34.2	0.571429	0.103448	0.00638093	0.0603572
								PPT1	1p34.2	0.571429	0.103448	0.00638093	0.0603572
								RLF	1p34.2	0.571429	0.103448	0.00638093	0.0603572
								TMCO2	1p34.2	0.571429	0.103448	0.00638093	0.0603572
								ZMPSTE24	1p34.2	0.571429	0.103448	0.00638093	0.0603572
								COL9A2	1p34.2	0.571429	0.103448	0.00638093	0.0603572
								SMAP2	1p34.2	0.571429	0.103448	0.00638093	0.0603572
								ZNF643	1p34.2	0.571429	0.103448	0.00638093	0.0603572
								ZNF642	1p34.2	0.571429	0.103448	0.00638093	0.0603572
								DEM1	1p34.2	0.571429	0.103448	0.00638093	0.0603572
								ZNF684	1p34.2	0.571429	0.103448	0.00638093	0.0603572
								RIMS3	1p34.2	0.571429	0.103448	0.00638093	0.0603572
								LOC100130557	1p34.2	0.571429	0.103448	0.00638093	0.0603572
								NFYC	1p34.2	0.571429	0.103448	0.00638093	0.0603572
								MIR30C1	1p34.2	0.571429	0.103448	0.00638093	0.0603572
								MIR30E	1p34.2	0.571429	0.103448	0.00638093	0.0603572
								hsa-mir-30c-1	1p34.2	0.571429	0.103448	0.00638093	0.0603572
								hsa-mir-30e	1p34.2	0.571429	0.103448	0.00638093	0.0603572
								KCNQ4	1p34.2	0.571429	0.103448	0.00638093	0.0603572
								CITED4	1p34.2	0.571429	0.103448	0.00638093	0.0603572
								CTPS	1p34.2	0.571429	0.103448	0.00638093	0.0603572
								LOC100507178	1p34.2	0.571429	0.103448	0.00638093	0.0603572
								SLFNL1	1p34.2	0.571429	0.103448	0.00638093	0.0603572
								SCMH1	1p34.2	0.571429	0.103448	0.00638093	0.0603572
								EDN2	1p34.2	0.571429	0.103448	0.00638093	0.0603572
								HIVEP3	1p34.2	0.571429	0.103448	0.00638093	0.0603572
								GUCA2B	1p34.2	0.571429	0.103448	0.00638093	0.0603572
								GUCA2A	1p34.2	0.571429	0.103448	0.00638093	0.0603572
								FOXJ3	1p34.2	0.571429	0.103448	0.00638093	0.0603572
								RIMKLA	1p34.2	0.571429	0.103448	0.00638093	0.0603572
								ZMYND12	1p34.2	0.571429	0.103448	0.00638093	0.0603572
								PPCS	1p34.2	0.571429	0.103448	0.00638093	0.0603572
								CCDC30	1p34.2	0.571429	0.103448	0.00638093	0.0603572
								PPIH	1p34.2	0.571429	0.103448	0.00638093	0.0603572
								YBX1	1p34.2	0.571429	0.103448	0.00638093	0.0603572
								CLDN19	1p34.2	0.571429	0.103448	0.00638093	0.0603572
								LEPRE1	1p34.2	0.571429	0.103448	0.00638093	0.0603572
								C1orf50	1p34.2	0.571429	0.103448	0.00638093	0.0603572
								LOC100129924	1p34.2	0.571429	0.103448	0.00638093	0.0603572
								CCDC23	1p34.2	0.571429	0.103448	0.00638093	0.0603572
								ERMAP	1p34.2	0.571429	0.103448	0.00638093	0.0603572
								ZNF691	1p34.2	0.571429	0.103448	0.00638093	0.0603572
								SLC2A1	1p34.2	0.571429	0.103448	0.00638093	0.0603572
								FLJ32224	1p34.2	0.571429	0.103448	0.00638093	0.0603572
								FAM183A	1p34.2	0.571429	0.103448	0.00638093	0.0603572
								EBNA1BP2	1p34.2	0.571429	0.103448	0.00638093	0.0603572
								WDR65	1p34.2	0.571429	0.103448	0.00638093	0.0603572
								TMEM125	1p34.2	0.571429	0.103448	0.00638093	0.0603572
								C1orf210	1p34.2	0.571429	0.103448	0.00638093	0.0603572
								TIE1	1p34.2	0.571429	0.103448	0.00638093	0.0603572
								MPL	1p34.2	0.571429	0.103448	0.00638093	0.0603572
								CDC20	1p34.2	0.571429	0.103448	0.00638093	0.0603572
								ELOVL1	1p34.2	0.571429	0.103448	0.00638093	0.0603572
								MED8	1p34.2	0.571429	0.103448	0.00638093	0.0603572
								SZT2	1p34.2	0.571429	0.103448	0.00638093	0.0603572
								HYI	1p34.2	0.571429	0.103448	0.00638093	0.0603572
								PTPRF	1p34.2	0.571429	0.103448	0.00638093	0.0603572
								KDM4A	1p34.1	0.571429	0.103448	0.00638093	0.0603572
								LOC100132774	1p34.1	0.571429	0.103448	0.00638093	0.0603572
								ST3GAL3	1p34.1	0.571429	0.103448	0.00638093	0.0603572
								ARTN	1p34.1	0.571429	0.103448	0.00638093	0.0603572
								IPO13	1p34.1	0.571429	0.103448	0.00638093	0.0603572
								DPH2	1p34.1	0.571429	0.103448	0.00638093	0.0603572
								ATP6V0B	1p34.1	0.571429	0.103448	0.00638093	0.0603572
								B4GALT2	1p34.1	0.571429	0.103448	0.00638093	0.0603572
								CCDC24	1p34.1	0.571429	0.103448	0.00638093	0.0603572
								SLC6A9	1p34.1	0.571429	0.103448	0.00638093	0.0603572
								KLF17	1p34.1	0.571429	0.103448	0.00638093	0.0603572
								DMAP1	1p34.1	0.571429	0.103448	0.00638093	0.0603572
								ERI3	1p34.1	0.571429	0.103448	0.00638093	0.0603572
								RNF220	1p34.1	0.571429	0.103448	0.00638093	0.0603572
								TMEM53	1p34.1	0.571429	0.103448	0.00638093	0.0603572
								C1orf228	1p34.1	0.571429	0.103448	0.00638093	0.0603572
								KIF2C	1p34.1	0.571429	0.103448	0.00638093	0.0603572
								RPS8	1p34.1	0.571429	0.103448	0.00638093	0.0603572
								SNORD38A	1p34.1	0.571429	0.103448	0.00638093	0.0603572
								SNORD38B	1p34.1	0.571429	0.103448	0.00638093	0.0603572
								SNORD46	1p34.1	0.571429	0.103448	0.00638093	0.0603572
								SNORD55	1p34.1	0.571429	0.103448	0.00638093	0.0603572
								BEST4	1p34.1	0.571429	0.103448	0.00638093	0.0603572
								PLK3	1p34.1	0.571429	0.103448	0.00638093	0.0603572
								BTBD19	1p34.1	0.571429	0.103448	0.00638093	0.0603572
								TCTEX1D4	1p34.1	0.571429	0.103448	0.00638093	0.0603572
								PTCH2	1p34.1	0.571429	0.103448	0.00638093	0.0603572
								EIF2B3	1p34.1	0.571429	0.103448	0.00638093	0.0603572
								HECTD3	1p34.1	0.571429	0.103448	0.00638093	0.0603572
								UROD	1p34.1	0.571429	0.103448	0.00638093	0.0603572
								ZSWIM5	1p34.1	0.571429	0.103448	0.00638093	0.0603572
								LOC400752	1p34.1	0.571429	0.103448	0.00638093	0.0603572
								HPDL	1p34.1	0.571429	0.103448	0.00638093	0.0603572
								MUTYH	1p34.1	0.571429	0.103448	0.00638093	0.0603572
								TOE1	1p34.1	0.571429	0.103448	0.00638093	0.0603572
								TESK2	1p34.1	0.571429	0.103448	0.00638093	0.0603572
								CCDC163P	1p34.1	0.571429	0.103448	0.00638093	0.0603572
								MMACHC	1p34.1	0.571429	0.103448	0.00638093	0.0603572
								PRDX1	1p34.1	0.571429	0.103448	0.00638093	0.0603572
								AKR1A1	1p34.1	0.571429	0.103448	0.00638093	0.0603572
								NASP	1p34.1	0.571429	0.103448	0.00638093	0.0603572
								CCDC17	1p34.1	0.571429	0.103448	0.00638093	0.0603572
								GPBP1L1	1p34.1	0.571429	0.103448	0.00638093	0.0603572
								RPS15AP10	1p34.1	0.571429	0.103448	0.00638093	0.0603572
								TMEM69	1p34.1	0.571429	0.103448	0.00638093	0.0603572
								IPP	1p34.1	0.571429	0.103448	0.00638093	0.0603572
								MAST2	1p34.1	0.571429	0.103448	0.00638093	0.0603572
								PIK3R3	1p34.1	0.571429	0.103448	0.00638093	0.0603572
								TSPAN1	1p34.1	0.571429	0.103448	0.00638093	0.0603572
								POMGNT1	1p34.1	0.571429	0.103448	0.00638093	0.0603572
								LURAP1	1p34.1	0.571429	0.103448	0.00638093	0.0603572
								RAD54L	1p34.1	0.571429	0.103448	0.00638093	0.0603572
								LRRC41	1p34.1	0.571429	0.103448	0.00638093	0.0603572
								UQCRH	1p34.1	0.571429	0.103448	0.00638093	0.0603572
								NSUN4	1p33	0.571429	0.103448	0.00638093	0.0603572
								FAAH	1p33	0.571429	0.103448	0.00638093	0.0603572
								LOC729041	1p33	0.571429	0.103448	0.00638093	0.0603572
								DMBX1	1p33	0.571429	0.103448	0.00638093	0.0603572
								LOC100507423	1p33	0.571429	0.103448	0.00638093	0.0603572
								KNCN	1p33	0.571429	0.103448	0.00638093	0.0603572
								MKNK1	1p33	0.571429	0.103448	0.00638093	0.0603572
								MOB3C	1p33	0.571429	0.103448	0.00638093	0.0603572
								FAM110C	2p25.3	0.714286	0.114943	0.000943161	0.0184395
								SH3YL1	2p25.3	0.714286	0.114943	0.000943161	0.0184395
								ACP1	2p25.3	0.714286	0.114943	0.000943161	0.0184395
								FAM150B	2p25.3	0.714286	0.114943	0.000943161	0.0184395
								TMEM18	2p25.3	0.714286	0.114943	0.000943161	0.0184395
								LOC339822	2p25.3	0.714286	0.114943	0.000943161	0.0184395
								SNTG2	2p25.3	0.714286	0.114943	0.000943161	0.0184395
								TPO	2p25.3	0.714286	0.114943	0.000943161	0.0184395
								PXDN	2p25.3	0.714286	0.114943	0.000943161	0.0184395
								MYT1L	2p25.3	0.714286	0.114943	0.000943161	0.0184395
								LOC730811	2p25.3	0.714286	0.114943	0.000943161	0.0184395
								TSSC1	2p25.3	0.714286	0.114943	0.000943161	0.0184395
								TRAPPC12	2p25.3	0.714286	0.114943	0.000943161	0.0184395
								ADI1	2p25.3	0.714286	0.114943	0.000943161	0.0184395
								RNASEH1	2p25.3	0.714286	0.114943	0.000943161	0.0184395
								LOC100506054	2p25.3	0.714286	0.114943	0.000943161	0.0184395
								RPS7	2p25.3	0.714286	0.114943	0.000943161	0.0184395
								COLEC11	2p25.3	0.714286	0.114943	0.000943161	0.0184395
								ALLC	2p25.3	0.714286	0.114943	0.000943161	0.0184395
								LOC100505964	2p25.3	0.714286	0.114943	0.000943161	0.0184395
								LOC727982	2p25.2	0.714286	0.114943	0.000943161	0.0184395
								SOX11	2p25.2	0.714286	0.114943	0.000943161	0.0184395
								LOC150622	2p25.2	0.714286	0.114943	0.000943161	0.0184395
								LOC400940	2p25.2	0.714286	0.114943	0.000943161	0.0184395
								LINC00487	2p25.2	0.714286	0.114943	0.000943161	0.0184395
								CMPK2	2p25.2	0.714286	0.114943	0.000943161	0.0184395
								RSAD2	2p25.2	0.714286	0.114943	0.000943161	0.0184395
								LOC386597	2p25.2	0.714286	0.114943	0.000943161	0.0184395
								RNF144A	2p25.2	0.714286	0.114943	0.000943161	0.0184395
								LOC100506274	2p25.1	0.714286	0.114943	0.000943161	0.0184395
								LOC339788	2p25.1	0.714286	0.114943	0.000943161	0.0184395
								LINC00299	2p25.1	0.714286	0.114943	0.000943161	0.0184395
								ID2	2p25.1	0.714286	0.114943	0.000943161	0.0184395
								KIDINS220	2p25.1	0.714286	0.114943	0.000943161	0.0184395
								MBOAT2	2p25.1	0.714286	0.114943	0.000943161	0.0184395
								ASAP2	2p25.1	0.714286	0.114943	0.000943161	0.0184395
								ITGB1BP1	2p25.1	0.714286	0.114943	0.000943161	0.0184395
								CPSF3	2p25.1	0.714286	0.114943	0.000943161	0.0184395
								IAH1	2p25.1	0.714286	0.114943	0.000943161	0.0184395
								ADAM17	2p25.1	0.714286	0.114943	0.000943161	0.0184395
								YWHAQ	2p25.1	0.714286	0.114943	0.000943161	0.0184395
								TAF1B	2p25.1	0.714286	0.114943	0.000943161	0.0184395
								GRHL1	2p25.1	0.714286	0.114943	0.000943161	0.0184395
								KLF11	2p25.1	0.714286	0.114943	0.000943161	0.0184395
								CYS1	2p25.1	0.714286	0.114943	0.000943161	0.0184395
								RRM2	2p25.1	0.714286	0.114943	0.000943161	0.0184395
								C2orf48	2p25.1	0.714286	0.114943	0.000943161	0.0184395
								MIR4261	2p25.1	0.714286	0.114943	0.000943161	0.0184395
								hsa-mir-4261	2p25.1	0.714286	0.114943	0.000943161	0.0184395
								HPCAL1	2p25.1	0.714286	0.114943	0.000943161	0.0184395
								ODC1	2p25.1	0.714286	0.114943	0.000943161	0.0184395
								SNORA80B	2p25.1	0.714286	0.114943	0.000943161	0.0184395
								NOL10	2p25.1	0.714286	0.114943	0.000943161	0.0184395
								ATP6V1C2	2p25.1	0.714286	0.114943	0.000943161	0.0184395
								PDIA6	2p25.1	0.714286	0.114943	0.000943161	0.0184395
								KCNF1	2p25.1	0.714286	0.114943	0.000943161	0.0184395
								FLJ33534	2p25.1	0.714286	0.114943	0.000943161	0.0184395
								C2orf50	2p25.1	0.714286	0.114943	0.000943161	0.0184395
								PQLC3	2p25.1	0.714286	0.114943	0.000943161	0.0184395
								ROCK2	2p25.1	0.714286	0.114943	0.000943161	0.0184395
								E2F6	2p25.1	0.714286	0.114943	0.000943161	0.0184395
								GREB1	2p25.1	0.714286	0.114943	0.000943161	0.0184395
								MIR4429	2p25.1	0.714286	0.114943	0.000943161	0.0184395
								NTSR2	2p25.1	0.714286	0.114943	0.000943161	0.0184395
								LPIN1	2p25.1	0.714286	0.114943	0.000943161	0.0184395
								hsa-mir-548s	2p25.1	0.714286	0.114943	0.000943161	0.0184395
								MIR4262	2p25.1	0.714286	0.114943	0.000943161	0.0184395
								hsa-mir-4262	2p25.1	0.714286	0.114943	0.000943161	0.0184395
								TRIB2	2p24.3	0.714286	0.114943	0.000943161	0.0184395
								MIR3125	2p24.3	0.714286	0.114943	0.000943161	0.0184395
								hsa-mir-3125	2p24.3	0.714286	0.114943	0.000943161	0.0184395
								LOC100506474	2p24.3	0.714286	0.114943	0.000943161	0.0184395
								FAM84A	2p24.3	0.714286	0.114943	0.000943161	0.0184395
								NBAS	2p24.3	0.714286	0.114943	0.000943161	0.0184395
								DDX1	2p24.3	0.714286	0.114943	0.000943161	0.0184395
								MYCNOS	2p24.3	0.714286	0.114943	0.000943161	0.0184395
								MYCN	2p24.3	0.714286	0.114943	0.000943161	0.0184395
								FAM49A	2p24.2	0.714286	0.114943	0.000943161	0.0184395
								RAD51AP2	2p24.2	0.714286	0.114943	0.000943161	0.0184395
								VSNL1	2p24.2	0.714286	0.114943	0.000943161	0.0184395
								SMC6	2p24.2	0.714286	0.114943	0.000943161	0.0184395
								GEN1	2p24.2	0.714286	0.114943	0.000943161	0.0184395
								MSGN1	2p24.2	0.714286	0.114943	0.000943161	0.0184395
								KCNS3	2p24.2	0.714286	0.114943	0.000943161	0.0184395
								NT5C1B-RDH14	2p24.2	0.714286	0.114943	0.000943161	0.0184395
								RDH14	2p24.2	0.714286	0.114943	0.000943161	0.0184395
								NT5C1B	2p24.2	0.714286	0.114943	0.000943161	0.0184395
								MIR4757	2p24.1	0.714286	0.114943	0.000943161	0.0184395
								OSR1	2p24.1	0.714286	0.114943	0.000943161	0.0184395
								FLJ12334	2p24.1	0.714286	0.114943	0.000943161	0.0184395
								TTC32	2p24.1	0.714286	0.114943	0.000943161	0.0184395
								WDR35	2p24.1	0.714286	0.114943	0.000943161	0.0184395
								MATN3	2p24.1	0.714286	0.114943	0.000943161	0.0184395
								LAPTM4A	2p24.1	0.714286	0.114943	0.000943161	0.0184395
								SDC1	2p24.1	0.714286	0.114943	0.000943161	0.0184395
								PUM2	2p24.1	0.714286	0.114943	0.000943161	0.0184395
								RHOB	2p24.1	0.714286	0.114943	0.000943161	0.0184395
								HS1BP3	2p24.1	0.714286	0.114943	0.000943161	0.0184395
								GDF7	2p24.1	0.714286	0.114943	0.000943161	0.0184395
								C2orf43	2p24.1	0.714286	0.114943	0.000943161	0.0184395
								APOB	2p24.1	0.714286	0.114943	0.000943161	0.0184395
								LOC645949	2p24.1	0.714286	0.114943	0.000943161	0.0184395
								KLHL29	2p24.1	0.714286	0.114943	0.000943161	0.0184395
								ATAD2B	2p24.1	0.714286	0.114943	0.000943161	0.0184395
								UBXN2A	2p23.3	0.714286	0.114943	0.000943161	0.0184395
								MFSD2B	2p23.3	0.714286	0.114943	0.000943161	0.0184395
								C2orf44	2p23.3	0.714286	0.114943	0.000943161	0.0184395
								FKBP1B	2p23.3	0.714286	0.114943	0.000943161	0.0184395
								SF3B14	2p23.3	0.714286	0.114943	0.000943161	0.0184395
								TP53I3	2p23.3	0.714286	0.114943	0.000943161	0.0184395
								PFN4	2p23.3	0.714286	0.114943	0.000943161	0.0184395
								LOC375190	2p23.3	0.714286	0.114943	0.000943161	0.0184395
								C2orf84	2p23.3	0.714286	0.114943	0.000943161	0.0184395
								ITSN2	2p23.3	0.714286	0.114943	0.000943161	0.0184395
								NCOA1	2p23.3	0.714286	0.114943	0.000943161	0.0184395
								PTRHD1	2p23.3	0.714286	0.114943	0.000943161	0.0184395
								CENPO	2p23.3	0.714286	0.114943	0.000943161	0.0184395
								ADCY3	2p23.3	0.714286	0.114943	0.000943161	0.0184395
								DNAJC27	2p23.3	0.714286	0.114943	0.000943161	0.0184395
								DNAJC27-AS1	2p23.3	0.714286	0.114943	0.000943161	0.0184395
								EFR3B	2p23.3	0.714286	0.114943	0.000943161	0.0184395
								POMC	2p23.3	0.714286	0.114943	0.000943161	0.0184395
								DNMT3A	2p23.3	0.714286	0.114943	0.000943161	0.0184395
								MIR1301	2p23.3	0.714286	0.114943	0.000943161	0.0184395
								hsa-mir-1301	2p23.3	0.714286	0.114943	0.000943161	0.0184395
								DTNB	2p23.3	0.714286	0.114943	0.000943161	0.0184395
								ASXL2	2p23.3	0.714286	0.114943	0.000943161	0.0184395
								KIF3C	2p23.3	0.714286	0.114943	0.000943161	0.0184395
								RAB10	2p23.3	0.714286	0.114943	0.000943161	0.0184395
								FAM59B	2p23.3	0.714286	0.114943	0.000943161	0.0184395
								HADHA	2p23.3	0.714286	0.114943	0.000943161	0.0184395
								HADHB	2p23.3	0.714286	0.114943	0.000943161	0.0184395
								GPR113	2p23.3	0.714286	0.114943	0.000943161	0.0184395
								EPT1	2p23.3	0.714286	0.114943	0.000943161	0.0184395
								CCDC164	2p23.3	0.714286	0.114943	0.000943161	0.0184395
								OTOF	2p23.3	0.714286	0.114943	0.000943161	0.0184395
								C2orf70	2p23.3	0.714286	0.114943	0.000943161	0.0184395
								CIB4	2p23.3	0.714286	0.114943	0.000943161	0.0184395
								KCNK3	2p23.3	0.714286	0.114943	0.000943161	0.0184395
								C2orf18	2p23.3	0.714286	0.114943	0.000943161	0.0184395
								CENPA	2p23.3	0.714286	0.114943	0.000943161	0.0184395
								DPYSL5	2p23.3	0.714286	0.114943	0.000943161	0.0184395
								MAPRE3	2p23.3	0.714286	0.114943	0.000943161	0.0184395
								TMEM214	2p23.3	0.714286	0.114943	0.000943161	0.0184395
								AGBL5	2p23.3	0.714286	0.114943	0.000943161	0.0184395
								OST4	2p23.3	0.714286	0.114943	0.000943161	0.0184395
								EMILIN1	2p23.3	0.714286	0.114943	0.000943161	0.0184395
								KHK	2p23.3	0.714286	0.114943	0.000943161	0.0184395
								CGREF1	2p23.3	0.714286	0.114943	0.000943161	0.0184395
								ABHD1	2p23.3	0.714286	0.114943	0.000943161	0.0184395
								PREB	2p23.3	0.714286	0.114943	0.000943161	0.0184395
								C2orf53	2p23.3	0.714286	0.114943	0.000943161	0.0184395
								TCF23	2p23.3	0.714286	0.114943	0.000943161	0.0184395
								SLC5A6	2p23.3	0.714286	0.114943	0.000943161	0.0184395
								C2orf28	2p23.3	0.714286	0.114943	0.000943161	0.0184395
								CAD	2p23.3	0.714286	0.114943	0.000943161	0.0184395
								SLC30A3	2p23.3	0.714286	0.114943	0.000943161	0.0184395
								DNAJC5G	2p23.3	0.714286	0.114943	0.000943161	0.0184395
								TRIM54	2p23.3	0.714286	0.114943	0.000943161	0.0184395
								UCN	2p23.3	0.714286	0.114943	0.000943161	0.0184395
								MPV17	2p23.3	0.714286	0.114943	0.000943161	0.0184395
								GTF3C2	2p23.3	0.714286	0.114943	0.000943161	0.0184395
								LOC100505624	2p23.3	0.714286	0.114943	0.000943161	0.0184395
								EIF2B4	2p23.3	0.714286	0.114943	0.000943161	0.0184395
								SNX17	2p23.3	0.714286	0.114943	0.000943161	0.0184395
								ZNF513	2p23.3	0.714286	0.114943	0.000943161	0.0184395
								PPM1G	2p23.3	0.714286	0.114943	0.000943161	0.0184395
								FTH1P3	2p23.3	0.714286	0.114943	0.000943161	0.0184395
								NRBP1	2p23.3	0.714286	0.114943	0.000943161	0.0184395
								KRTCAP3	2p23.3	0.714286	0.114943	0.000943161	0.0184395
								IFT172	2p23.3	0.714286	0.114943	0.000943161	0.0184395
								FNDC4	2p23.3	0.714286	0.114943	0.000943161	0.0184395
								GCKR	2p23.3	0.714286	0.114943	0.000943161	0.0184395
								C2orf16	2p23.3	0.714286	0.114943	0.000943161	0.0184395
								ZNF512	2p23.3	0.714286	0.114943	0.000943161	0.0184395
								CCDC121	2p23.3	0.714286	0.114943	0.000943161	0.0184395
								GPN1	2p23.3	0.714286	0.114943	0.000943161	0.0184395
								SUPT7L	2p23.3	0.714286	0.114943	0.000943161	0.0184395
								SLC4A1AP	2p23.3	0.714286	0.114943	0.000943161	0.0184395
								MRPL33	2p23.2	0.714286	0.114943	0.000943161	0.0184395
								RBKS	2p23.2	0.714286	0.114943	0.000943161	0.0184395
								BRE	2p23.2	0.714286	0.114943	0.000943161	0.0184395
								LOC100302650	2p23.2	0.714286	0.114943	0.000943161	0.0184395
								MIR4263	2p23.2	0.714286	0.114943	0.000943161	0.0184395
								hsa-mir-4263	2p23.2	0.714286	0.114943	0.000943161	0.0184395
								LOC100505716	2p23.2	0.714286	0.114943	0.000943161	0.0184395
								FOSL2	2p23.2	0.714286	0.114943	0.000943161	0.0184395
								PLB1	2p23.2	0.714286	0.114943	0.000943161	0.0184395
								PPP1CB	2p23.2	0.714286	0.114943	0.000943161	0.0184395
								SPDYA	2p23.2	0.714286	0.114943	0.000943161	0.0184395
								TRMT61B	2p23.2	0.714286	0.114943	0.000943161	0.0184395
								WDR43	2p23.2	0.714286	0.114943	0.000943161	0.0184395
								SNORD92	2p23.2	0.714286	0.114943	0.000943161	0.0184395
								SNORD53	2p23.2	0.714286	0.114943	0.000943161	0.0184395
								FAM179A	2p23.2	0.714286	0.114943	0.000943161	0.0184395
								C2orf71	2p23.2	0.714286	0.114943	0.000943161	0.0184395
								CLIP4	2p23.2	0.714286	0.114943	0.000943161	0.0184395
								ALK	2p23.2	0.714286	0.114943	0.000943161	0.0184395
								YPEL5	2p23.1	0.714286	0.114943	0.000943161	0.0184395
								LBH	2p23.1	0.714286	0.114943	0.000943161	0.0184395
								LCLAT1	2p23.1	0.714286	0.114943	0.000943161	0.0184395
								CAPN13	2p23.1	0.714286	0.114943	0.000943161	0.0184395
								GALNT14	2p23.1	0.714286	0.114943	0.000943161	0.0184395
								CAPN14	2p23.1	0.714286	0.114943	0.000943161	0.0184395
								EHD3	2p23.1	0.714286	0.114943	0.000943161	0.0184395
								XDH	2p23.1	0.714286	0.114943	0.000943161	0.0184395
								SRD5A2	2p23.1	0.714286	0.114943	0.000943161	0.0184395
								MEMO1	2p23.1	0.714286	0.114943	0.000943161	0.0184395
								DPY30	2p22.3	0.714286	0.114943	0.000943161	0.0184395
								SPAST	2p22.3	0.714286	0.114943	0.000943161	0.0184395
								SLC30A6	2p22.3	0.714286	0.114943	0.000943161	0.0184395
								NLRC4	2p22.3	0.714286	0.114943	0.000943161	0.0184395
								YIPF4	2p22.3	0.714286	0.114943	0.000943161	0.0184395
								BIRC6	2p22.3	0.714286	0.114943	0.000943161	0.0184395
								MIR558	2p22.3	0.714286	0.114943	0.000943161	0.0184395
								hsa-mir-558	2p22.3	0.714286	0.114943	0.000943161	0.0184395
								MIR4765	2p22.3	0.714286	0.114943	0.000943161	0.0184395
								TTC27	2p22.3	0.714286	0.114943	0.000943161	0.0184395
								LINC00486	2p22.3	0.714286	0.114943	0.000943161	0.0184395
								LOC100271832	2p22.3	0.714286	0.114943	0.000943161	0.0184395
								LTBP1	2p22.3	0.714286	0.114943	0.000943161	0.0184395
								RASGRP3	2p22.3	0.714286	0.114943	0.000943161	0.0184395
								FAM98A	2p22.3	0.714286	0.114943	0.000943161	0.0184395
								MYADML	2p22.3	0.714286	0.114943	0.000943161	0.0184395
								CRIM1	2p22.3	0.714286	0.114943	0.000943161	0.0184395
								LOC100288911	2p22.3	0.714286	0.114943	0.000943161	0.0184395
								FEZ2	2p22.2	0.714286	0.114943	0.000943161	0.0184395
								VIT	2p22.2	0.714286	0.114943	0.000943161	0.0184395
								STRN	2p22.2	0.714286	0.114943	0.000943161	0.0184395
								HEATR5B	2p22.2	0.714286	0.114943	0.000943161	0.0184395
								CCDC75	2p22.2	0.714286	0.114943	0.000943161	0.0184395
								EIF2AK2	2p22.2	0.714286	0.114943	0.000943161	0.0184395
								SULT6B1	2p22.2	0.714286	0.114943	0.000943161	0.0184395
								LOC100505876	2p22.2	0.714286	0.114943	0.000943161	0.0184395
								CEBPZ	2p22.2	0.714286	0.114943	0.000943161	0.0184395
								C2orf56	2p22.2	0.714286	0.114943	0.000943161	0.0184395
								PRKD3	2p22.2	0.714286	0.114943	0.000943161	0.0184395
								QPCT	2p22.2	0.714286	0.114943	0.000943161	0.0184395
								CDC42EP3	2p22.2	0.714286	0.114943	0.000943161	0.0184395
								FAM82A1	2p22.2	0.714286	0.114943	0.000943161	0.0184395
								CYP1B1	2p22.2	0.714286	0.114943	0.000943161	0.0184395
								CYP1B1-AS1	2p22.2	0.714286	0.114943	0.000943161	0.0184395
								ATL2	2p22.2	0.714286	0.114943	0.000943161	0.0184395
								HNRPLL	2p22.1	0.714286	0.114943	0.000943161	0.0184395
								GALM	2p22.1	0.714286	0.114943	0.000943161	0.0184395
								SRSF7	2p22.1	0.714286	0.114943	0.000943161	0.0184395
								GEMIN6	2p22.1	0.714286	0.114943	0.000943161	0.0184395
								DHX57	2p22.1	0.714286	0.114943	0.000943161	0.0184395
								MORN2	2p22.1	0.714286	0.114943	0.000943161	0.0184395
								ARHGEF33	2p22.1	0.714286	0.114943	0.000943161	0.0184395
								LOC375196	2p22.1	0.714286	0.114943	0.000943161	0.0184395
								SOS1	2p22.1	0.714286	0.114943	0.000943161	0.0184395
								CDKL4	2p22.1	0.714286	0.114943	0.000943161	0.0184395
								MAP4K3	2p22.1	0.714286	0.114943	0.000943161	0.0184395
								LOC728730	2p22.1	0.714286	0.114943	0.000943161	0.0184395
								TMEM178	2p22.1	0.714286	0.114943	0.000943161	0.0184395
								THUMPD2	2p22.1	0.714286	0.114943	0.000943161	0.0184395
								LOC100128590	2p22.1	0.714286	0.114943	0.000943161	0.0184395
								SLC8A1	2p22.1	0.714286	0.114943	0.000943161	0.0184395
								LOC388942	2p21	0.714286	0.114943	0.000943161	0.0184395
								LOC400950	2p21	0.714286	0.114943	0.000943161	0.0184395
								PKDCC	2p21	0.714286	0.114943	0.000943161	0.0184395
								EML4	2p21	0.714286	0.114943	0.000943161	0.0184395
								COX7A2L	2p21	0.714286	0.114943	0.000943161	0.0184395
								KCNG3	2p21	0.714286	0.114943	0.000943161	0.0184395
								MTA3	2p21	0.714286	0.114943	0.000943161	0.0184395
								OXER1	2p21	0.714286	0.114943	0.000943161	0.0184395
								HAAO	2p21	0.714286	0.114943	0.000943161	0.0184395
								ZFP36L2	2p21	0.714286	0.114943	0.000943161	0.0184395
								LOC100129726	2p21	0.714286	0.114943	0.000943161	0.0184395
								THADA	2p21	0.714286	0.114943	0.000943161	0.0184395
								PLEKHH2	2p21	0.714286	0.114943	0.000943161	0.0184395
								LOC728819	2p21	0.714286	0.114943	0.000943161	0.0184395
								DYNC2LI1	2p21	0.714286	0.114943	0.000943161	0.0184395
								ABCG5	2p21	0.714286	0.114943	0.000943161	0.0184395
								ABCG8	2p21	0.714286	0.114943	0.000943161	0.0184395
								LRPPRC	2p21	0.714286	0.114943	0.000943161	0.0184395
								PPM1B	2p21	0.714286	0.114943	0.000943161	0.0184395
								SLC3A1	2p21	0.714286	0.114943	0.000943161	0.0184395
								PREPL	2p21	0.714286	0.114943	0.000943161	0.0184395
								CAMKMT	2p21	0.714286	0.114943	0.000943161	0.0184395
								MIR548AD	2p21	0.714286	0.114943	0.000943161	0.0184395
								SIX3	2p21	0.714286	0.114943	0.000943161	0.0184395
								SIX2	2p21	0.714286	0.114943	0.000943161	0.0184395
								UNQ6975	2p21	0.714286	0.114943	0.000943161	0.0184395
								SRBD1	2p21	0.714286	0.114943	0.000943161	0.0184395
								PRKCE	2p21	0.714286	0.114943	0.000943161	0.0184395
								EPAS1	2p21	0.714286	0.114943	0.000943161	0.0184395
								LOC388946	2p21	0.714286	0.114943	0.000943161	0.0184395
								ATP6V1E2	2p21	0.714286	0.114943	0.000943161	0.0184395
								RHOQ	2p21	0.714286	0.114943	0.000943161	0.0184395
								PIGF	2p21	0.714286	0.114943	0.000943161	0.0184395
								CRIPT	2p21	0.714286	0.114943	0.000943161	0.0184395
								SOCS5	2p21	0.714286	0.114943	0.000943161	0.0184395
								LOC388948	2p21	0.714286	0.114943	0.000943161	0.0184395
								LOC100134259	2p21	0.714286	0.114943	0.000943161	0.0184395
								MCFD2	2p21	0.714286	0.114943	0.000943161	0.0184395
								TTC7A	2p21	0.714286	0.126437	0.00134362	0.0244872
								C2orf61	2p21	0.714286	0.126437	0.00134362	0.0244872
								CALM2	2p21	0.714286	0.126437	0.00134362	0.0244872
								EPCAM	2p21	0.714286	0.126437	0.00134362	0.0244872
								MIR559	2p21	0.714286	0.126437	0.00134362	0.0244872
								hsa-mir-559	2p21	0.714286	0.126437	0.00134362	0.0244872
								MSH2	2p21	0.714286	0.126437	0.00134362	0.0244872
								KCNK12	2p21	0.714286	0.126437	0.00134362	0.0244872
								MSH6	2p16.3	0.714286	0.126437	0.00134362	0.0244872
								FBXO11	2p16.3	0.714286	0.126437	0.00134362	0.0244872
								FOXN2	2p16.3	0.714286	0.126437	0.00134362	0.0244872
								PPP1R21	2p16.3	0.714286	0.126437	0.00134362	0.0244872
								STON1-GTF2A1L	2p16.3	0.714286	0.126437	0.00134362	0.0244872
								STON1	2p16.3	0.714286	0.126437	0.00134362	0.0244872
								GTF2A1L	2p16.3	0.714286	0.126437	0.00134362	0.0244872
								LHCGR	2p16.3	0.714286	0.126437	0.00134362	0.0244872
								FSHR	2p16.3	0.714286	0.126437	0.00134362	0.0244872
								NRXN1	2p16.3	0.714286	0.126437	0.00134362	0.0244872
								ASB3	2p16.2	0.714286	0.126437	0.00134362	0.0244872
								GPR75-ASB3	2p16.2	0.714286	0.126437	0.00134362	0.0244872
								CHAC2	2p16.2	0.714286	0.126437	0.00134362	0.0244872
								ERLEC1	2p16.2	0.714286	0.126437	0.00134362	0.0244872
								GPR75	2p16.2	0.714286	0.126437	0.00134362	0.0244872
								MIR3682	2p16.2	0.714286	0.126437	0.00134362	0.0244872
								PSME4	2p16.2	0.714286	0.126437	0.00134362	0.0244872
								ACYP2	2p16.2	0.714286	0.126437	0.00134362	0.0244872
								TSPYL6	2p16.2	0.714286	0.126437	0.00134362	0.0244872
								C2orf73	2p16.2	0.714286	0.126437	0.00134362	0.0244872
								SPTBN1	2p16.2	0.714286	0.126437	0.00134362	0.0244872
								RPL23AP32	2p16.2	0.714286	0.126437	0.00134362	0.0244872
								EML6	2p16.2	0.714286	0.126437	0.00134362	0.0244872
								RTN4	2p16.1	0.714286	0.126437	0.00134362	0.0244872
								C2orf63	2p16.1	0.714286	0.126437	0.00134362	0.0244872
								RPS27A	2p16.1	0.714286	0.126437	0.00134362	0.0244872
								MIR4426	2p16.1	0.714286	0.126437	0.00134362	0.0244872
								MTIF2	2p16.1	0.714286	0.126437	0.00134362	0.0244872
								PRORSD1P	2p16.1	0.714286	0.126437	0.00134362	0.0244872
								CCDC88A	2p16.1	0.714286	0.126437	0.00134362	0.0244872
								CCDC104	2p16.1	0.714286	0.126437	0.00134362	0.0244872
								SMEK2	2p16.1	0.714286	0.126437	0.00134362	0.0244872
								PNPT1	2p16.1	0.714286	0.126437	0.00134362	0.0244872
								EFEMP1	2p16.1	0.714286	0.126437	0.00134362	0.0244872
								MIR217	2p16.1	0.714286	0.126437	0.00134362	0.0244872
								hsa-mir-217	2p16.1	0.714286	0.126437	0.00134362	0.0244872
								MIR216A	2p16.1	0.714286	0.126437	0.00134362	0.0244872
								hsa-mir-216a	2p16.1	0.714286	0.126437	0.00134362	0.0244872
								MIR216B	2p16.1	0.714286	0.126437	0.00134362	0.0244872
								hsa-mir-216b	2p16.1	0.714286	0.126437	0.00134362	0.0244872
								CCDC85A	2p16.1	0.714286	0.126437	0.00134362	0.0244872
								VRK2	2p16.1	0.714286	0.126437	0.00134362	0.0244872
								FANCL	2p16.1	0.714286	0.126437	0.00134362	0.0244872
								FLJ30838	2p16.1	0.714286	0.126437	0.00134362	0.0244872
								MIR4432	2p16.1	0.714286	0.126437	0.00134362	0.0244872
								BCL11A	2p16.1	0.714286	0.126437	0.00134362	0.0244872
								PAPOLG	2p16.1	0.714286	0.126437	0.00134362	0.0244872
								FLJ16341	2p16.1	0.714286	0.126437	0.00134362	0.0244872
								REL	2p16.1	0.714286	0.126437	0.00134362	0.0244872
								PUS10	2p16.1	0.714286	0.126437	0.00134362	0.0244872
								PEX13	2p16.1	0.714286	0.126437	0.00134362	0.0244872
								KIAA1841	2p16.1	0.714286	0.126437	0.00134362	0.0244872
								LOC339803	2p15	0.714286	0.126437	0.00134362	0.0244872
								C2orf74	2p15	0.714286	0.126437	0.00134362	0.0244872
								AHSA2	2p15	0.714286	0.126437	0.00134362	0.0244872
								USP34	2p15	0.714286	0.126437	0.00134362	0.0244872
								SNORA70B	2p15	0.714286	0.126437	0.00134362	0.0244872
								XPO1	2p15	0.714286	0.126437	0.00134362	0.0244872
								FAM161A	2p15	0.714286	0.126437	0.00134362	0.0244872
								CCT4	2p15	0.714286	0.126437	0.00134362	0.0244872
								COMMD1	2p15	0.714286	0.126437	0.00134362	0.0244872
								B3GNT2	2p15	0.714286	0.126437	0.00134362	0.0244872
								TMEM17	2p15	0.714286	0.126437	0.00134362	0.0244872
								EHBP1	2p15	0.714286	0.126437	0.00134362	0.0244872
								LOC100132215	2p15	0.714286	0.126437	0.00134362	0.0244872
								OTX1	2p15	0.714286	0.126437	0.00134362	0.0244872
								DBIL5P2	2p15	0.714286	0.126437	0.00134362	0.0244872
								WDPCP	2p15	0.714286	0.126437	0.00134362	0.0244872
								MDH1	2p15	0.714286	0.126437	0.00134362	0.0244872
								UGP2	2p15	0.714286	0.126437	0.00134362	0.0244872
								VPS54	2p14	0.714286	0.126437	0.00134362	0.0244872
								PELI1	2p14	0.714286	0.114943	0.000943161	0.0184395
								LINC00309	2p14	0.714286	0.114943	0.000943161	0.0184395
								LGALSL	2p14	0.714286	0.114943	0.000943161	0.0184395
								AFTPH	2p14	0.714286	0.114943	0.000943161	0.0184395
								MIR4434	2p14	0.714286	0.114943	0.000943161	0.0184395
								LOC339807	2p14	0.714286	0.114943	0.000943161	0.0184395
								SERTAD2	2p14	0.714286	0.114943	0.000943161	0.0184395
								LOC400958	2p14	0.714286	0.114943	0.000943161	0.0184395
								SLC1A4	2p14	0.714286	0.114943	0.000943161	0.0184395
								CEP68	2p14	0.714286	0.114943	0.000943161	0.0184395
								RAB1A	2p14	0.714286	0.114943	0.000943161	0.0184395
								ACTR2	2p14	0.714286	0.114943	0.000943161	0.0184395
								SPRED2	2p14	0.714286	0.114943	0.000943161	0.0184395
								MIR4778	2p14	0.714286	0.114943	0.000943161	0.0184395
								MEIS1	2p14	0.714286	0.114943	0.000943161	0.0184395
								LOC644838	2p14	0.714286	0.114943	0.000943161	0.0184395
								ETAA1	2p14	0.714286	0.114943	0.000943161	0.0184395
								C1D	2p14	0.714286	0.114943	0.000943161	0.0184395
								WDR92	2p14	0.714286	0.114943	0.000943161	0.0184395
								PNO1	2p14	0.714286	0.114943	0.000943161	0.0184395
								PPP3R1	2p14	0.714286	0.114943	0.000943161	0.0184395
								CNRIP1	2p14	0.714286	0.114943	0.000943161	0.0184395
								PLEK	2p14	0.714286	0.114943	0.000943161	0.0184395
								FBXO48	2p13.3	0.714286	0.114943	0.000943161	0.0184395
								APLF	2p13.3	0.714286	0.114943	0.000943161	0.0184395
								PROKR1	2p13.3	0.714286	0.114943	0.000943161	0.0184395
								ARHGAP25	2p13.3	0.714286	0.114943	0.000943161	0.0184395
								BMP10	2p13.3	0.714286	0.114943	0.000943161	0.0184395
								GKN2	2p13.3	0.714286	0.114943	0.000943161	0.0184395
								GKN1	2p13.3	0.714286	0.114943	0.000943161	0.0184395
								ANTXR1	2p13.3	0.714286	0.114943	0.000943161	0.0184395
								MIR3126	2p13.3	0.714286	0.114943	0.000943161	0.0184395
								hsa-mir-3126	2p13.3	0.714286	0.114943	0.000943161	0.0184395
								GFPT1	2p13.3	0.714286	0.114943	0.000943161	0.0184395
								NFU1	2p13.3	0.714286	0.114943	0.000943161	0.0184395
								AAK1	2p13.3	0.714286	0.114943	0.000943161	0.0184395
								SNORA36C	2p13.3	0.714286	0.114943	0.000943161	0.0184395
								ANXA4	2p13.3	0.714286	0.114943	0.000943161	0.0184395
								GMCL1	2p13.3	0.714286	0.114943	0.000943161	0.0184395
								SNRNP27	2p13.3	0.714286	0.114943	0.000943161	0.0184395
								MXD1	2p13.3	0.714286	0.114943	0.000943161	0.0184395
								ASPRV1	2p13.3	0.714286	0.114943	0.000943161	0.0184395
								PCBP1-AS1	2p13.3	0.714286	0.114943	0.000943161	0.0184395
								PCBP1	2p13.3	0.714286	0.114943	0.000943161	0.0184395
								LOC100133985	2p13.3	0.714286	0.114943	0.000943161	0.0184395
								C2orf42	2p13.3	0.714286	0.114943	0.000943161	0.0184395
								TIA1	2p13.3	0.714286	0.114943	0.000943161	0.0184395
								hsa-mir-1285-2	2p13.3	0.714286	0.114943	0.000943161	0.0184395
								PCYOX1	2p13.3	0.714286	0.114943	0.000943161	0.0184395
								SNRPG	2p13.3	0.714286	0.114943	0.000943161	0.0184395
								FAM136A	2p13.3	0.714286	0.114943	0.000943161	0.0184395
								TGFA	2p13.3	0.714286	0.114943	0.000943161	0.0184395
								ADD2	2p13.3	0.714286	0.114943	0.000943161	0.0184395
								FIGLA	2p13.3	0.714286	0.114943	0.000943161	0.0184395
								CLEC4F	2p13.3	0.714286	0.114943	0.000943161	0.0184395
								CD207	2p13.3	0.714286	0.114943	0.000943161	0.0184395
								VAX2	2p13.3	0.714286	0.114943	0.000943161	0.0184395
								ATP6V1B1	2p13.3	0.714286	0.114943	0.000943161	0.0184395
								ANKRD53	2p13.3	0.714286	0.114943	0.000943161	0.0184395
								TEX261	2p13.3	0.714286	0.114943	0.000943161	0.0184395
								OR7E91P	2p13.3	0.714286	0.114943	0.000943161	0.0184395
								NAGK	2p13.3	0.714286	0.114943	0.000943161	0.0184395
								MCEE	2p13.3	0.714286	0.114943	0.000943161	0.0184395
								MPHOSPH10	2p13.3	0.714286	0.114943	0.000943161	0.0184395
								PAIP2B	2p13.3	0.714286	0.114943	0.000943161	0.0184395
								ZNF638	2p13.2	0.714286	0.114943	0.000943161	0.0184395
								DYSF	2p13.2	0.714286	0.114943	0.000943161	0.0184395
								CYP26B1	2p13.2	0.714286	0.114943	0.000943161	0.0184395
								EXOC6B	2p13.2	0.714286	0.114943	0.000943161	0.0184395
								SPR	2p13.2	0.714286	0.114943	0.000943161	0.0184395
								EMX1	2p13.2	0.714286	0.114943	0.000943161	0.0184395
								SFXN5	2p13.2	0.714286	0.114943	0.000943161	0.0184395
								RAB11FIP5	2p13.2	0.714286	0.114943	0.000943161	0.0184395
								NOTO	2p13.2	0.714286	0.114943	0.000943161	0.0184395
								SMYD5	2p13.2	0.714286	0.114943	0.000943161	0.0184395
								PRADC1	2p13.2	0.714286	0.114943	0.000943161	0.0184395
								CCT7	2p13.2	0.714286	0.114943	0.000943161	0.0184395
								FBXO41	2p13.2	0.714286	0.114943	0.000943161	0.0184395
								EGR4	2p13.1	0.714286	0.114943	0.000943161	0.0184395
								ALMS1	2p13.1	0.714286	0.114943	0.000943161	0.0184395
								NAT8	2p13.1	0.714286	0.114943	0.000943161	0.0184395
								ALMS1P	2p13.1	0.714286	0.114943	0.000943161	0.0184395
								NAT8B	2p13.1	0.714286	0.114943	0.000943161	0.0184395
								TPRKB	2p13.1	0.714286	0.114943	0.000943161	0.0184395
								DUSP11	2p13.1	0.714286	0.114943	0.000943161	0.0184395
								C2orf78	2p13.1	0.714286	0.114943	0.000943161	0.0184395
								STAMBP	2p13.1	0.714286	0.114943	0.000943161	0.0184395
								ACTG2	2p13.1	0.714286	0.114943	0.000943161	0.0184395
								DGUOK	2p13.1	0.714286	0.114943	0.000943161	0.0184395
								TET3	2p13.1	0.714286	0.114943	0.000943161	0.0184395
								BOLA3	2p13.1	0.714286	0.114943	0.000943161	0.0184395
								BOLA3-AS1	2p13.1	0.714286	0.114943	0.000943161	0.0184395
								MOB1A	2p13.1	0.714286	0.114943	0.000943161	0.0184395
								MTHFD2	2p13.1	0.714286	0.114943	0.000943161	0.0184395
								SLC4A5	2p13.1	0.714286	0.114943	0.000943161	0.0184395
								DCTN1	2p13.1	0.714286	0.114943	0.000943161	0.0184395
								LOC100189589	2p13.1	0.714286	0.114943	0.000943161	0.0184395
								C2orf81	2p13.1	0.714286	0.114943	0.000943161	0.0184395
								WDR54	2p13.1	0.714286	0.114943	0.000943161	0.0184395
								RTKN	2p13.1	0.714286	0.114943	0.000943161	0.0184395
								INO80B-WBP1	2p13.1	0.714286	0.114943	0.000943161	0.0184395
								INO80B	2p13.1	0.714286	0.114943	0.000943161	0.0184395
								MOGS	2p13.1	0.714286	0.114943	0.000943161	0.0184395
								WBP1	2p13.1	0.714286	0.114943	0.000943161	0.0184395
								CCDC142	2p13.1	0.714286	0.114943	0.000943161	0.0184395
								MRPL53	2p13.1	0.714286	0.114943	0.000943161	0.0184395
								TTC31	2p13.1	0.714286	0.114943	0.000943161	0.0184395
								LBX2	2p13.1	0.714286	0.114943	0.000943161	0.0184395
								LOC151534	2p13.1	0.714286	0.114943	0.000943161	0.0184395
								PCGF1	2p13.1	0.714286	0.114943	0.000943161	0.0184395
								TLX2	2p13.1	0.714286	0.114943	0.000943161	0.0184395
								DQX1	2p13.1	0.714286	0.114943	0.000943161	0.0184395
								AUP1	2p13.1	0.714286	0.114943	0.000943161	0.0184395
								HTRA2	2p13.1	0.714286	0.114943	0.000943161	0.0184395
								LOXL3	2p13.1	0.714286	0.114943	0.000943161	0.0184395
								DOK1	2p13.1	0.714286	0.114943	0.000943161	0.0184395
								C2orf65	2p13.1	0.714286	0.114943	0.000943161	0.0184395
								SEMA4F	2p13.1	0.714286	0.114943	0.000943161	0.0184395
								HK2	2p12	0.714286	0.114943	0.000943161	0.0184395
								POLE4	2p12	0.714286	0.114943	0.000943161	0.0184395
								TACR1	2p12	0.714286	0.114943	0.000943161	0.0184395
								FAM176A	2p12	0.714286	0.114943	0.000943161	0.0184395
								MRPL19	2p12	0.714286	0.114943	0.000943161	0.0184395
								GCFC2	2p12	0.714286	0.114943	0.000943161	0.0184395
								LRRTM4	2p12	0.714286	0.114943	0.000943161	0.0184395
								SNAR-H	2p12	0.714286	0.103448	0.00064186	0.0184395
								REG3G	2p12	0.714286	0.103448	0.00064186	0.0184395
								REG1B	2p12	0.714286	0.103448	0.00064186	0.0184395
								REG1A	2p12	0.714286	0.103448	0.00064186	0.0184395
								REG1P	2p12	0.714286	0.103448	0.00064186	0.0184395
								REG3A	2p12	0.714286	0.103448	0.00064186	0.0184395
								CTNNA2	2p12	0.714286	0.103448	0.00064186	0.0184395
								MIR4264	2p12	0.714286	0.103448	0.00064186	0.0184395
								hsa-mir-4264	2p12	0.714286	0.103448	0.00064186	0.0184395
								LRRTM1	2p12	0.714286	0.103448	0.00064186	0.0184395
								LOC1720	2p12	0.714286	0.103448	0.00064186	0.0184395
								FUNDC2P2	2p11.2	0.714286	0.103448	0.00064186	0.0184395
								SUCLG1	2p11.2	0.714286	0.103448	0.00064186	0.0184395
								DNAH6	2p11.2	0.714286	0.103448	0.00064186	0.0184395
								C2orf89	2p11.2	0.714286	0.103448	0.00064186	0.0184395
								TMSB10	2p11.2	0.714286	0.103448	0.00064186	0.0184395
								KCMF1	2p11.2	0.714286	0.103448	0.00064186	0.0184395
								TCF7L1	2p11.2	0.714286	0.103448	0.00064186	0.0184395
								TGOLN2	2p11.2	0.714286	0.103448	0.00064186	0.0184395
								RETSAT	2p11.2	0.714286	0.103448	0.00064186	0.0184395
								ELMOD3	2p11.2	0.714286	0.103448	0.00064186	0.0184395
								CAPG	2p11.2	0.714286	0.103448	0.00064186	0.0184395
								SH2D6	2p11.2	0.714286	0.103448	0.00064186	0.0184395
								LOC100630918	2p11.2	0.714286	0.103448	0.00064186	0.0184395
								MAT2A	2p11.2	0.714286	0.103448	0.00064186	0.0184395
								GGCX	2p11.2	0.714286	0.103448	0.00064186	0.0184395
								VAMP8	2p11.2	0.714286	0.103448	0.00064186	0.0184395
								VAMP5	2p11.2	0.714286	0.103448	0.00064186	0.0184395
								RNF181	2p11.2	0.714286	0.103448	0.00064186	0.0184395
								TMEM150A	2p11.2	0.714286	0.103448	0.00064186	0.0184395
								C2orf68	2p11.2	0.714286	0.103448	0.00064186	0.0184395
								USP39	2p11.2	0.714286	0.103448	0.00064186	0.0184395
								SFTPB	2p11.2	0.714286	0.103448	0.00064186	0.0184395
								GNLY	2p11.2	0.714286	0.103448	0.00064186	0.0184395
								ATOH8	2p11.2	0.714286	0.103448	0.00064186	0.0184395
								LOC284950	2p11.2	0.714286	0.103448	0.00064186	0.0184395
								ST3GAL5	2p11.2	0.714286	0.103448	0.00064186	0.0184395
								LOC90784	2p11.2	0.714286	0.103448	0.00064186	0.0184395
								POLR1A	2p11.2	0.714286	0.103448	0.00064186	0.0184395
								PTCD3	2p11.2	0.714286	0.103448	0.00064186	0.0184395
								SNORD94	2p11.2	0.714286	0.103448	0.00064186	0.0184395
								IMMT	2p11.2	0.714286	0.103448	0.00064186	0.0184395
								MIR4779	2p11.2	0.714286	0.103448	0.00064186	0.0184395
								MRPL35	2p11.2	0.714286	0.103448	0.00064186	0.0184395
								REEP1	2p11.2	0.714286	0.103448	0.00064186	0.0184395
								KDM3A	2p11.2	0.714286	0.103448	0.00064186	0.0184395
								CHMP3	2p11.2	0.714286	0.103448	0.00064186	0.0184395
								RNF103-CHMP3	2p11.2	0.714286	0.103448	0.00064186	0.0184395
								RNF103	2p11.2	0.714286	0.103448	0.00064186	0.0184395
								RMND5A	2p11.2	0.714286	0.103448	0.00064186	0.0184395
								CD8A	2p11.2	0.714286	0.103448	0.00064186	0.0184395
								CD8B	2p11.2	0.714286	0.103448	0.00064186	0.0184395
								LOC100286979	2p11.2	0.714286	0.103448	0.00064186	0.0184395
								LOC285074	2p11.2	0.714286	0.103448	0.00064186	0.0184395
								PLGLB1	2p11.2	0.714286	0.103448	0.00064186	0.0184395
								PLGLB2	2p11.2	0.714286	0.103448	0.00064186	0.0184395
								RGPD1	2p11.2	0.714286	0.103448	0.00064186	0.0184395
								RGPD2	2p11.2	0.714286	0.103448	0.00064186	0.0184395
								LINC00152	2p11.2	0.714286	0.103448	0.00064186	0.0184395
								MIR4435-1	2p11.2	0.857143	0.149425	0.000203724	0.0151866
								MIR4435-2	2p11.2	0.857143	0.149425	0.000203724	0.0151866
								KRCC1	2p11.2	0.714286	0.103448	0.00064186	0.0184395
								SMYD1	2p11.2	0.714286	0.103448	0.00064186	0.0184395
								MIR4780	2p11.2	0.714286	0.103448	0.00064186	0.0184395
								FABP1	2p11.2	0.714286	0.103448	0.00064186	0.0184395
								THNSL2	2p11.2	0.714286	0.103448	0.00064186	0.0184395
								FOXI3	2p11.2	0.714286	0.103448	0.00064186	0.0184395
								C2orf51	2p11.2	0.714286	0.103448	0.00064186	0.0184395
								EIF2AK3	2p11.2	0.714286	0.103448	0.00064186	0.0184395
								RPIA	2p11.2	0.714286	0.103448	0.00064186	0.0184395
								ANKRD36BP2	2p11.2	0.714286	0.103448	0.00064186	0.0184395
								MIR4436A	2p11.2	0.714286	0.103448	0.00064186	0.0184395
								LOC654342	2p11.1	0.714286	0.103448	0.00064186	0.0184395
								GGT8P	2p11.1	0.714286	0.103448	0.00064186	0.0184395
								ACTR3BP2	2p11.1	0.714286	0.103448	0.00064186	0.0184395
								ANKRD20A8P	2q11.1	0.857143	0.137931	0.000140944	0.0151866
								LOC90499	2q11.1	0.857143	0.137931	0.000140944	0.0151866
								LOC442028	2q11.1	0.857143	0.137931	0.000140944	0.0151866
								TEKT4	2q11.1	0.857143	0.137931	0.000140944	0.0151866
								MAL	2q11.1	0.857143	0.137931	0.000140944	0.0151866
								MRPS5	2q11.1	0.857143	0.137931	0.000140944	0.0151866
								ZNF514	2q11.1	0.857143	0.137931	0.000140944	0.0151866
								ZNF2	2q11.1	0.857143	0.137931	0.000140944	0.0151866
								PROM2	2q11.1	0.857143	0.137931	0.000140944	0.0151866
								KCNIP3	2q11.1	0.857143	0.137931	0.000140944	0.0151866
								FAHD2A	2q11.1	0.857143	0.137931	0.000140944	0.0151866
								TRIM43B	2q11.1	0.857143	0.137931	0.000140944	0.0151866
								TRIM43	2q11.1	0.857143	0.137931	0.000140944	0.0151866
								LOC729234	2q11.1	0.857143	0.137931	0.000140944	0.0151866
								GPAT2	2q11.1	0.857143	0.137931	0.000140944	0.0151866
								ADRA2B	2q11.1	0.857143	0.137931	0.000140944	0.0151866
								ASTL	2q11.1	0.857143	0.137931	0.000140944	0.0151866
								DUSP2	2q11.2	0.857143	0.137931	0.000140944	0.0151866
								STARD7	2q11.2	0.857143	0.137931	0.000140944	0.0151866
								LOC285033	2q11.2	0.857143	0.137931	0.000140944	0.0151866
								TMEM127	2q11.2	0.857143	0.137931	0.000140944	0.0151866
								CIAO1	2q11.2	0.857143	0.137931	0.000140944	0.0151866
								SNRNP200	2q11.2	0.857143	0.137931	0.000140944	0.0151866
								ITPRIPL1	2q11.2	0.857143	0.137931	0.000140944	0.0151866
								NCAPH	2q11.2	0.857143	0.137931	0.000140944	0.0151866
								NEURL3	2q11.2	0.857143	0.137931	0.000140944	0.0151866
								ARID5A	2q11.2	0.857143	0.137931	0.000140944	0.0151866
								KANSL3	2q11.2	0.857143	0.137931	0.000140944	0.0151866
								FER1L5	2q11.2	0.857143	0.137931	0.000140944	0.0151866
								LMAN2L	2q11.2	0.857143	0.137931	0.000140944	0.0151866
								CNNM4	2q11.2	0.857143	0.137931	0.000140944	0.0151866
								MIR3127	2q11.2	0.857143	0.137931	0.000140944	0.0151866
								hsa-mir-3127	2q11.2	0.857143	0.137931	0.000140944	0.0151866
								CNNM3	2q11.2	0.857143	0.137931	0.000140944	0.0151866
								ANKRD23	2q11.2	0.857143	0.137931	0.000140944	0.0151866
								ANKRD39	2q11.2	0.857143	0.137931	0.000140944	0.0151866
								SEMA4C	2q11.2	0.857143	0.137931	0.000140944	0.0151866
								FAM178B	2q11.2	0.857143	0.137931	0.000140944	0.0151866
								FAHD2B	2q11.2	0.857143	0.137931	0.000140944	0.0151866
								ANKRD36	2q11.2	0.857143	0.137931	0.000140944	0.0151866
								LOC100506123	2q11.2	0.857143	0.137931	0.000140944	0.0151866
								ANKRD36B	2q11.2	0.857143	0.137931	0.000140944	0.0151866
								COX5B	2q11.2	0.857143	0.137931	0.000140944	0.0151866
								ACTR1B	2q11.2	0.857143	0.137931	0.000140944	0.0151866
								LOC728537	2q11.2	0.857143	0.137931	0.000140944	0.0151866
								ZAP70	2q11.2	0.857143	0.137931	0.000140944	0.0151866
								TMEM131	2q11.2	0.857143	0.137931	0.000140944	0.0151866
								VWA3B	2q11.2	0.857143	0.137931	0.000140944	0.0151866
								CNGA3	2q11.2	0.857143	0.137931	0.000140944	0.0151866
								INPP4A	2q11.2	0.857143	0.137931	0.000140944	0.0151866
								COA5	2q11.2	0.857143	0.137931	0.000140944	0.0151866
								UNC50	2q11.2	0.857143	0.137931	0.000140944	0.0151866
								MGAT4A	2q11.2	0.857143	0.137931	0.000140944	0.0151866
								C2orf55	2q11.2	0.857143	0.137931	0.000140944	0.0151866
								TSGA10	2q11.2	0.857143	0.137931	0.000140944	0.0151866
								C2orf15	2q11.2	0.857143	0.137931	0.000140944	0.0151866
								LIPT1	2q11.2	0.857143	0.137931	0.000140944	0.0151866
								MITD1	2q11.2	0.857143	0.137931	0.000140944	0.0151866
								MRPL30	2q11.2	0.857143	0.137931	0.000140944	0.0151866
								LYG2	2q11.2	0.857143	0.137931	0.000140944	0.0151866
								LYG1	2q11.2	0.857143	0.137931	0.000140944	0.0151866
								TXNDC9	2q11.2	0.857143	0.137931	0.000140944	0.0151866
								EIF5B	2q11.2	0.857143	0.137931	0.000140944	0.0151866
								REV1	2q11.2	0.857143	0.137931	0.000140944	0.0151866
								AFF3	2q11.2	0.857143	0.137931	0.000140944	0.0151866
								LONRF2	2q11.2	0.857143	0.137931	0.000140944	0.0151866
								CHST10	2q11.2	0.857143	0.137931	0.000140944	0.0151866
								NMS	2q11.2	0.857143	0.137931	0.000140944	0.0151866
								PDCL3	2q11.2	0.857143	0.137931	0.000140944	0.0151866
								NPAS2	2q11.2	0.857143	0.137931	0.000140944	0.0151866
								RPL31	2q11.2	0.857143	0.137931	0.000140944	0.0151866
								TBC1D8	2q11.2	0.857143	0.137931	0.000140944	0.0151866
								C2orf29	2q11.2	0.857143	0.137931	0.000140944	0.0151866
								RNF149	2q11.2	0.857143	0.137931	0.000140944	0.0151866
								SNORD89	2q11.2	0.857143	0.137931	0.000140944	0.0151866
								CREG2	2q11.2	0.857143	0.137931	0.000140944	0.0151866
								RFX8	2q11.2	0.857143	0.137931	0.000140944	0.0151866
								MAP4K4	2q11.2	0.857143	0.137931	0.000140944	0.0151866
								IL1R2	2q11.2	0.857143	0.137931	0.000140944	0.0151866
								IL1R1	2q12.1	0.857143	0.137931	0.000140944	0.0151866
								IL1RL2	2q12.1	0.857143	0.137931	0.000140944	0.0151866
								IL1RL1	2q12.1	0.857143	0.137931	0.000140944	0.0151866
								IL18R1	2q12.1	0.857143	0.137931	0.000140944	0.0151866
								IL18RAP	2q12.1	0.857143	0.137931	0.000140944	0.0151866
								MIR4772	2q12.1	0.857143	0.137931	0.000140944	0.0151866
								SLC9A4	2q12.1	0.857143	0.137931	0.000140944	0.0151866
								SLC9A2	2q12.1	0.857143	0.137931	0.000140944	0.0151866
								MFSD9	2q12.1	0.857143	0.137931	0.000140944	0.0151866
								TMEM182	2q12.1	0.857143	0.137931	0.000140944	0.0151866
								LOC100287010	2q12.1	0.857143	0.137931	0.000140944	0.0151866
								LOC150568	2q12.1	0.857143	0.137931	0.000140944	0.0151866
								LOC284998	2q12.1	0.857143	0.137931	0.000140944	0.0151866
								LOC100506421	2q12.1	0.857143	0.137931	0.000140944	0.0151866
								POU3F3	2q12.1	0.857143	0.137931	0.000140944	0.0151866
								MRPS9	2q12.1	0.857143	0.137931	0.000140944	0.0151866
								GPR45	2q12.1	0.857143	0.137931	0.000140944	0.0151866
								TGFBRAP1	2q12.1	0.857143	0.137931	0.000140944	0.0151866
								C2orf49	2q12.1	0.857143	0.137931	0.000140944	0.0151866
								FHL2	2q12.1	0.857143	0.137931	0.000140944	0.0151866
								LOC285000	2q12.2	0.857143	0.137931	0.000140944	0.0151866
								NCK2	2q12.2	0.857143	0.137931	0.000140944	0.0151866
								C2orf40	2q12.2	0.857143	0.137931	0.000140944	0.0151866
								UXS1	2q12.2	0.857143	0.137931	0.000140944	0.0151866
								PLGLA	2q12.2	0.857143	0.137931	0.000140944	0.0151866
								RGPD3	2q12.2	0.857143	0.137931	0.000140944	0.0151866
								ST6GAL2	2q12.2	0.857143	0.137931	0.000140944	0.0151866
								LOC729121	2q12.3	0.857143	0.137931	0.000140944	0.0151866
								RGPD4	2q12.3	0.857143	0.137931	0.000140944	0.0151866
								SLC5A7	2q12.3	0.857143	0.137931	0.000140944	0.0151866
								SULT1C3	2q12.3	0.857143	0.137931	0.000140944	0.0151866
								SULT1C2	2q12.3	0.857143	0.137931	0.000140944	0.0151866
								SULT1C2P1	2q12.3	0.857143	0.137931	0.000140944	0.0151866
								SULT1C4	2q12.3	0.857143	0.137931	0.000140944	0.0151866
								GCC2	2q12.3	0.857143	0.137931	0.000140944	0.0151866
								LIMS1	2q12.3	0.857143	0.137931	0.000140944	0.0151866
								RANBP2	2q12.3	0.857143	0.137931	0.000140944	0.0151866
								CCDC138	2q12.3	0.857143	0.137931	0.000140944	0.0151866
								EDAR	2q12.3	0.857143	0.137931	0.000140944	0.0151866
								LOC100287216	2q12.3	0.857143	0.137931	0.000140944	0.0151866
								SH3RF3	2q12.3	0.857143	0.137931	0.000140944	0.0151866
								MIR4265	2q12.3	0.857143	0.137931	0.000140944	0.0151866
								hsa-mir-4265	2q12.3	0.857143	0.137931	0.000140944	0.0151866
								MIR4266	2q12.3	0.857143	0.137931	0.000140944	0.0151866
								hsa-mir-4266	2q12.3	0.857143	0.137931	0.000140944	0.0151866
								2010-09-01	2q13	0.857143	0.137931	0.000140944	0.0151866
								SOWAHC	2q13	0.857143	0.137931	0.000140944	0.0151866
								LIMS3-LOC440895	2q13	0.857143	0.137931	0.000140944	0.0151866
								LIMS3L	2q13	0.857143	0.137931	0.000140944	0.0151866
								LIMS3	2q13	0.857143	0.137931	0.000140944	0.0151866
								LOC100288570	2q13	0.857143	0.137931	0.000140944	0.0151866
								LOC440894	2q13	0.857143	0.137931	0.000140944	0.0151866
								LOC440895	2q13	0.857143	0.137931	0.000140944	0.0151866
								MALL	2q13	0.857143	0.137931	0.000140944	0.0151866
								MIR4267	2q13	0.857143	0.137931	0.000140944	0.0151866
								MIR4436B1	2q13	0.857143	0.137931	0.000140944	0.0151866
								RGPD5	2q13	0.857143	0.137931	0.000140944	0.0151866
								RGPD6	2q13	0.857143	0.137931	0.000140944	0.0151866
								hsa-mir-4267	2q13	0.857143	0.137931	0.000140944	0.0151866
								NPHP1	2q13	0.857143	0.137931	0.000140944	0.0151866
								LINC00116	2q13	0.857143	0.137931	0.000140944	0.0151866
								LOC100507334	2q13	0.857143	0.137931	0.000140944	0.0151866
								LOC151009	2q13	0.857143	0.137931	0.000140944	0.0151866
								BUB1	2q13	0.857143	0.137931	0.000140944	0.0151866
								ACOXL	2q13	0.857143	0.137931	0.000140944	0.0151866
								BCL2L11	2q13	0.857143	0.137931	0.000140944	0.0151866
								LOC541471	2q13	0.857143	0.137931	0.000140944	0.0151866
								ANAPC1	2q13	0.857143	0.137931	0.000140944	0.0151866
								MERTK	2q13	0.857143	0.137931	0.000140944	0.0151866
								TMEM87B	2q13	0.857143	0.137931	0.000140944	0.0151866
								FBLN7	2q13	0.857143	0.137931	0.000140944	0.0151866
								ZC3H8	2q13	0.857143	0.137931	0.000140944	0.0151866
								ZC3H6	2q13	0.857143	0.137931	0.000140944	0.0151866
								RGPD8	2q13	0.857143	0.137931	0.000140944	0.0151866
								TTL|chr2	2q13	0.857143	0.137931	0.000140944	0.0151866
								POLR1B	2q13	0.857143	0.137931	0.000140944	0.0151866
								CHCHD5	2q13	0.857143	0.137931	0.000140944	0.0151866
								FLJ42351	2q13	0.857143	0.137931	0.000140944	0.0151866
								SLC20A1	2q13	0.857143	0.137931	0.000140944	0.0151866
								CKAP2L	2q13	0.857143	0.137931	0.000140944	0.0151866
								IL1A	2q13	0.857143	0.137931	0.000140944	0.0151866
								IL1B	2q13	0.857143	0.137931	0.000140944	0.0151866
								IL37	2q13	0.857143	0.137931	0.000140944	0.0151866
								IL36G	2q13	0.857143	0.137931	0.000140944	0.0151866
								IL36A	2q13	0.857143	0.137931	0.000140944	0.0151866
								IL36B	2q13	0.857143	0.137931	0.000140944	0.0151866
								IL36RN	2q13	0.857143	0.137931	0.000140944	0.0151866
								IL1F10	2q13	0.857143	0.137931	0.000140944	0.0151866
								IL1RN	2q13	0.857143	0.137931	0.000140944	0.0151866
								PSD4	2q13	0.857143	0.137931	0.000140944	0.0151866
								PAX8	2q13	0.857143	0.137931	0.000140944	0.0151866
								LOC654433	2q13	0.857143	0.137931	0.000140944	0.0151866
								CBWD2	2q13	0.857143	0.137931	0.000140944	0.0151866
								FOXD4L1	2q13	0.857143	0.137931	0.000140944	0.0151866
								FAM138B	2q13	0.857143	0.137931	0.000140944	0.0151866
								hsa-mir-1302-3	2q13	0.857143	0.137931	0.000140944	0.0151866
								DDX11L2	2q13	0.857143	0.137931	0.000140944	0.0151866
								RABL2A	2q13	0.857143	0.137931	0.000140944	0.0151866
								RPL23AP7	2q13	0.857143	0.137931	0.000140944	0.0151866
								WASH2P	2q13	0.857143	0.137931	0.000140944	0.0151866
								MIR4782	2q14.1	0.857143	0.149425	0.000203724	0.0151866
								SLC35F5	2q14.1	0.857143	0.149425	0.000203724	0.0151866
								ACTR3	2q14.1	0.857143	0.149425	0.000203724	0.0151866
								LOC100499194	2q14.1	0.857143	0.149425	0.000203724	0.0151866
								LOC440900	2q14.1	0.857143	0.149425	0.000203724	0.0151866
								DPP10	2q14.1	0.857143	0.149425	0.000203724	0.0151866
								LOC389023	2q14.1	0.857143	0.149425	0.000203724	0.0151866
								DDX18	2q14.1	0.857143	0.149425	0.000203724	0.0151866
								CCDC93	2q14.1	0.857143	0.149425	0.000203724	0.0151866
								INSIG2	2q14.2	0.857143	0.149425	0.000203724	0.0151866
								EN1	2q14.2	0.857143	0.149425	0.000203724	0.0151866
								MARCO	2q14.2	0.857143	0.149425	0.000203724	0.0151866
								C1QL2	2q14.2	0.857143	0.149425	0.000203724	0.0151866
								STEAP3	2q14.2	0.857143	0.149425	0.000203724	0.0151866
								C2orf76	2q14.2	0.857143	0.149425	0.000203724	0.0151866
								DBI	2q14.2	0.857143	0.149425	0.000203724	0.0151866
								TMEM37	2q14.2	0.857143	0.149425	0.000203724	0.0151866
								SCTR	2q14.2	0.857143	0.149425	0.000203724	0.0151866
								PCDP1	2q14.2	0.857143	0.149425	0.000203724	0.0151866
								TMEM177	2q14.2	0.857143	0.149425	0.000203724	0.0151866
								PTPN4	2q14.2	0.857143	0.149425	0.000203724	0.0151866
								EPB41L5	2q14.2	0.857143	0.149425	0.000203724	0.0151866
								TMEM185B	2q14.2	0.857143	0.149425	0.000203724	0.0151866
								RALB	2q14.2	0.857143	0.149425	0.000203724	0.0151866
								INHBB	2q14.2	0.857143	0.149425	0.000203724	0.0151866
								LOC84931	2q14.2	0.857143	0.149425	0.000203724	0.0151866
								GLI2	2q14.2	0.857143	0.149425	0.000203724	0.0151866
								TFCP2L1	2q14.2	0.857143	0.149425	0.000203724	0.0151866
								CLASP1	2q14.2	0.857143	0.149425	0.000203724	0.0151866
								RNU4ATAC	2q14.2	0.857143	0.149425	0.000203724	0.0151866
								LOC254128	2q14.3	0.857143	0.149425	0.000203724	0.0151866
								MKI67IP	2q14.3	0.857143	0.149425	0.000203724	0.0151866
								TSN	2q14.3	0.857143	0.149425	0.000203724	0.0151866
								CNTNAP5	2q14.3	0.857143	0.149425	0.000203724	0.0151866
								GYPC	2q14.3	0.857143	0.149425	0.000203724	0.0151866
								BIN1	2q14.3	0.857143	0.149425	0.000203724	0.0151866
								CYP27C1	2q14.3	0.857143	0.149425	0.000203724	0.0151866
								ERCC3	2q14.3	0.857143	0.149425	0.000203724	0.0151866
								MAP3K2	2q14.3	0.857143	0.149425	0.000203724	0.0151866
								PROC	2q14.3	0.857143	0.149425	0.000203724	0.0151866
								MIR4783	2q14.3	0.857143	0.149425	0.000203724	0.0151866
								IWS1	2q14.3	0.857143	0.149425	0.000203724	0.0151866
								MYO7B	2q14.3	0.857143	0.149425	0.000203724	0.0151866
								LIMS2	2q14.3	0.857143	0.149425	0.000203724	0.0151866
								GPR17	2q14.3	0.857143	0.149425	0.000203724	0.0151866
								SFT2D3	2q14.3	0.857143	0.149425	0.000203724	0.0151866
								WDR33	2q14.3	0.857143	0.149425	0.000203724	0.0151866
								POLR2D	2q14.3	0.857143	0.149425	0.000203724	0.0151866
								AMMECR1L	2q14.3	0.857143	0.149425	0.000203724	0.0151866
								SAP130	2q14.3	0.857143	0.149425	0.000203724	0.0151866
								UGGT1	2q14.3	0.857143	0.149425	0.000203724	0.0151866
								HS6ST1	2q14.3	0.857143	0.149425	0.000203724	0.0151866
								LOC389033	2q21.1	0.857143	0.149425	0.000203724	0.0151866
								LOC100131320	2q21.1	0.857143	0.149425	0.000203724	0.0151866
								RAB6C	2q21.1	0.857143	0.149425	0.000203724	0.0151866
								LOC440905	2q21.1	0.857143	0.149425	0.000203724	0.0151866
								POTEF	2q21.1	0.857143	0.149425	0.000203724	0.0151866
								LOC285103	2q21.1	0.857143	0.149425	0.000203724	0.0151866
								CCDC74B	2q21.1	0.857143	0.149425	0.000203724	0.0151866
								SMPD4	2q21.1	0.857143	0.149425	0.000203724	0.0151866
								MZT2B	2q21.1	0.857143	0.149425	0.000203724	0.0151866
								TUBA3E	2q21.1	0.857143	0.149425	0.000203724	0.0151866
								CCDC115	2q21.1	0.857143	0.149425	0.000203724	0.0151866
								IMP4	2q21.1	0.857143	0.149425	0.000203724	0.0151866
								PTPN18	2q21.1	0.857143	0.149425	0.000203724	0.0151866
								CFC1B	2q21.1	0.857143	0.149425	0.000203724	0.0151866
								CFC1	2q21.1	0.857143	0.149425	0.000203724	0.0151866
								LOC100216479	2q21.1	0.857143	0.149425	0.000203724	0.0151866
								LOC150527	2q21.1	0.857143	0.149425	0.000203724	0.0151866
								LOC646743	2q21.1	0.857143	0.149425	0.000203724	0.0151866
								TISP43	2q21.1	0.857143	0.149425	0.000203724	0.0151866
								CYP4F30P	2q21.1	0.857143	0.149425	0.000203724	0.0151866
								GPR148	2q21.1	0.857143	0.149425	0.000203724	0.0151866
								FAM123C	2q21.1	0.857143	0.149425	0.000203724	0.0151866
								ARHGEF4	2q21.1	0.857143	0.149425	0.000203724	0.0151866
								FAM168B	2q21.1	0.857143	0.149425	0.000203724	0.0151866
								PLEKHB2	2q21.1	0.857143	0.149425	0.000203724	0.0151866
								POTEE	2q21.1	0.857143	0.149425	0.000203724	0.0151866
								LOC440910	2q21.1	0.857143	0.149425	0.000203724	0.0151866
								WTH3DI	2q21.1	0.857143	0.149425	0.000203724	0.0151866
								LOC389043	2q21.1	0.857143	0.149425	0.000203724	0.0151866
								LOC401010	2q21.1	0.857143	0.149425	0.000203724	0.0151866
								TUBA3D	2q21.1	0.857143	0.149425	0.000203724	0.0151866
								MIR4784	2q21.1	0.857143	0.149425	0.000203724	0.0151866
								MZT2A	2q21.1	0.857143	0.149425	0.000203724	0.0151866
								LOC150776	2q21.1	0.857143	0.149425	0.000203724	0.0151866
								CCDC74A	2q21.1	0.857143	0.149425	0.000203724	0.0151866
								POTEKP	2q21.1	0.857143	0.149425	0.000203724	0.0151866
								C2orf27A	2q21.1	0.857143	0.149425	0.000203724	0.0151866
								C2orf27B	2q21.2	0.857143	0.149425	0.000203724	0.0151866
								ANKRD30BL	2q21.2	0.857143	0.149425	0.000203724	0.0151866
								MIR663B	2q21.2	0.857143	0.149425	0.000203724	0.0151866
								hsa-mir-663b	2q21.2	0.857143	0.149425	0.000203724	0.0151866
								GPR39	2q21.2	0.857143	0.149425	0.000203724	0.0151866
								LYPD1	2q21.2	0.857143	0.149425	0.000203724	0.0151866
								NCKAP5	2q21.2	0.857143	0.149425	0.000203724	0.0151866
								MIR3679	2q21.2	0.857143	0.149425	0.000203724	0.0151866
								MGAT5	2q21.2	0.857143	0.149425	0.000203724	0.0151866
								TMEM163	2q21.3	0.857143	0.149425	0.000203724	0.0151866
								ACMSD	2q21.3	0.857143	0.149425	0.000203724	0.0151866
								LOC100129961	2q21.3	0.857143	0.149425	0.000203724	0.0151866
								CCNT2	2q21.3	0.857143	0.149425	0.000203724	0.0151866
								YSK4	2q21.3	0.857143	0.149425	0.000203724	0.0151866
								RAB3GAP1	2q21.3	0.857143	0.149425	0.000203724	0.0151866
								ZRANB3	2q21.3	0.857143	0.149425	0.000203724	0.0151866
								R3HDM1	2q21.3	0.857143	0.149425	0.000203724	0.0151866
								MIR128-1	2q21.3	0.857143	0.149425	0.000203724	0.0151866
								hsa-mir-128-1	2q21.3	0.857143	0.149425	0.000203724	0.0151866
								UBXN4	2q21.3	0.857143	0.149425	0.000203724	0.0151866
								LCT	2q21.3	0.857143	0.149425	0.000203724	0.0151866
								LOC100507600	2q21.3	0.857143	0.149425	0.000203724	0.0151866
								MCM6	2q21.3	0.857143	0.149425	0.000203724	0.0151866
								DARS	2q21.3	0.857143	0.149425	0.000203724	0.0151866
								CXCR4	2q22.1	0.857143	0.149425	0.000203724	0.0151866
								THSD7B	2q22.1	0.857143	0.149425	0.000203724	0.0151866
								HNMT	2q22.1	0.857143	0.149425	0.000203724	0.0151866
								SPOPL	2q22.1	0.857143	0.149425	0.000203724	0.0151866
								NXPH2	2q22.1	0.857143	0.149425	0.000203724	0.0151866
								LOC647012	2q22.1	0.857143	0.149425	0.000203724	0.0151866
								LRP1B	2q22.1	0.857143	0.149425	0.000203724	0.0151866
								KYNU	2q22.2	0.857143	0.149425	0.000203724	0.0151866
								ARHGAP15	2q22.2	0.857143	0.149425	0.000203724	0.0151866
								GTDC1	2q22.3	0.857143	0.149425	0.000203724	0.0151866
								ZEB2	2q22.3	0.857143	0.149425	0.000203724	0.0151866
								ZEB2-AS1	2q22.3	0.857143	0.149425	0.000203724	0.0151866
								DKFZp686O1327	2q22.3	0.857143	0.149425	0.000203724	0.0151866
								PABPC1P2	2q22.3	0.857143	0.149425	0.000203724	0.0151866
								ACVR2A	2q22.3	0.857143	0.149425	0.000203724	0.0151866
								ORC4	2q22.3	0.857143	0.149425	0.000203724	0.0151866
								MBD5	2q23.1	0.857143	0.16092	0.000287788	0.0184395
								EPC2	2q23.1	0.857143	0.16092	0.000287788	0.0184395
								KIF5C	2q23.1	0.857143	0.16092	0.000287788	0.0184395
								LYPD6B	2q23.1	0.857143	0.16092	0.000287788	0.0184395
								LYPD6	2q23.2	0.857143	0.16092	0.000287788	0.0184395
								MMADHC	2q23.2	0.857143	0.16092	0.000287788	0.0184395
								RND3	2q23.3	0.857143	0.16092	0.000287788	0.0184395
								RBM43	2q23.3	0.857143	0.16092	0.000287788	0.0184395
								NMI	2q23.3	0.857143	0.16092	0.000287788	0.0184395
								TNFAIP6	2q23.3	0.857143	0.16092	0.000287788	0.0184395
								MIR4773-1	2q23.3	0.857143	0.16092	0.000287788	0.0184395
								MIR4773-2	2q23.3	0.857143	0.16092	0.000287788	0.0184395
								RIF1	2q23.3	0.857143	0.16092	0.000287788	0.0184395
								NEB	2q23.3	0.857143	0.172414	0.000398359	0.0184395
								ARL5A	2q23.3	0.857143	0.172414	0.000398359	0.0184395
								CACNB4	2q23.3	0.857143	0.172414	0.000398359	0.0184395
								STAM2	2q23.3	0.857143	0.172414	0.000398359	0.0184395
								FMNL2	2q23.3	0.857143	0.172414	0.000398359	0.0184395
								PRPF40A	2q23.3	0.857143	0.172414	0.000398359	0.0184395
								ARL6IP6	2q23.3	0.857143	0.172414	0.000398359	0.0184395
								RPRM	2q23.3	0.857143	0.172414	0.000398359	0.0184395
								GALNT13	2q23.3	0.857143	0.172414	0.000398359	0.0184395
								LOC100144595	2q24.1	0.857143	0.172414	0.000398359	0.0184395
								KCNJ3	2q24.1	0.857143	0.172414	0.000398359	0.0184395
								NR4A2	2q24.1	0.857143	0.172414	0.000398359	0.0184395
								GPD2	2q24.1	0.857143	0.172414	0.000398359	0.0184395
								GALNT5	2q24.1	0.857143	0.172414	0.000398359	0.0184395
								ERMN	2q24.1	0.857143	0.172414	0.000398359	0.0184395
								CYTIP	2q24.1	0.857143	0.172414	0.000398359	0.0184395
								ACVR1C	2q24.1	0.857143	0.172414	0.000398359	0.0184395
								ACVR1	2q24.1	0.857143	0.172414	0.000398359	0.0184395
								UPP2	2q24.1	0.857143	0.172414	0.000398359	0.0184395
								LOC554201	2q24.1	0.857143	0.172414	0.000398359	0.0184395
								CCDC148	2q24.1	0.857143	0.172414	0.000398359	0.0184395
								PKP4	2q24.1	0.857143	0.172414	0.000398359	0.0184395
								DAPL1	2q24.1	0.857143	0.172414	0.000398359	0.0184395
								TANC1	2q24.2	0.857143	0.172414	0.000398359	0.0184395
								WDSUB1	2q24.2	0.857143	0.172414	0.000398359	0.0184395
								BAZ2B	2q24.2	0.857143	0.172414	0.000398359	0.0184395
								2007-03-01	2q24.2	0.857143	0.172414	0.000398359	0.0184395
								CD302	2q24.2	0.857143	0.172414	0.000398359	0.0184395
								LY75-CD302	2q24.2	0.857143	0.172414	0.000398359	0.0184395
								LY75	2q24.2	0.857143	0.172414	0.000398359	0.0184395
								PLA2R1	2q24.2	0.857143	0.172414	0.000398359	0.0184395
								ITGB6	2q24.2	0.857143	0.172414	0.000398359	0.0184395
								RBMS1	2q24.2	0.857143	0.172414	0.000398359	0.0184395
								MIR4785	2q24.2	0.857143	0.172414	0.000398359	0.0184395
								TANK	2q24.2	0.857143	0.172414	0.000398359	0.0184395
								PSMD14	2q24.2	0.857143	0.172414	0.000398359	0.0184395
								TBR1	2q24.2	0.857143	0.172414	0.000398359	0.0184395
								SLC4A10	2q24.2	0.857143	0.183908	0.000541496	0.0184395
								DPP4	2q24.2	0.857143	0.183908	0.000541496	0.0184395
								GCG	2q24.2	0.857143	0.183908	0.000541496	0.0184395
								FAP	2q24.2	0.857143	0.183908	0.000541496	0.0184395
								IFIH1	2q24.2	0.857143	0.183908	0.000541496	0.0184395
								GCA	2q24.2	0.857143	0.183908	0.000541496	0.0184395
								KCNH7	2q24.2	0.857143	0.183908	0.000541496	0.0184395
								FIGN	2q24.3	0.857143	0.183908	0.000541496	0.0184395
								GRB14	2q24.3	0.857143	0.183908	0.000541496	0.0184395
								COBLL1	2q24.3	0.857143	0.183908	0.000541496	0.0184395
								SNORA70F	2q24.3	0.857143	0.183908	0.000541496	0.0184395
								SLC38A11	2q24.3	0.857143	0.183908	0.000541496	0.0184395
								SCN3A	2q24.3	0.857143	0.183908	0.000541496	0.0184395
								SCN2A	2q24.3	0.857143	0.183908	0.000541496	0.0184395
								CSRNP3	2q24.3	0.857143	0.183908	0.000541496	0.0184395
								GALNT3	2q24.3	0.857143	0.183908	0.000541496	0.0184395
								LOC100506124	2q24.3	0.857143	0.183908	0.000541496	0.0184395
								TTC21B	2q24.3	0.857143	0.183908	0.000541496	0.0184395
								LOC100506134	2q24.3	0.857143	0.183908	0.000541496	0.0184395
								SCN1A	2q24.3	0.857143	0.183908	0.000541496	0.0184395
								SCN9A	2q24.3	0.857143	0.183908	0.000541496	0.0184395
								SCN7A	2q24.3	0.857143	0.183908	0.000541496	0.0184395
								XIRP2	2q24.3	0.857143	0.183908	0.000541496	0.0184395
								B3GALT1	2q24.3	0.857143	0.183908	0.000541496	0.0184395
								STK39	2q24.3	0.857143	0.183908	0.000541496	0.0184395
								CERS6	2q24.3	0.857143	0.183908	0.000541496	0.0184395
								MIR4774	2q24.3	0.857143	0.183908	0.000541496	0.0184395
								LOC100861402	2q24.3	0.857143	0.183908	0.000541496	0.0184395
								NOSTRIN	2q24.3	0.857143	0.183908	0.000541496	0.0184395
								SPC25	2q31.1	0.857143	0.183908	0.000541496	0.0184395
								G6PC2	2q31.1	0.857143	0.183908	0.000541496	0.0184395
								ABCB11	2q31.1	0.857143	0.183908	0.000541496	0.0184395
								DHRS9	2q31.1	0.857143	0.183908	0.000541496	0.0184395
								LRP2	2q31.1	0.857143	0.183908	0.000541496	0.0184395
								BBS5	2q31.1	0.857143	0.183908	0.000541496	0.0184395
								KBTBD10	2q31.1	0.857143	0.183908	0.000541496	0.0184395
								FASTKD1	2q31.1	0.857143	0.183908	0.000541496	0.0184395
								PPIG	2q31.1	0.857143	0.183908	0.000541496	0.0184395
								C2orf77	2q31.1	0.857143	0.183908	0.000541496	0.0184395
								PHOSPHO2-KLHL23	2q31.1	0.857143	0.183908	0.000541496	0.0184395
								PHOSPHO2	2q31.1	0.857143	0.183908	0.000541496	0.0184395
								KLHL23	2q31.1	0.857143	0.183908	0.000541496	0.0184395
								SSB	2q31.1	0.857143	0.183908	0.000541496	0.0184395
								METTL5	2q31.1	0.857143	0.183908	0.000541496	0.0184395
								UBR3	2q31.1	0.857143	0.183908	0.000541496	0.0184395
								MYO3B	2q31.1	0.857143	0.183908	0.000541496	0.0184395
								LOC440925	2q31.1	0.857143	0.183908	0.000541496	0.0184395
								SP5	2q31.1	0.857143	0.183908	0.000541496	0.0184395
								LOC100505695	2q31.1	0.857143	0.183908	0.000541496	0.0184395
								GAD1	2q31.1	0.857143	0.183908	0.000541496	0.0184395
								GORASP2	2q31.1	0.857143	0.183908	0.000541496	0.0184395
								TLK1	2q31.1	0.857143	0.183908	0.000541496	0.0184395
								METTL8	2q31.1	0.857143	0.183908	0.000541496	0.0184395
								DCAF17	2q31.1	0.857143	0.183908	0.000541496	0.0184395
								CYBRD1	2q31.1	0.857143	0.183908	0.000541496	0.0184395
								DYNC1I2	2q31.1	0.857143	0.183908	0.000541496	0.0184395
								SLC25A12	2q31.1	0.857143	0.183908	0.000541496	0.0184395
								HAT1	2q31.1	0.857143	0.183908	0.000541496	0.0184395
								METAP1D	2q31.1	0.857143	0.183908	0.000541496	0.0184395
								DLX1	2q31.1	0.857143	0.183908	0.000541496	0.0184395
								DLX2	2q31.1	0.857143	0.183908	0.000541496	0.0184395
								ITGA6	2q31.1	0.857143	0.183908	0.000541496	0.0184395
								PDK1	2q31.1	0.857143	0.183908	0.000541496	0.0184395
								LOC91149	2q31.1	0.857143	0.183908	0.000541496	0.0184395
								RAPGEF4	2q31.1	0.857143	0.183908	0.000541496	0.0184395
								ZAK	2q31.1	0.857143	0.183908	0.000541496	0.0184395
								MLK7-AS1	2q31.1	0.857143	0.183908	0.000541496	0.0184395
								CDCA7	2q31.1	0.857143	0.183908	0.000541496	0.0184395
								SP3	2q31.1	0.857143	0.183908	0.000541496	0.0184395
								OLA1	2q31.1	0.857143	0.183908	0.000541496	0.0184395
								LOC285084	2q31.1	0.857143	0.183908	0.000541496	0.0184395
								SP9	2q31.1	0.857143	0.183908	0.000541496	0.0184395
								CIR1	2q31.1	0.857143	0.183908	0.000541496	0.0184395
								SCRN3	2q31.1	0.857143	0.183908	0.000541496	0.0184395
								GPR155	2q31.1	0.857143	0.183908	0.000541496	0.0184395
								WIPF1	2q31.1	0.857143	0.183908	0.000541496	0.0184395
								CHRNA1	2q31.1	0.857143	0.183908	0.000541496	0.0184395
								CHN1	2q31.1	0.857143	0.183908	0.000541496	0.0184395
								ATF2	2q31.1	0.857143	0.183908	0.000541496	0.0184395
								MIR933	2q31.1	0.857143	0.183908	0.000541496	0.0184395
								hsa-mir-933	2q31.1	0.857143	0.183908	0.000541496	0.0184395
								ATP5G3	2q31.1	0.857143	0.183908	0.000541496	0.0184395
								KIAA1715	2q31.1	0.857143	0.183908	0.000541496	0.0184395
								EVX2	2q31.1	0.857143	0.183908	0.000541496	0.0184395
								HOXD13	2q31.1	0.857143	0.183908	0.000541496	0.0184395
								HOXD12	2q31.1	0.857143	0.183908	0.000541496	0.0184395
								HOXD11	2q31.1	0.857143	0.183908	0.000541496	0.0184395
								HOXD10	2q31.1	0.857143	0.183908	0.000541496	0.0184395
								HOXD9	2q31.1	0.857143	0.183908	0.000541496	0.0184395
								HOXD8	2q31.1	0.857143	0.183908	0.000541496	0.0184395
								LOC100506783	2q31.1	0.857143	0.183908	0.000541496	0.0184395
								MIR10B	2q31.1	0.857143	0.183908	0.000541496	0.0184395
								hsa-mir-10b	2q31.1	0.857143	0.183908	0.000541496	0.0184395
								HOXD4	2q31.1	0.857143	0.183908	0.000541496	0.0184395
								HOXD3	2q31.1	0.857143	0.183908	0.000541496	0.0184395
								LOC401022	2q31.1	0.857143	0.183908	0.000541496	0.0184395
								HOXD1	2q31.1	0.857143	0.183908	0.000541496	0.0184395
								MTX2	2q31.1	0.857143	0.183908	0.000541496	0.0184395
								MIR1246	2q31.1	0.857143	0.183908	0.000541496	0.0184395
								hsa-mir-1246	2q31.1	0.857143	0.183908	0.000541496	0.0184395
								LOC375295	2q31.1	0.857143	0.183908	0.000541496	0.0184395
								HNRNPA3	2q31.2	0.857143	0.183908	0.000541496	0.0184395
								MIR4444-1|chr2	2q31.2	0.857143	0.183908	0.000541496	0.0184395
								NFE2L2	2q31.2	0.857143	0.183908	0.000541496	0.0184395
								MIR3128	2q31.2	0.857143	0.183908	0.000541496	0.0184395
								hsa-mir-3128	2q31.2	0.857143	0.183908	0.000541496	0.0184395
								LOC100130691	2q31.2	0.857143	0.183908	0.000541496	0.0184395
								AGPS	2q31.2	0.857143	0.183908	0.000541496	0.0184395
								TTC30B	2q31.2	0.857143	0.183908	0.000541496	0.0184395
								TTC30A	2q31.2	0.857143	0.183908	0.000541496	0.0184395
								PDE11A	2q31.2	0.857143	0.183908	0.000541496	0.0184395
								RBM45	2q31.2	0.857143	0.183908	0.000541496	0.0184395
								OSBPL6	2q31.2	0.857143	0.183908	0.000541496	0.0184395
								MIR548N	2q31.2	0.857143	0.183908	0.000541496	0.0184395
								PRKRA	2q31.2	0.857143	0.183908	0.000541496	0.0184395
								DFNB59	2q31.2	0.857143	0.183908	0.000541496	0.0184395
								FKBP7	2q31.2	0.857143	0.183908	0.000541496	0.0184395
								PLEKHA3	2q31.2	0.857143	0.183908	0.000541496	0.0184395
								LOC100506866	2q31.2	0.857143	0.183908	0.000541496	0.0184395
								TTN	2q31.2	0.857143	0.183908	0.000541496	0.0184395
								CCDC141	2q31.2	0.857143	0.183908	0.000541496	0.0184395
								SESTD1	2q31.2	0.857143	0.183908	0.000541496	0.0184395
								ZNF385B	2q31.2	0.857143	0.183908	0.000541496	0.0184395
								MIR1258	2q31.3	0.857143	0.183908	0.000541496	0.0184395
								hsa-mir-1258	2q31.3	0.857143	0.183908	0.000541496	0.0184395
								CWC22	2q31.3	0.857143	0.183908	0.000541496	0.0184395
								UBE2E3	2q31.3	0.857143	0.183908	0.000541496	0.0184395
								MIR4437	2q31.3	0.857143	0.183908	0.000541496	0.0184395
								ITGA4	2q31.3	0.857143	0.183908	0.000541496	0.0184395
								CERKL	2q31.3	0.857143	0.183908	0.000541496	0.0184395
								NEUROD1	2q31.3	0.857143	0.183908	0.000541496	0.0184395
								SSFA2	2q31.3	0.857143	0.183908	0.000541496	0.0184395
								PPP1R1C	2q31.3	0.857143	0.183908	0.000541496	0.0184395
								PDE1A	2q32.1	0.857143	0.183908	0.000541496	0.0184395
								DNAJC10	2q32.1	0.857143	0.183908	0.000541496	0.0184395
								FRZB	2q32.1	0.857143	0.183908	0.000541496	0.0184395
								NCKAP1	2q32.1	0.857143	0.183908	0.000541496	0.0184395
								DUSP19	2q32.1	0.857143	0.183908	0.000541496	0.0184395
								NUP35	2q32.1	0.857143	0.183908	0.000541496	0.0184395
								ZNF804A	2q32.1	0.857143	0.183908	0.000541496	0.0184395
								FSIP2	2q32.1	0.857143	0.183908	0.000541496	0.0184395
								ZC3H15	2q32.1	0.857143	0.183908	0.000541496	0.0184395
								ITGAV	2q32.1	0.857143	0.183908	0.000541496	0.0184395
								FAM171B	2q32.1	0.857143	0.183908	0.000541496	0.0184395
								ZSWIM2	2q32.1	0.857143	0.183908	0.000541496	0.0184395
								CALCRL	2q32.1	0.857143	0.183908	0.000541496	0.0184395
								TFPI	2q32.1	0.857143	0.183908	0.000541496	0.0184395
								GULP1	2q32.1	0.857143	0.183908	0.000541496	0.0184395
								MIR561	2q32.1	0.857143	0.183908	0.000541496	0.0184395
								hsa-mir-561	2q32.1	0.857143	0.183908	0.000541496	0.0184395
								DIRC1	2q32.2	0.857143	0.183908	0.000541496	0.0184395
								COL3A1	2q32.2	0.857143	0.183908	0.000541496	0.0184395
								MIR1245A	2q32.2	0.857143	0.183908	0.000541496	0.0184395
								MIR1245B	2q32.2	0.857143	0.183908	0.000541496	0.0184395
								hsa-mir-1245	2q32.2	0.857143	0.183908	0.000541496	0.0184395
								MIR3606	2q32.2	0.857143	0.183908	0.000541496	0.0184395
								COL5A2	2q32.2	0.857143	0.183908	0.000541496	0.0184395
								MIR3129	2q32.2	0.857143	0.183908	0.000541496	0.0184395
								hsa-mir-3129	2q32.2	0.857143	0.183908	0.000541496	0.0184395
								WDR75	2q32.2	0.857143	0.183908	0.000541496	0.0184395
								SLC40A1	2q32.2	0.857143	0.183908	0.000541496	0.0184395
								ASNSD1	2q32.2	0.857143	0.183908	0.000541496	0.0184395
								ANKAR	2q32.2	0.857143	0.183908	0.000541496	0.0184395
								OSGEPL1	2q32.2	0.857143	0.183908	0.000541496	0.0184395
								ORMDL1	2q32.2	0.857143	0.183908	0.000541496	0.0184395
								PMS1	2q32.2	0.857143	0.183908	0.000541496	0.0184395
								MSTN	2q32.2	0.857143	0.183908	0.000541496	0.0184395
								C2orf88	2q32.2	0.857143	0.183908	0.000541496	0.0184395
								HIBCH	2q32.2	0.857143	0.183908	0.000541496	0.0184395
								INPP1	2q32.2	0.857143	0.183908	0.000541496	0.0184395
								MFSD6	2q32.2	0.857143	0.183908	0.000541496	0.0184395
								TMEM194B	2q32.2	0.857143	0.183908	0.000541496	0.0184395
								NAB1	2q32.2	0.857143	0.183908	0.000541496	0.0184395
								GLS	2q32.2	0.857143	0.183908	0.000541496	0.0184395
								STAT1	2q32.2	0.857143	0.183908	0.000541496	0.0184395
								STAT4	2q32.2	0.857143	0.183908	0.000541496	0.0184395
								MYO1B	2q32.3	0.857143	0.183908	0.000541496	0.0184395
								OBFC2A	2q32.3	0.857143	0.183908	0.000541496	0.0184395
								SDPR	2q32.3	0.857143	0.183908	0.000541496	0.0184395
								TMEFF2	2q32.3	0.857143	0.183908	0.000541496	0.0184395
								PCGEM1	2q32.3	0.857143	0.183908	0.000541496	0.0184395
								SLC39A10	2q32.3	0.857143	0.183908	0.000541496	0.0184395
								DNAH7	2q32.3	0.857143	0.183908	0.000541496	0.0184395
								STK17B	2q32.3	0.857143	0.183908	0.000541496	0.0184395
								HECW2	2q32.3	0.857143	0.183908	0.000541496	0.0184395
								CCDC150	2q33.1	0.857143	0.183908	0.000541496	0.0184395
								LOC100130452	2q33.1	0.857143	0.183908	0.000541496	0.0184395
								GTF3C3	2q33.1	0.857143	0.183908	0.000541496	0.0184395
								C2orf66	2q33.1	0.857143	0.183908	0.000541496	0.0184395
								PGAP1	2q33.1	0.857143	0.183908	0.000541496	0.0184395
								ANKRD44	2q33.1	0.857143	0.183908	0.000541496	0.0184395
								SF3B1	2q33.1	0.857143	0.183908	0.000541496	0.0184395
								COQ10B	2q33.1	0.857143	0.183908	0.000541496	0.0184395
								HSPD1	2q33.1	0.857143	0.183908	0.000541496	0.0184395
								HSPE1-MOB4	2q33.1	0.857143	0.183908	0.000541496	0.0184395
								HSPE1	2q33.1	0.857143	0.183908	0.000541496	0.0184395
								MOB4	2q33.1	0.857143	0.183908	0.000541496	0.0184395
								RFTN2	2q33.1	0.857143	0.183908	0.000541496	0.0184395
								MARS2	2q33.1	0.857143	0.183908	0.000541496	0.0184395
								BOLL	2q33.1	0.857143	0.183908	0.000541496	0.0184395
								PLCL1	2q33.1	0.857143	0.183908	0.000541496	0.0184395
								SATB2	2q33.1	0.857143	0.183908	0.000541496	0.0184395
								FLJ32063	2q33.1	0.857143	0.183908	0.000541496	0.0184395
								FONG	2q33.1	0.857143	0.183908	0.000541496	0.0184395
								C2orf69	2q33.1	0.857143	0.183908	0.000541496	0.0184395
								TYW5	2q33.1	0.857143	0.183908	0.000541496	0.0184395
								C2orf47	2q33.1	0.857143	0.183908	0.000541496	0.0184395
								SPATS2L	2q33.1	0.857143	0.183908	0.000541496	0.0184395
								KCTD18	2q33.1	0.857143	0.183908	0.000541496	0.0184395
								SGOL2	2q33.1	0.857143	0.183908	0.000541496	0.0184395
								AOX1	2q33.1	0.857143	0.183908	0.000541496	0.0184395
								AOX2P	2q33.1	0.857143	0.183908	0.000541496	0.0184395
								LOC100507140	2q33.1	0.857143	0.183908	0.000541496	0.0184395
								BZW1	2q33.1	0.857143	0.183908	0.000541496	0.0184395
								CLK1	2q33.1	0.857143	0.183908	0.000541496	0.0184395
								PPIL3	2q33.1	0.857143	0.183908	0.000541496	0.0184395
								NIF3L1	2q33.1	0.857143	0.183908	0.000541496	0.0184395
								ORC2	2q33.1	0.857143	0.183908	0.000541496	0.0184395
								FAM126B	2q33.1	0.857143	0.183908	0.000541496	0.0184395
								NDUFB3	2q33.1	0.857143	0.183908	0.000541496	0.0184395
								CFLAR	2q33.1	0.857143	0.183908	0.000541496	0.0184395
								CFLAR-AS1	2q33.1	0.857143	0.183908	0.000541496	0.0184395
								CASP10	2q33.1	0.857143	0.183908	0.000541496	0.0184395
								CASP8	2q33.1	0.857143	0.183908	0.000541496	0.0184395
								ALS2CR12	2q33.1	0.857143	0.183908	0.000541496	0.0184395
								TRAK2	2q33.1	0.857143	0.183908	0.000541496	0.0184395
								STRADB	2q33.1	0.857143	0.183908	0.000541496	0.0184395
								ALS2CR11	2q33.1	0.857143	0.183908	0.000541496	0.0184395
								TMEM237	2q33.1	0.857143	0.183908	0.000541496	0.0184395
								MPP4	2q33.1	0.857143	0.183908	0.000541496	0.0184395
								ALS2	2q33.1	0.857143	0.183908	0.000541496	0.0184395
								CDK15	2q33.1	0.857143	0.183908	0.000541496	0.0184395
								FZD7	2q33.1	0.857143	0.183908	0.000541496	0.0184395
								SUMO1	2q33.1	0.857143	0.183908	0.000541496	0.0184395
								NOP58	2q33.1	0.857143	0.183908	0.000541496	0.0184395
								SNORD70	2q33.1	0.857143	0.183908	0.000541496	0.0184395
								SNORD11B	2q33.1	0.857143	0.183908	0.000541496	0.0184395
								SNORD11	2q33.1	0.857143	0.183908	0.000541496	0.0184395
								BMPR2	2q33.1	0.857143	0.183908	0.000541496	0.0184395
								FAM117B	2q33.2	0.857143	0.183908	0.000541496	0.0184395
								ICA1L	2q33.2	0.857143	0.183908	0.000541496	0.0184395
								WDR12	2q33.2	0.857143	0.183908	0.000541496	0.0184395
								ALS2CR8	2q33.2	0.857143	0.183908	0.000541496	0.0184395
								NBEAL1	2q33.2	0.857143	0.183908	0.000541496	0.0184395
								CYP20A1	2q33.2	0.857143	0.183908	0.000541496	0.0184395
								ABI2	2q33.2	0.857143	0.183908	0.000541496	0.0184395
								RAPH1	2q33.2	0.857143	0.183908	0.000541496	0.0184395
								CD28	2q33.2	0.857143	0.183908	0.000541496	0.0184395
								CTLA4	2q33.2	0.857143	0.183908	0.000541496	0.0184395
								ICOS	2q33.2	0.857143	0.183908	0.000541496	0.0184395
								PARD3B	2q33.3	0.857143	0.183908	0.000541496	0.0184395
								NRP2	2q33.3	0.857143	0.183908	0.000541496	0.0184395
								INO80D	2q33.3	0.857143	0.183908	0.000541496	0.0184395
								LOC100329109	2q33.3	0.857143	0.183908	0.000541496	0.0184395
								NDUFS1	2q33.3	0.857143	0.183908	0.000541496	0.0184395
								EEF1B2	2q33.3	0.857143	0.183908	0.000541496	0.0184395
								SNORA41	2q33.3	0.857143	0.183908	0.000541496	0.0184395
								SNORD51	2q33.3	0.857143	0.183908	0.000541496	0.0184395
								GPR1	2q33.3	0.857143	0.183908	0.000541496	0.0184395
								ZDBF2	2q33.3	0.857143	0.183908	0.000541496	0.0184395
								ADAM23	2q33.3	0.857143	0.183908	0.000541496	0.0184395
								LOC200726	2q33.3	0.857143	0.183908	0.000541496	0.0184395
								DYTN	2q33.3	0.857143	0.183908	0.000541496	0.0184395
								MDH1B	2q33.3	0.857143	0.183908	0.000541496	0.0184395
								FASTKD2	2q33.3	0.857143	0.183908	0.000541496	0.0184395
								MIR3130-1	2q33.3	0.857143	0.183908	0.000541496	0.0184395
								MIR3130-2	2q33.3	0.857143	0.183908	0.000541496	0.0184395
								hsa-mir-3130-1	2q33.3	0.857143	0.183908	0.000541496	0.0184395
								hsa-mir-3130-2	2q33.3	0.857143	0.183908	0.000541496	0.0184395
								hsa-mir-3130-3	2q33.3	0.857143	0.183908	0.000541496	0.0184395
								hsa-mir-3130-4	2q33.3	0.857143	0.183908	0.000541496	0.0184395
								CPO	2q33.3	0.857143	0.183908	0.000541496	0.0184395
								KLF7	2q33.3	0.857143	0.183908	0.000541496	0.0184395
								MIR2355	2q33.3	0.857143	0.183908	0.000541496	0.0184395
								hsa-mir-2355	2q33.3	0.857143	0.183908	0.000541496	0.0184395
								hsa-mir-1302-4	2q33.3	0.857143	0.183908	0.000541496	0.0184395
								CREB1	2q33.3	0.857143	0.183908	0.000541496	0.0184395
								METTL21A	2q33.3	0.857143	0.183908	0.000541496	0.0184395
								CCNYL1	2q33.3	0.857143	0.183908	0.000541496	0.0184395
								MIR4775	2q33.3	0.857143	0.183908	0.000541496	0.0184395
								FZD5	2q33.3	0.857143	0.183908	0.000541496	0.0184395
								PLEKHM3	2q33.3	0.857143	0.183908	0.000541496	0.0184395
								LOC100507443	2q33.3	0.857143	0.183908	0.000541496	0.0184395
								CRYGD	2q33.3	0.857143	0.183908	0.000541496	0.0184395
								CRYGC	2q33.3	0.857143	0.183908	0.000541496	0.0184395
								CRYGB	2q34	0.857143	0.183908	0.000541496	0.0184395
								CRYGA	2q34	0.857143	0.183908	0.000541496	0.0184395
								C2orf80	2q34	0.857143	0.183908	0.000541496	0.0184395
								IDH1	2q34	0.857143	0.183908	0.000541496	0.0184395
								PIKFYVE	2q34	0.857143	0.183908	0.000541496	0.0184395
								PTH2R	2q34	0.857143	0.183908	0.000541496	0.0184395
								MAP2	2q34	0.857143	0.183908	0.000541496	0.0184395
								UNC80	2q34	0.857143	0.183908	0.000541496	0.0184395
								RPE	2q34	0.857143	0.183908	0.000541496	0.0184395
								C2orf67	2q34	0.857143	0.183908	0.000541496	0.0184395
								ACADL	2q34	0.857143	0.183908	0.000541496	0.0184395
								MYL1	2q34	0.857143	0.183908	0.000541496	0.0184395
								LANCL1	2q34	0.857143	0.183908	0.000541496	0.0184395
								CPS1	2q34	0.857143	0.183908	0.000541496	0.0184395
								CPS1-IT1	2q34	0.857143	0.183908	0.000541496	0.0184395
								ERBB4	2q34	0.857143	0.183908	0.000541496	0.0184395
								MIR548F2	2q34	0.857143	0.183908	0.000541496	0.0184395
								hsa-mir-548f-2	2q34	0.857143	0.183908	0.000541496	0.0184395
								MIR4776-1	2q34	0.857143	0.183908	0.000541496	0.0184395
								MIR4776-2	2q34	0.857143	0.183908	0.000541496	0.0184395
[truncated: 2,391 more rows]

## Sheet: TableS2C
Supplementary Table 2C. Univariate and multivariate Cox proportional hazards analysis of overall survival for tumors in Clusters.
Left: Survival analysis on 91 CCAs.
Right: Survival analysis on 58 CCAs from validation cohort
Variable	Univariate analysis				Multivariate analysis				Variable	Univariate analysis				Multivariate analysis
	Hazard ratio (HR)	95% CI for HR	p value		Hazard ratio	95% CI for HR	p value			Hazard ratio (HR)	95% CI for HR	p value		Hazard ratio	95% CI for HR	p value
Fluke-associated tumors	2.8418	1.5459-5.2243	0.000773463		1.6237	0.5048-5.2224	0.416127		Fluke-associated tumors	2.1442	0.7269-6.3251	0.166958		0.2929	0.0488-1.758	0.179294
Anatomical site perihilar	1.6223	0.863-3.0497	0.132977		0.5858	0.2639-1.3003	0.188675		Anatomical site perihilar	1.6025	0.5365-4.7866	0.398342
Anatomical site distal	1.2303	0.2862-5.2885	0.780625		1.3947	0.1586-12.2663	0.764248		Anatomical site distal	1.2732	0.2959-5.4791	0.745663
Sex male	1.2745	0.6983-2.326	0.429495		1.0994	0.5293-2.2835	0.799366		Sex male	1.2939	0.5955-2.8114	0.515262
Age	1.006	0.9796-1.0332	0.657606						Age	0.9879	0.9593-1.0173	0.416805
Grade non-papillary	0.8406	0.4125-1.7132	0.632665		2.2321	0.8478-5.8767	0.104005		HBV positive	1.6272	0.2125-12.4585	0.639211
HBV positive	0.1678	0.0228-1.2353	0.0796956						HCV Positive	0	0-Inf	0.998186
HCV Positive	0.8797	0.1191-6.5	0.900076						Stage 2	1.9215	0.6956-5.3081	0.207738		1.4587	0.4422-4.8113	0.535235
Stage 2	1.9877	0.4003-9.8709	0.400832		1.6987	0.2817-10.2451	0.563314		Stage 3	0.7927	0.0965-6.5124	0.828809		0.2858	0.0263-3.1018	0.303248
Stage 3	5.9133	1.5994-21.8618	0.00772255		8.9747	1.6293-49.4339	0.011711		Stage 4	4.0752	1.4937-11.1185	0.00607906		4.8672	1.325-17.8793	0.0171325
Stage 4	7.2498	2.1279-24.7	0.00153829		12.505	2.2028-70.9896	0.00435325		Cluster 1 (Cluster 4 as ref)	4.1918	0.886-19.831	0.0707045		9.4137	1.0349-85.6329	0.046549
Cluster 2 (Cluster 1 as ref)	0.6878	0.3476-1.3611	0.282558		0.9426	0.3658-2.4286	0.902539		Cluster 2 (Cluster 4 as ref)	3.403	1.3965-8.2922	0.00704115		5.1294	1.7067-15.416	0.00358993
Cluster 3 (Cluster 1 as ref)	0.3934	0.1142-1.3553	0.139343		0.0508	0.0044-0.5875	0.0170328
Cluster 4 (Cluster 1 as ref)	0.1996	0.0867-0.4596	0.000152661		0.1295	0.028-0.599	0.00890346		Cluster 1 (Cluster 2 as ref)	1.2318	0.2687-5.6469	0.788422		1.8352	0.2829-11.9051	0.524482
									Computed using coxph function in R package survival.
Cluster 3 (Cluster 2 as ref)	0.5719	0.1641-1.9927	0.380249		0.0539	0.005-0.5829	0.0161961		CI = confidence interval
Cluster 4 (Cluster 2 as ref)	0.2902	0.1225-0.6872	0.00491059		0.1374	0.0367-0.5139	0.00318574		Bold indicates statistically significant variables.
									Anatomical site intrahepatic used as reference.
Cluster 4 (Cluster 3 as ref)	0.5074	0.1336-1.9272	0.319043		2.5472	0.2631-24.6565	0.419514		Stage 1 used as reference
Computed using coxph function in R package survival.									Clusters 4 and 2 used as reference in turn
CI = confidence interval									The multivariate analysis shows the final model after applying the R function "step" to a starting model that included all the variables in the table.
Bold indicates statistically significant variables.
Anatomical site intrahepatic used as reference.
Stage 1 used as reference
Clusters 1, 2, and 3 used as reference in turn
The multivariate analysis shows the final model after applying the R function "step" to a starting model that included all the variables in the table.
